# Supplementary material
Source: PubMed Central journal article supplement (PMC5697951)
Supplement: DB170398SupplementaryData.pdf [file DB170398SupplementaryData.pdf]

SUPPLEMENTARY DATA

**Supplementary Table 1.** Association of plasma lipid associated SNPs from Global Lipids Genetic Consortium with risk factors for diabetic retinopathy.

| SNP        | Nearest Gene | Primary trait/Secondary trait(s) | Fasting Glucose P-Value | Study                              | HbA1c P-Value | Study                       | Hypertension P-Value | Study                              | Type 2 Diabetes P-Value | Study                             |
|------------|--------------|----------------------------------|-------------------------|------------------------------------|---------------|-----------------------------|----------------------|------------------------------------|-------------------------|-----------------------------------|
| rs1047891  | CPS1         | HDL                              | 0.798                   | 13K exome sequence analysis        | 0.533         | 13K exome sequence analysis | -                    | -                                  | 0.00893                 | GoT2D WGS + replication           |
| rs2290547  | SETD2        | HDL                              | 0.131                   | MAGIC GWAS                         | 0.853         | MAGIC GWAS                  | -                    | -                                  | 0.241                   | GoT2D WGS                         |
| rs2013208  | RBM5         | HDL                              | 0.74                    | BioMe AMP T2D GWAS                 | 0.868         | BioMe AMP T2D GWAS          | -                    | -                                  | 0.154                   | GWAS SIGMA                        |
| rs6805251  | GSK3B        | HDL                              | 0.48                    | BioMe AMP T2D GWAS                 | 0.771         | BioMe AMP T2D GWAS          | -                    | -                                  | 0.0085                  | 70Kfor T2D GWAS                   |
| rs10019888 | C4orf52      | HDL                              | 0.216                   | MAGIC GWAS                         | 0.967         | MAGIC GWAS                  | -                    | -                                  | 0.107                   | GWAS SIGMA                        |
| rs3822072  | FAM13A       | HDL                              | 0.774                   | MAGIC GWAS                         | 0.86          | MAGIC GWAS                  | -                    | -                                  | 0.00319                 | 70Kfor T2D GWAS                   |
| rs605066   | CITED2       | HDL                              | 0.801                   | BioMe AMP T2D GWAS                 | 0.711         | BioMe AMP T2D GWAS          | -                    | -                                  | 0.0381                  | GoT2D WGS                         |
| rs702485   | DAGLB        | HDL                              | 0.243                   | BioMe AMP T2D GWAS                 | 0.806         | BioMe AMP T2D GWAS          | -                    | -                                  | 0.234                   | 70Kfor T2D GWAS                   |
| rs4142995  | SNX13        | HDL                              | 0.543                   | BioMe AMP T2D GWAS                 | 0.605         | BioMe AMP T2D GWAS          | -                    | -                                  | 0.0261                  | 70Kfor T2D GWAS                   |
| rs17173637 | TMEM176A     | HDL                              | 0.967                   | BioMe AMP T2D GWAS                 | 0.803         | BioMe AMP T2D GWAS          | -                    | -                                  | 0.065                   | GWAS SIGMA                        |
| rs11246602 | OR4C46       | HDL                              | 0.0292                  | MAGIC GWAS                         | 0.819         | MAGIC GWAS                  | -                    | -                                  | 0.115                   | GoT2D WGS + replication           |
| rs4759375  | SBNO1        | HDL                              | 0.207                   | BioMe AMP T2D GWAS                 | 0.802         | BioMe AMP T2D GWAS          | -                    | -                                  | 0.0335                  | GoT2D WGS                         |
| rs4148008  | ABCA8        | HDL                              | 0.765                   | MAGIC GWAS                         | 0.814         | MAGIC GWAS                  | -                    | -                                  | 0.11                    | DIAGRAM Transethnic meta-analysis |
| rs12967135 | MC4R         | HDL                              | 0.0182                  | MAGIC GWAS                         | 0.816         | MAGIC GWAS                  | -                    | -                                  | 0.000367                | GoT2D WGS + replication           |
| rs12328675 | COBLL1       | HDL                              | 0.538                   | BioMe AMP T2D GWAS                 | 0.863         | BioMe AMP T2D GWAS          | 0.0192               | Oxford BioBank exome chip analysis | 1.12E-08                | GoT2D 82k exome chip analysis     |
| rs386000   | LILRA3       | HDL                              | 0.712                   | BioMe AMP T2D GWAS                 | 0.859         | BioMe AMP T2D GWAS          | 0.0392               | Oxford BioBank exome chip analysis | 0.229                   | CAMP GWAS                         |
| rs2925979  | CMIP         | HDL                              | 0.844                   | BioMe AMP T2D GWAS                 | 0.67          | BioMe AMP T2D GWAS          | 0.136                | Oxford BioBank exome chip analysis | 0.0000014               | 70Kfor T2D GWAS                   |
| rs7134594  | MVK          | HDL                              | 0.415                   | BioMe AMP T2D GWAS                 | 0.326         | BioMe AMP T2D GWAS          | 0.145                | Oxford BioBank exome chip analysis | 0.107                   | BioMe AMP T2D GWAS                |
| rs7134375  | PDE3A        | HDL                              | 0.179                   | BioMe AMP T2D GWAS                 | 0.458         | BioMe AMP T2D GWAS          | 0.152                | Oxford BioBank exome chip analysis | 0.00654                 | 70Kfor T2D GWAS                   |
| rs1689800  | ZNF648       | HDL                              | 0.0497                  | BioMe AMP T2D GWAS                 | 0.36          | BioMe AMP T2D GWAS          | 0.246                | Oxford BioBank exome chip analysis | 0.000162                | 70Kfor T2D GWAS                   |
| rs3136441  | LRP4         | HDL                              | 0.00424                 | CAMP GWAS                          | 0.296         | MAGIC GWAS                  | 0.312                | Oxford BioBank exome chip analysis | 0.394                   | SIGMA exome chip analysis         |
| rs2293889  | TRPS1        | HDL                              | 0.222                   | Oxford BioBank exome chip analysis | -             | -                           | 0.327                | Oxford BioBank exome chip analysis | -                       | -                                 |
| rs838880   | SCARB1       | HDL                              | 0.456                   | BioMe AMP T2D GWAS                 | 0.855         | BioMe AMP T2D GWAS          | 0.351                | Oxford BioBank exome chip analysis | 0.000491                | SIGMA exome chip analysis         |

SUPPLEMENTARY DATA

|            |              |               |        |                                    |        |                    |       |                                    |             |                                   |
|------------|--------------|---------------|--------|------------------------------------|--------|--------------------|-------|------------------------------------|-------------|-----------------------------------|
| rs4650994  | ANGPTL1      | HDL           | 0.795  | BioMe AMP T2D GWAS                 | 0.852  | BioMe AMP T2D GWAS | 0.363 | Oxford BioBank exome chip analysis | 0.16        | CAMP GWAS                         |
| rs2602836  | ADH5         | HDL           | 0.443  | BioMe AMP T2D GWAS                 | 0.421  | MAGIC GWAS         | 0.384 | Oxford BioBank exome chip analysis | 0.0928      | GWAS SIGMA                        |
| rs12801636 | KAT5         | HDL           | 0.288  | BioMe AMP T2D GWAS                 | 0.824  | BioMe AMP T2D GWAS | 0.454 | Oxford BioBank exome chip analysis | 0.0124      | GoT2D 82k exome chip analysis     |
| rs2606736  | ATG7         | HDL           | 0.175  | BioMe AMP T2D GWAS                 | 0.424  | BioMe AMP T2D GWAS | 0.487 | Oxford BioBank exome chip analysis | 0.0131      | GoT2D 82k exome chip analysis     |
| rs13326165 | STAB1        | HDL           | 0.274  | BioMe AMP T2D GWAS                 | 0.791  | BioMe AMP T2D GWAS | 0.508 | Oxford BioBank exome chip analysis | 0.0994      | CAMP GWAS                         |
| rs11869286 | STARD3       | HDL           | 0.776  | BioMe AMP T2D GWAS                 | 0.107  | BioMe AMP T2D GWAS | 0.525 | Oxford BioBank exome chip analysis | 0.0306      | GoT2D 82k exome chip analysis     |
| rs12145743 | HDGF-PMVK    | HDL           | 0.592  | BioMe AMP T2D GWAS                 | 0.0163 | BioMe AMP T2D GWAS | 0.555 | Oxford BioBank exome chip analysis | 0.00569     | 70Kfor T2D GWAS                   |
| rs6450176  | ARL15        | HDL           | 0.49   | BioMe AMP T2D GWAS                 | 0.395  | BioMe AMP T2D GWAS | 0.603 | Oxford BioBank exome chip analysis | 0.00000077  | 70Kfor T2D GWAS                   |
| rs16942887 | LCAT         | HDL           | 0.491  | BioMe AMP T2D GWAS                 | 0.456  | BioMe AMP T2D GWAS | 0.613 | Oxford BioBank exome chip analysis | 0.0608      | GoT2D WGS                         |
| rs499974   | MOGAT2-DGAT2 | HDL           | 0.376  | BioMe AMP T2D GWAS                 | 0.0894 | BioMe AMP T2D GWAS | 0.673 | Oxford BioBank exome chip analysis | 0.034       | DIAGRAM Transethnic meta-analysis |
| rs737337   | ANGPTL8      | HDL           | 0.354  | BioMe AMP T2D GWAS                 | 0.683  | BioMe AMP T2D GWAS | 0.679 | Oxford BioBank exome chip analysis | 0.0102      | GoT2D WGS                         |
| rs2923084  | AMPD3        | HDL           | 0.137  | BioMe AMP T2D GWAS                 | 0.967  | BioMe AMP T2D GWAS | 0.683 | Oxford BioBank exome chip analysis | 0.0414      | BioMe AMP T2D GWAS                |
| rs4731702  | KLF14        | HDL           | 0.978  | BioMe AMP T2D GWAS                 | 0.837  | BioMe AMP T2D GWAS | 0.696 | Oxford BioBank exome chip analysis | 0.0000035   | DIAGRAM Transethnic meta-analysis |
| rs7255436  | ANGPTL4      | HDL           | 0.0304 | BioMe AMP T2D GWAS                 | 0.551  | BioMe AMP T2D GWAS | 0.794 | Oxford BioBank exome chip analysis | 0.118       | SIGMA exome chip analysis         |
| rs4983559  | ZBTB42-AKT1  | HDL           | 0.787  | BioMe AMP T2D GWAS                 | 0.265  | BioMe AMP T2D GWAS | 0.804 | Oxford BioBank exome chip analysis | 0.266       | GoT2D 82k exome chip analysis     |
| rs13107325 | SLC39A8      | HDL           | 0.569  | BioMe AMP T2D GWAS                 | 0.924  | BioMe AMP T2D GWAS | 0.832 | Oxford BioBank exome chip analysis | 0.158       | BioMe AMP T2D GWAS                |
| rs4129767  | PGS1         | HDL           | 0.0502 | BioMe AMP T2D GWAS                 | 0.255  | BioMe AMP T2D GWAS | 0.834 | Oxford BioBank exome chip analysis | 0.0381      | GoT2D 82k exome chip analysis     |
| rs2652834  | LACTB        | HDL           | 0.881  | BioMe AMP T2D GWAS                 | 0.479  | BioMe AMP T2D GWAS | 0.888 | Oxford BioBank exome chip analysis | 0.11        | 70Kfor T2D GWAS                   |
| rs181362   | UBE2L3       | HDL           | 0.599  | Oxford BioBank exome chip analysis | -      | -                  | 0.893 | Oxford BioBank exome chip analysis | -           | -                                 |
| rs4917014  | IKZF1        | HDL           | 0.599  | BioMe AMP T2D GWAS                 | 0.767  | BioMe AMP T2D GWAS | 0.914 | Oxford BioBank exome chip analysis | 0.208       | 70Kfor T2D GWAS                   |
| rs17695224 | HAS1         | HDL           | 0.519  | BioMe AMP T2D GWAS                 | 0.595  | BioMe AMP T2D GWAS | 0.965 | Oxford BioBank exome chip analysis | 0.0128      | SIGMA exome chip analysis         |
| rs4660293  | PABPC4       | HDL           | 0.925  | BioMe AMP T2D GWAS                 | 0.794  | BioMe AMP T2D GWAS | 0.657 | Oxford BioBank exome chip analysis | 0.000000115 | 70Kfor T2D GWAS                   |
| rs3764261  | CETP         | HDL/LDL/TC/TG | 0.446  | BioMe AMP T2D GWAS                 | 0.0434 | BioMe AMP T2D GWAS | 0.142 | Oxford BioBank exome chip analysis | 0.117       | BioMe AMP T2D GWAS                |

SUPPLEMENTARY DATA

|            |              |                      |        |                                    |        |                    |        |                                    |            |                                   |
|------------|--------------|----------------------|--------|------------------------------------|--------|--------------------|--------|------------------------------------|------------|-----------------------------------|
| rs12748152 | PIGV-NR0B2   | HDL/LDL/TG           | 0.655  | BioMe AMP T2D GWAS                 | 0.724  | BioMe AMP T2D GWAS | 0.577  | Oxford BioBank exome chip analysis | 0.0482     | BioMe AMP T2D GWAS                |
| rs1883025  | ABCA1        | HDL/TC               | 0.588  | BioMe AMP T2D GWAS                 | 0.779  | BioMe AMP T2D GWAS | 0.0834 | Oxford BioBank exome chip analysis | 0.0906     | 70Kfor T2D GWAS                   |
| rs7241918  | LIPG         | HDL/TC               | 0.977  | BioMe AMP T2D GWAS                 | 0.698  | BioMe AMP T2D GWAS | 0.48   | Oxford BioBank exome chip analysis | 0.00401    | CAMP GWAS                         |
| rs581080   | TTC39B       | HDL/TC               | 0.478  | GoT2D 82k exome chip analysis      | 0.732  | BioMe AMP T2D GWAS | 0.709  | Oxford BioBank exome chip analysis | 0.177      | CAMP GWAS                         |
| rs970548   | MARCH8-ALOX5 | HDL/TC               | 0.865  | BioMe AMP T2D GWAS                 | 0.644  | BioMe AMP T2D GWAS | 0.719  | Oxford BioBank exome chip analysis | 0.0715     | GoT2D 82k exome chip analysis     |
| rs1800961  | HNF4A        | HDL/TC               | 0.337  | BioMe AMP T2D GWAS                 | 0.934  | BioMe AMP T2D GWAS | 0.836  | Oxford BioBank exome chip analysis | 0.00000095 | GoT2D 82k exome chip analysis     |
| rs9987289  | PPP1R3B      | HDL/TC/LDL           | 0.883  | BioMe AMP T2D GWAS                 | 0.0902 | BioMe AMP T2D GWAS | 0.458  | Oxford BioBank exome chip analysis | 0.0022     | DIAGRAM Transethnic meta-analysis |
| rs1532085  | LIPC         | HDL/TC/TG            | 0.0706 | BioMe AMP T2D GWAS                 | 0.121  | BioMe AMP T2D GWAS | 0.446  | Oxford BioBank exome chip analysis | 0.00553    | 70Kfor T2D GWAS                   |
| rs6065906  | PLTP         | HDL/TG               | 0.0398 | CAMP GWAS                          | 0.464  | MAGIC GWAS         | -      | -                                  | 0.0197     | 70Kfor T2D GWAS                   |
| rs2972146  | IRS1         | HDL/TG               | 0.572  | BioMe AMP T2D GWAS                 | 0.308  | BioMe AMP T2D GWAS | 0.018  | Oxford BioBank exome chip analysis | 4.97E-12   | GoT2D 82k exome chip analysis     |
| rs4765127  | ZNF664       | HDL/TG               | 0.612  | BioMe AMP T2D GWAS                 | 0.199  | BioMe AMP T2D GWAS | 0.138  | Oxford BioBank exome chip analysis | 0.00235    | 70Kfor T2D GWAS                   |
| rs4846914  | GALNT2       | HDL/TG               | 0.468  | BioMe AMP T2D GWAS                 | 0.0758 | BioMe AMP T2D GWAS | 0.139  | Oxford BioBank exome chip analysis | 0.0539     | GoT2D 82k exome chip analysis     |
| rs1121980  | FTO          | HDL/TG               | 0.526  | BioMe AMP T2D GWAS                 | 0.819  | BioMe AMP T2D GWAS | 0.355  | Oxford BioBank exome chip analysis | 5.97E-29   | GoT2D 82k exome chip analysis     |
| rs1936800  | RSPO3        | HDL/TG <sub>a</sub>  | 0.423  | MAGIC GWAS                         | 0.0453 | MAGIC GWAS         | -      | -                                  | 0.01       | GoT2D WGS + replication           |
| rs2710642  | EHBP1        | LDL                  | 0.538  | MAGIC GWAS                         | 0.313  | MAGIC GWAS         | -      | -                                  | 0.0863     | GWAS SIGMA                        |
| rs2328223  | SNX5         | LDL                  | 0.25   | BioMe AMP T2D GWAS                 | 0.128  | BioMe AMP T2D GWAS | -      | -                                  | 0.0369     | GoT2D WGS                         |
| rs1250229  | FN1          | LDL                  | 0.826  | BioMe AMP T2D GWAS                 | 0.501  | BioMe AMP T2D GWAS | 0.149  | Oxford BioBank exome chip analysis | 0.25       | GoT2D 82k exome chip analysis     |
| rs5763662  | MTMR3        | LDL                  | 0.415  | MAGIC GWAS                         | 0.903  | MAGIC GWAS         | 0.213  | Oxford BioBank exome chip analysis | 0.0899     | GoT2D WGS                         |
| rs4942486  | BRCA2        | LDL                  | 0.462  | BioMe AMP T2D GWAS                 | 0.0208 | BioMe AMP T2D GWAS | 0.216  | Oxford BioBank exome chip analysis | 0.00431    | SIGMA exome chip analysis         |
| rs267733   | ANXA9-CERS2  | LDL                  | 0.293  | BioMe AMP T2D GWAS                 | 0.819  | BioMe AMP T2D GWAS | 0.492  | Oxford BioBank exome chip analysis | 0.225      | BioMe AMP T2D GWAS                |
| rs8017377  | NYNRIN       | LDL                  | 0.0587 | BioMe AMP T2D GWAS                 | 0.0882 | BioMe AMP T2D GWAS | 0.674  | Oxford BioBank exome chip analysis | 0.125      | GoT2D WGS + replication           |
| rs1801689  | APOH-PRXCA   | LDL                  | 0.697  | Oxford BioBank exome chip analysis | -      | -                  | 0.678  | Oxford BioBank exome chip analysis | -          | -                                 |
| rs364585   | SPTLC3       | LDL                  | 0.214  | BioMe AMP T2D GWAS                 | 0.16   | BioMe AMP T2D GWAS | 0.901  | Oxford BioBank exome chip analysis | 0.117      | 70Kfor T2D GWAS                   |
| rs17404153 | ACAD11       | LDL/HDL <sub>c</sub> | 0.159  | BioMe AMP T2D GWAS                 | 0.805  | BioMe AMP T2D GWAS | 0.277  | Oxford BioBank exome chip analysis | 0.0403     | 70Kfor T2D GWAS                   |

SUPPLEMENTARY DATA

|                   |                 |            |              |                           |              |                           |       |                                    |                |                                          |
|-------------------|-----------------|------------|--------------|---------------------------|--------------|---------------------------|-------|------------------------------------|----------------|------------------------------------------|
| rs1800562         | HFE             | LDL/TC     | 0.564        | BioMe AMP T2D GWAS        | 0.285        | BioMe AMP T2D GWAS        | -     | -                                  | 0.015          | GoT2D 82k exome chip analysis            |
| rs11136341        | PLEC1           | LDL/TC     | 0.971        | BioMe AMP T2D GWAS        | 0.88         | BioMe AMP T2D GWAS        | -     | -                                  | 0.03           | DIAGRAM Transethnic meta-analysis        |
| rs9411489         | ABO             | LDL/TC     | -            | -                         | -            | -                         | -     | -                                  | -              | -                                        |
| rs11220462        | ST3GAL4         | LDL/TC     | 0.987        | BioMe AMP T2D GWAS        | 0.844        | BioMe AMP T2D GWAS        | -     | -                                  | 0.156          | BioMe AMP T2D GWAS                       |
| rs7206971         | OSBPL7          | LDL/TC     | 0.746        | BioMe AMP T2D GWAS        | 0.039        | BioMe AMP T2D GWAS        | -     | -                                  | 0.0911         | GoT2D WGS + replication                  |
| rs629301          | SORT1           | LDL/TC     | 0.664        | BioMe AMP T2D GWAS        | 0.0536       | BioMe AMP T2D GWAS        | 0.167 | Oxford BioBank exome chip analysis | 0.0026         | DIAGRAM Transethnic meta-analysis        |
| rs4299376         | ABCG5/8         | LDL/TC     | 0.051        | MAGIC GWAS                | 0.179        | MAGIC GWAS                | 0.208 | Oxford BioBank exome chip analysis | 0.0595         | GWAS SIGMA                               |
| rs10102164        | SOX17           | LDL/TC     | 0.949        | BioMe AMP T2D GWAS        | 0.626        | BioMe AMP T2D GWAS        | 0.232 | Oxford BioBank exome chip analysis | 0.051          | DIAGRAM Transethnic meta-analysis        |
| rs4530754         | CSNK1G3         | LDL/TC     | 0.255        | BioMe AMP T2D GWAS        | 0.047        | BioMe AMP T2D GWAS        | 0.26  | Oxford BioBank exome chip analysis | 0.083          | DIAGRAM Transethnic meta-analysis        |
| rs3757354         | MYLIP           | LDL/TC     | 0.193        | BioMe AMP T2D GWAS        | 0.561        | BioMe AMP T2D GWAS        | 0.354 | Oxford BioBank exome chip analysis | 0.102          | GoT2D WGS                                |
| rs2030746         | LOC84931        | LDL/TC     | 0.954        | BioMe AMP T2D GWAS        | 0.389        | BioMe AMP T2D GWAS        | 0.45  | Oxford BioBank exome chip analysis | 0.0599         | GoT2D WGS                                |
| rs7640978         | CMTM6           | LDL/TC     | 0.162        | BioMe AMP T2D GWAS        | 0.586        | BioMe AMP T2D GWAS        | 0.745 | Oxford BioBank exome chip analysis | 0.0257         | BioMe AMP T2D GWAS                       |
| rs1564348         | LPA             | LDL/TC     | 0.226        | BioMe AMP T2D GWAS        | 0.49         | BioMe AMP T2D GWAS        | 0.854 | Oxford BioBank exome chip analysis | 0.05           | DIAGRAM Transethnic meta-analysis        |
| rs6029526         | TOP1            | LDL/TC     | 0.65         | BioMe AMP T2D GWAS        | 0.518        | BioMe AMP T2D GWAS        | 0.885 | Oxford BioBank exome chip analysis | 0.013          | GoT2D 82k exome chip analysis            |
| rs1367117         | APOB            | LDL/TC     | 0.296        | BioMe AMP T2D GWAS        | 0.637        | BioMe AMP T2D GWAS        | 0.909 | Oxford BioBank exome chip analysis | 0.0696         | 70Kfor T2D GWAS                          |
| rs6511720         | LDLR            | LDL/TC     | 0.491        | BioMe AMP T2D GWAS        | 0.251        | BioMe AMP T2D GWAS        | 0.95  | Oxford BioBank exome chip analysis | 0.03           | DIAGRAM Transethnic meta-analysis        |
| rs2479409         | PCSK9           | LDL/TC     | 0.525        | BioMe AMP T2D GWAS        | 0.0274       | BioMe AMP T2D GWAS        | 0.251 | Oxford BioBank exome chip analysis | 0.0169         | 70Kfor T2D GWAS                          |
| rs4420638         | APOE            | LDL/TC/HDL | 0.789        | BioMe AMP T2D GWAS        | 0.289        | BioMe AMP T2D GWAS        | -     | -                                  | 0.0000002      | DIAGRAM Transethnic meta-analysis        |
| rs10490626        | INSIG2          | LDL/TCb    | 0.799        | BioMe AMP T2D GWAS        | 0.52         | BioMe AMP T2D GWAS        | 0.523 | Oxford BioBank exome chip analysis | 0.0534         | CAMP GWAS                                |
| rs4722551         | MIR148A         | LDL/TGd/TC | 0.451        | BioMe AMP T2D GWAS        | 0.552        | BioMe AMP T2D GWAS        | 0.563 | Oxford BioBank exome chip analysis | 0.526          | BioMe AMP T2D GWAS                       |
| <b>rs7570971</b>  | <b>RAB3GAP1</b> | <b>TC</b>  | <b>0.674</b> | <b>MAGIC GWAS</b>         | <b>0.453</b> | <b>MAGIC GWAS</b>         | -     | -                                  | <b>0.141</b>   | <b>GoT2D WGS</b>                         |
| <b>rs11694172</b> | <b>FAM117B</b>  | <b>TC</b>  | <b>0.856</b> | <b>BioMe AMP T2D GWAS</b> | <b>0.975</b> | <b>BioMe AMP T2D GWAS</b> | -     | -                                  | <b>0.015</b>   | <b>DIAGRAM Transethnic meta-analysis</b> |
| <b>rs2758886</b>  | <b>KCNK17</b>   | <b>TC</b>  | <b>0.688</b> | <b>MAGIC GWAS</b>         | <b>0.148</b> | <b>MAGIC GWAS</b>         | -     | -                                  | <b>0.064</b>   | <b>GoT2D WGS + replication</b>           |
| <b>rs492602</b>   | <b>FLJ36070</b> | <b>TC</b>  | <b>0.446</b> | <b>BioMe AMP T2D GWAS</b> | <b>0.616</b> | <b>BioMe AMP T2D GWAS</b> | -     | -                                  | <b>0.00467</b> | <b>GoT2D 82k exome chip analysis</b>     |
| <b>rs2277862</b>  | <b>ERGIC3</b>   | <b>TC</b>  | <b>0.708</b> | <b>BioMe AMP T2D GWAS</b> | <b>0.932</b> | <b>BioMe AMP T2D GWAS</b> | -     | -                                  | <b>0.251</b>   | <b>GoT2D WGS</b>                         |

SUPPLEMENTARY DATA

|            |            |        |        |                                    |        |                    |       |                                    |          |                                   |
|------------|------------|--------|--------|------------------------------------|--------|--------------------|-------|------------------------------------|----------|-----------------------------------|
| rs10904908 | VIM-CUBN   | TC     | 0.79   | BioMe AMP T2D GWAS                 | 0.0738 | BioMe AMP T2D GWAS | 0.103 | Oxford BioBank exome chip analysis | 0.157    | GoT2D 82k exome chip analysis     |
| rs2290159  | RAF1       | TC     | 0.159  | BioMe AMP T2D GWAS                 | 0.164  | BioMe AMP T2D GWAS | 0.279 | Oxford BioBank exome chip analysis | 0.144    | GoT2D WGS + replication           |
| rs13315871 | PXK        | TC     | 0.0932 | BioMe AMP T2D GWAS                 | 0.228  | BioMe AMP T2D GWAS | 0.345 | Oxford BioBank exome chip analysis | 0.14     | DIAGRAM Transethnic meta-analysis |
| rs2814982  | C6orf106   | TC     | 0.151  | BioMe AMP T2D GWAS                 | 0.368  | BioMe AMP T2D GWAS | 0.381 | Oxford BioBank exome chip analysis | 0.0798   | GoT2D WGS + replication           |
| rs4253772  | PPARA      | TC     | 0.353  | BioMe AMP T2D GWAS                 | 0.831  | BioMe AMP T2D GWAS | 0.394 | Oxford BioBank exome chip analysis | 0.0213   | 70Kfor T2D GWAS                   |
| rs2287623  | ABCB11     | TC     | 0.671  | BioMe AMP T2D GWAS                 | 0.975  | BioMe AMP T2D GWAS | 0.496 | Oxford BioBank exome chip analysis | 0.0395   | 70Kfor T2D GWAS                   |
| rs10128711 | SPTY2D1    | TC     | 0.791  | BioMe AMP T2D GWAS                 | 0.973  | BioMe AMP T2D GWAS | 0.515 | Oxford BioBank exome chip analysis | 0.239    | 70Kfor T2D GWAS                   |
| rs11603023 | PHLDB1     | TC     | 0.177  | BioMe AMP T2D GWAS                 | 0.775  | BioMe AMP T2D GWAS | 0.611 | Oxford BioBank exome chip analysis | 0.04     | DIAGRAM Transethnic meta-analysis |
| rs7515577  | EVI5       | TC     | 0.602  | MAGIC GWAS                         | 0.385  | BioMe AMP T2D GWAS | 0.663 | Oxford BioBank exome chip analysis | 0.663    | GoT2D 82k exome chip analysis     |
| rs9376090  | HBS1L      | TC     | 0.583  | BioMe AMP T2D GWAS                 | 0.845  | BioMe AMP T2D GWAS | 0.669 | Oxford BioBank exome chip analysis | 0.0298   | CAMP GWAS                         |
| rs138777   | TOM1       | TC     | 0.509  | BioMe AMP T2D GWAS                 | 0.264  | BioMe AMP T2D GWAS | 0.739 | Oxford BioBank exome chip analysis | 0.018    | DIAGRAM Transethnic meta-analysis |
| rs1997243  | GPR146     | TC     | 0.312  | BioMe AMP T2D GWAS                 | 0.248  | BioMe AMP T2D GWAS | 0.944 | Oxford BioBank exome chip analysis | 0.0526   | GoT2D 82k exome chip analysis     |
| rs4883201  | PHC1-A2ML1 | TC     | 0.738  | BioMe AMP T2D GWAS                 | 0.458  | BioMe AMP T2D GWAS | 0.945 | Oxford BioBank exome chip analysis | 0.047    | DIAGRAM Transethnic meta-analysis |
| rs1077514  | ASAP3      | TC     | 0.813  | BioMe AMP T2D GWAS                 | 0.974  | BioMe AMP T2D GWAS | 0.223 | Oxford BioBank exome chip analysis | 0.3      | DIAGRAM Transethnic meta-analysis |
| rs7941030  | UBASH3B    | TC/HDL | 0.961  | Oxford BioBank exome chip analysis | -      | -                  | 0.252 | Oxford BioBank exome chip analysis | -        | -                                 |
| rs2642442  | MOSC1      | TC/LDL | 0.0574 | BioMe AMP T2D GWAS                 | 0.218  | BioMe AMP T2D GWAS | -     | -                                  | 0.34     | DIAGRAM Transethnic meta-analysis |
| rs514230   | IRF2BP2    | TC/LDL | 0.166  | MAGIC GWAS                         | 0.128  | MAGIC GWAS         | -     | -                                  | 0.174    | GoT2D 82k exome chip analysis     |
| rs11563251 | UGT1A1     | TC/LDL | 0.254  | MAGIC GWAS                         | 0.156  | MAGIC GWAS         | -     | -                                  | 0.175    | GWAS SIGMA                        |
| rs12916    | HMGCR      | TC/LDL | 0.194  | BioMe AMP T2D GWAS                 | 0.692  | BioMe AMP T2D GWAS | -     | -                                  | 0.0425   | GWAS SIGMA                        |
| rs3177928  | HLA        | TC/LDL | 0.394  | BioMe AMP T2D GWAS                 | 0.163  | BioMe AMP T2D GWAS | -     | -                                  | 0.232    | GoT2D WGS + replication           |
| rs9488822  | FRK        | TC/LDL | 0.593  | MAGIC GWAS                         | 0.333  | MAGIC GWAS         | -     | -                                  | 0.531    | GWAS SIGMA                        |
| rs2902940  | MAFB       | TC/LDL | 0.617  | MAGIC GWAS                         | 0.438  | MAGIC GWAS         | -     | -                                  | 0.376    | 70Kfor T2D GWAS                   |
| rs2081687  | CYP7A1     | TC/LDL | 0.0354 | BioMe AMP T2D GWAS                 | 0.757  | BioMe AMP T2D GWAS | 0.065 | Oxford BioBank exome chip analysis | 0.00221  | GoT2D 82k exome chip analysis     |
| rs11065987 | BRAP       | TC/LDL | 0.314  | BioMe AMP T2D GWAS                 | 0.808  | BioMe AMP T2D GWAS | 0.219 | Oxford BioBank exome chip analysis | 0.0629   | GoT2D 82k exome chip analysis     |
| rs1169288  | HNF1A      | TC/LDL | 0.855  | MAGIC GWAS                         | 0.633  | BioMe AMP T2D GWAS | 0.727 | Oxford BioBank exome               | 0.000445 | 19K exome sequence analysis       |

SUPPLEMENTARY DATA

|                   |                |           |                |                           |              |                           |               |                                           |                |                                          | chip analysis |
|-------------------|----------------|-----------|----------------|---------------------------|--------------|---------------------------|---------------|-------------------------------------------|----------------|------------------------------------------|---------------|
| rs3780181         | VLDLR          | TC/LDL    | 0.842          | BioMe AMP T2D GWAS        | 0.548        | BioMe AMP T2D GWAS        | 0.786         | Oxford BioBank exome chip analysis        | 0.0863         | GWAS SIGMA                               |               |
| rs314253          | DLG4           | TC/LDL    | 0.506          | BioMe AMP T2D GWAS        | 0.844        | BioMe AMP T2D GWAS        | 0.832         | Oxford BioBank exome chip analysis        | 0.00147        | 70Kfor T2D GWAS                          |               |
| rs12670798        | DNAH11         | TC/LDL    | 0.075          | MAGIC GWAS                | 0.1          | BioMe AMP T2D GWAS        | 0.876         | Oxford BioBank exome chip analysis        | 0.0598         | GoT2D WGS                                |               |
| rs2072183         | NPC1L1         | TC/LDL    | 0.417          | BioMe AMP T2D GWAS        | 0.64         | BioMe AMP T2D GWAS        | 0.877         | Oxford BioBank exome chip analysis        | 0.00366        | GoT2D 82k exome chip analysis            |               |
| rs2000999         | HPR            | TC/LDL    | 0.994          | BioMe AMP T2D GWAS        | 0.16         | BioMe AMP T2D GWAS        | 0.924         | Oxford BioBank exome chip analysis        | 0.194          | 70Kfor T2D GWAS                          |               |
| rs2255141         | GPAM           | TC/LDL    | 0.97           | BioMe AMP T2D GWAS        | 0.549        | BioMe AMP T2D GWAS        | 0.986         | Oxford BioBank exome chip analysis        | 0.000909       | GoT2D 82k exome chip analysis            |               |
| rs12027135        | LDLRAP1        | TC/LDL    | 0.65           | BioMe AMP T2D GWAS        | 0.023        | BioMe AMP T2D GWAS        | 0.683         | Oxford BioBank exome chip analysis        | 0.0408         | GWAS SIGMA                               |               |
| rs6882076         | TIMD4          | TC/TG/LDL | 0.527          | BioMe AMP T2D GWAS        | 0.901        | BioMe AMP T2D GWAS        | 0.593         | Oxford BioBank exome chip analysis        | 0.0052         | DIAGRAM Transethnic meta-analysis        |               |
| rs10401969        | CILP2          | TC/TG/LDL | 0.454          | BioMe AMP T2D GWAS        | 0.7          | BioMe AMP T2D GWAS        | 0.673         | Oxford BioBank exome chip analysis        | 0.000000417    | GoT2D 82k exome chip analysis            |               |
| <b>rs13238203</b> | <b>TYW1B</b>   | <b>TG</b> | <b>0.00087</b> | <b>CAMP GWAS</b>          | <b>0.025</b> | <b>MAGIC GWAS</b>         | -             | -                                         | <b>0.0289</b>  | <b>GoT2D WGS</b>                         |               |
| <b>rs3198697</b>  | <b>PDXDC1</b>  | <b>TG</b> | <b>0.335</b>   | <b>BioMe AMP T2D GWAS</b> | <b>0.514</b> | <b>BioMe AMP T2D GWAS</b> | -             | -                                         | <b>0.0256</b>  | <b>GoT2D WGS</b>                         |               |
| <b>rs11649653</b> | <b>CTF1</b>    | <b>TG</b> | <b>0.674</b>   | <b>BioMe AMP T2D GWAS</b> | <b>0.152</b> | <b>BioMe AMP T2D GWAS</b> | -             | -                                         | <b>0.04</b>    | <b>DIAGRAM Transethnic meta-analysis</b> |               |
| <b>rs5756931</b>  | <b>PLA2G6</b>  | <b>TG</b> | <b>0.95</b>    | <b>BioMe AMP T2D GWAS</b> | <b>0.409</b> | <b>BioMe AMP T2D GWAS</b> | -             | -                                         | <b>0.127</b>   | <b>CAMP GWAS</b>                         |               |
| <b>rs2068888</b>  | <b>CYP26A1</b> | <b>TG</b> | <b>0.729</b>   | <b>BioMe AMP T2D GWAS</b> | <b>0.55</b>  | <b>BioMe AMP T2D GWAS</b> | <b>0.0743</b> | <b>Oxford BioBank exome chip analysis</b> | <b>0.03</b>    | <b>DIAGRAM Transethnic meta-analysis</b> |               |
| <b>rs10761731</b> | <b>JMJD1C</b>  | <b>TG</b> | <b>0.41</b>    | <b>BioMe AMP T2D GWAS</b> | <b>0.999</b> | <b>BioMe AMP T2D GWAS</b> | <b>0.084</b>  | <b>Oxford BioBank exome chip analysis</b> | <b>0.0839</b>  | <b>CAMP GWAS</b>                         |               |
| <b>rs7248104</b>  | <b>INSR</b>    | <b>TG</b> | <b>0.42</b>    | <b>BioMe AMP T2D GWAS</b> | <b>0.132</b> | <b>BioMe AMP T2D GWAS</b> | <b>0.132</b>  | <b>Oxford BioBank exome chip analysis</b> | <b>0.00422</b> | <b>GoT2D 82k exome chip analysis</b>     |               |
| <b>rs2929282</b>  | <b>FRMD5</b>   | <b>TG</b> | <b>0.504</b>   | <b>BioMe AMP T2D GWAS</b> | <b>0.313</b> | <b>BioMe AMP T2D GWAS</b> | <b>0.192</b>  | <b>Oxford BioBank exome chip analysis</b> | <b>0.187</b>   | <b>GoT2D 82k exome chip analysis</b>     |               |
| <b>rs1832007</b>  | <b>AKR1C4</b>  | <b>TG</b> | <b>0.0186</b>  | <b>BioMe AMP T2D GWAS</b> | <b>0.18</b>  | <b>BioMe AMP T2D GWAS</b> | <b>0.287</b>  | <b>Oxford BioBank exome chip analysis</b> | <b>0.0421</b>  | <b>GWAS SIGMA</b>                        |               |
| <b>rs8077889</b>  | <b>MPP3</b>    | <b>TG</b> | <b>0.939</b>   | <b>BioMe AMP T2D GWAS</b> | <b>0.324</b> | <b>BioMe AMP T2D GWAS</b> | <b>0.354</b>  | <b>Oxford BioBank exome chip analysis</b> | <b>0.0566</b>  | <b>CAMP GWAS</b>                         |               |
| <b>rs11776767</b> | <b>PINX1</b>   | <b>TG</b> | <b>0.486</b>   | <b>BioMe AMP T2D GWAS</b> | <b>0.516</b> | <b>BioMe AMP T2D GWAS</b> | <b>0.503</b>  | <b>Oxford BioBank exome chip analysis</b> | <b>0.18</b>    | <b>DIAGRAM Transethnic meta-analysis</b> |               |
| <b>rs2412710</b>  | <b>CAPN3</b>   | <b>TG</b> | <b>0.362</b>   | <b>BioMe AMP T2D GWAS</b> | <b>0.893</b> | <b>BioMe AMP T2D GWAS</b> | <b>0.545</b>  | <b>Oxford BioBank exome chip analysis</b> | <b>0.0373</b>  | <b>GoT2D WGS + replication</b>           |               |
| <b>rs645040</b>   | <b>MSL2L1</b>  | <b>TG</b> | <b>0.0381</b>  | <b>BioMe AMP T2D GWAS</b> | <b>0.266</b> | <b>BioMe AMP T2D GWAS</b> | <b>0.695</b>  | <b>Oxford BioBank exome chip analysis</b> | <b>0.00594</b> | <b>GoT2D WGS + replication</b>           |               |
| <b>rs442177</b>   | <b>KLHL8</b>   | <b>TG</b> | <b>0.0875</b>  | <b>BioMe AMP T2D GWAS</b> | <b>0.507</b> | <b>BioMe AMP T2D GWAS</b> | <b>0.825</b>  | <b>Oxford BioBank exome chip analysis</b> | <b>0.012</b>   | <b>DIAGRAM Transethnic meta-analysis</b> |               |

SUPPLEMENTARY DATA

|                |            |               |              |                           |              |                           |              |                                           |               |                                   |
|----------------|------------|---------------|--------------|---------------------------|--------------|---------------------------|--------------|-------------------------------------------|---------------|-----------------------------------|
| rs9686661      | MAP3K1     | TG            | 0.0357       | BioMe AMP T2D GWAS        | 0.554        | BioMe AMP T2D GWAS        | 0.995        | Oxford BioBank exome chip analysis        | 2.54E-09      | 70Kfor T2D GWAS                   |
| <b>rs38855</b> | <b>MET</b> | <b>TG</b>     | <b>0.715</b> | <b>BioMe AMP T2D GWAS</b> | <b>0.437</b> | <b>BioMe AMP T2D GWAS</b> | <b>0.997</b> | <b>Oxford BioBank exome chip analysis</b> | <b>0.0824</b> | <b>GoT2D WGS + replication</b>    |
| rs998584       | VEGFA      | TG/HDL        | 0.427        | BioMe AMP T2D GWAS        | 0.201        | BioMe AMP T2D GWAS        | -            | -                                         | 0.00224       | GoT2D 82k exome chip analysis     |
| rs11613352     | LRP1       | TG/HDL        | 0.404        | MAGIC GWAS                | 0.775        | MAGIC GWAS                | -            | -                                         | 0.021         | 70Kfor T2D GWAS                   |
| rs17145738     | MLXIPL     | TG/HDL        | 0.0524       | BioMe AMP T2D GWAS        | 0.0336       | BioMe AMP T2D GWAS        | 0.0584       | Oxford BioBank exome chip analysis        | 0.0107        | GoT2D 82k exome chip analysis     |
| rs12678919     | LPL        | TG/HDL        | 0.805        | BioMe AMP T2D GWAS        | 0.609        | BioMe AMP T2D GWAS        | 0.341        | Oxford BioBank exome chip analysis        | 0.00338       | 70Kfor T2D GWAS                   |
| rs731839       | PEPD       | TG/HDL        | 0.561        | BioMe AMP T2D GWAS        | 0.937        | BioMe AMP T2D GWAS        | 0.525        | Oxford BioBank exome chip analysis        | 0.0001        | DIAGRAM Transethnic meta-analysis |
| rs2131925      | ANGPTL3    | TG/LDL/TC     | 0.743        | BioMe AMP T2D GWAS        | 0.535        | BioMe AMP T2D GWAS        | 0.0332       | Oxford BioBank exome chip analysis        | 0.0288        | 70Kfor T2D GWAS                   |
| rs174546       | FADS1-2-3  | TG/LDL/TC/HDL | 0.534        | BioMe AMP T2D GWAS        | 0.532        | BioMe AMP T2D GWAS        | 0.618        | Oxford BioBank exome chip analysis        | 0.0035        | GoT2D 82k exome chip analysis     |
| rs1495741      | NAT2       | TG/TC         | 0.235        | BioMe AMP T2D GWAS        | 0.101        | BioMe AMP T2D GWAS        | 0.613        | Oxford BioBank exome chip analysis        | 0.0844        | GoT2D 82k exome chip analysis     |
| rs1260326      | GCKR       | TG/TC         | 0.51         | BioMe AMP T2D GWAS        | 0.642        | BioMe AMP T2D GWAS        | 0.672        | Oxford BioBank exome chip analysis        | 4.8E-09       | GoT2D 82k exome chip analysis     |
| rs964184       | APOA1      | TG/TC/HDL/LDL | 0.369        | BioMe AMP T2D GWAS        | 0.0107       | BioMe AMP T2D GWAS        | 0.119        | Oxford BioBank exome chip analysis        | 0.11          | DIAGRAM Transethnic meta-analysis |
| rs2954029      | TRIB1      | TG/TC/LDL/HDL | 0.0136       | BioMe AMP T2D GWAS        | 0.449        | BioMe AMP T2D GWAS        | 0.0798       | Oxford BioBank exome chip analysis        | 0.0342        | 70Kfor T2D GWAS                   |
| rs6831256      | LRPAP1     | TG/TCf/LDLf   | 0.307        | BioMe AMP T2D GWAS        | 0.119        | BioMe AMP T2D GWAS        | 0.136        | Oxford BioBank exome chip analysis        | 0.0123        | GoT2D 82k exome chip analysis     |

Green cells indicate significant P-Values ( $P < 5E-8$ ).

Bold cells indicate SNPs that are not significant for independent of type 2 diabetes, Hemoglobin A1c (HbA1c), fasting glucose, and hypertension and are unique to each lipid fraction.

Details on the studies cited in this table can be found at <http://www.type2diabetesgenetics.org/informational/data>.

SUPPLEMENTARY DATA

**Supplementary Table 2.** Heterogeneity  $I^2$  estimates for all SNPs.

| SNP        | Any DR |         | Severe DR |         |
|------------|--------|---------|-----------|---------|
|            | I2, %  | P value | I2, %     | P value |
| rs12748152 | 0.0    | 0.501   | 15.5      | 0.305   |
| rs12145743 | 32.4   | 0.116   | 0.0       | 0.641   |
| rs4650994  | 0.0    | 0.786   | 0.0       | 0.584   |
| rs4660293  | 4.0    | 0.407   | 0.0       | 0.997   |
| rs1689800  | 0.0    | 0.557   | 20.0      | 0.253   |
| rs4846914  | 0.0    | 0.774   | 0.0       | 0.437   |
| rs1047891  | 0.0    | 0.953   | 0.0       | 0.959   |
| rs12328675 | 0.0    | 0.810   | 0.0       | 0.610   |
| rs2972146  | 0.0    | 0.731   | 15.8      | 0.298   |
| rs2606736  | 31.0   | 0.109   | 0.0       | 0.600   |
| rs2290547  | 0.0    | 0.815   | 0.0       | 0.770   |
| rs2013208  | 20.0   | 0.220   | 0.0       | 0.861   |
| rs13326165 | 16.6   | 0.263   | 11.0      | 0.342   |
| rs6805251  | 0.0    | 0.610   | 0.0       | 0.952   |
| rs10019888 | 28.2   | 0.161   | 0.0       | 0.690   |
| rs3822072  | 35.1   | 0.076   | 50.5      | 0.027   |
| rs2602836  | 0.0    | 0.794   | 0.0       | 0.519   |
| rs13107325 | 57.8   | 0.020   | 0.0       | 0.372   |
| rs6450176  | 18.1   | 0.241   | 0.0       | 0.508   |
| rs1936800  | 34.7   | 0.079   | 51.6      | 0.024   |
| rs605066   | 0.0    | 0.467   | 0.0       | 0.664   |
| rs702485   | 0.0    | 0.595   | 15.1      | 0.300   |
| rs4142995  | 0.0    | 0.680   | 0.0       | 0.786   |
| rs4917014  | 29.2   | 0.131   | 23.9      | 0.223   |
| rs17173637 | 0.0    | 0.614   | 48.3      | 0.036   |
| rs4731702  | 6.7    | 0.377   | 40.3      | 0.089   |
| rs9987289  | 37.8   | 0.058   | 17.3      | 0.279   |
| rs2293889  | 35.1   | 0.076   | 22.9      | 0.225   |
| rs581080   | 12.0   | 0.313   | 0.0       | 0.634   |
| rs1883025  | 42.4   | 0.038   | 2.2       | 0.421   |
| rs970548   | 49.9   | 0.010   | 0.0       | 0.748   |
| rs11246602 | 41.0   | 0.045   | 39.4      | 0.086   |
| rs12801636 | 0.0    | 0.824   | 0.0       | 0.590   |
| rs499974   | 0.0    | 0.800   | 28.5      | 0.182   |
| rs2923084  | 7.2    | 0.371   | 27.6      | 0.190   |
| rs3136441  | 0.0    | 0.515   | 0.0       | 0.696   |
| rs7134375  | 0.0    | 0.983   | 0.0       | 0.850   |
| rs7134594  | 20.8   | 0.212   | 24.2      | 0.213   |
| rs4759375  | 49.5   | 0.011   | 20.7      | 0.252   |



SUPPLEMENTARY DATA

|            |      |       |      |       |
|------------|------|-------|------|-------|
| rs4765127  | 0.0  | 0.462 | 0.0  | 0.812 |
| rs838880   | 0.0  | 0.589 | 0.0  | 0.448 |
| rs4983559  | 0.0  | 0.590 | 10.3 | 0.351 |
| rs1532085  | 0.0  | 0.812 | 0.0  | 0.847 |
| rs2652834  | 30.5 | 0.125 | 45.7 | 0.056 |
| rs1121980  | 0.0  | 0.834 | 47.1 | 0.049 |
| rs3764261  | 25.8 | 0.158 | 25.8 | 0.198 |
| rs16942887 | 30.2 | 0.116 | 0.0  | 0.811 |
| rs2925979  | 5.0  | 0.396 | 0.0  | 0.937 |
| rs11869286 | 0.0  | 0.533 | 0.0  | 0.518 |
| rs4148008  | 35.4 | 0.074 | 28.1 | 0.177 |
| rs4129767  | 6.7  | 0.377 | 0.0  | 0.868 |
| rs7241918  | 28.9 | 0.134 | 0.0  | 0.883 |
| rs12967135 | 0.0  | 0.510 | 0.0  | 0.551 |
| rs17695224 | 0.0  | 0.590 | 0.0  | 0.941 |
| rs7255436  | 0.0  | 0.509 | 41.8 | 0.079 |
| rs737337   | 0.0  | 0.464 | 30.3 | 0.158 |
| rs386000   | 25.5 | 0.186 | 20.0 | 0.271 |
| rs1800961  | 0.0  | 0.517 | 18.8 | 0.286 |
| rs6065906  | 44.9 | 0.031 | 0.0  | 0.460 |
| rs181362   | 8.8  | 0.351 | 0.0  | 0.582 |
| rs267733   | 27.6 | 0.140 | 24.5 | 0.210 |
| rs2479409  | 0.0  | 0.493 | 0.0  | 0.893 |
| rs629301   | 24.2 | 0.187 | 5.8  | 0.388 |
| rs2710642  | 0.0  | 0.599 | 0.0  | 0.758 |
| rs10490626 | 0.0  | 0.458 | 37.4 | 0.172 |
| rs2030746  | 0.0  | 0.727 | 1.4  | 0.428 |
| rs1250229  | 0.0  | 0.553 | 0.0  | 0.565 |
| rs1367117  | 25.5 | 0.161 | 33.7 | 0.129 |
| rs4299376  | 0.0  | 0.562 | 0.0  | 0.507 |
| rs7640978  | 11.2 | 0.325 | 0.0  | 0.972 |
| rs17404153 | 0.0  | 0.626 | 0.0  | 0.496 |
| rs4530754  | 0.0  | 0.630 | 7.5  | 0.373 |
| rs3757354  | 0.0  | 0.779 | 0.0  | 0.532 |
| rs1800562  | 0.0  | 0.698 | 0.0  | 0.964 |
| rs1564348  | 0.0  | 0.614 | 31.6 | 0.176 |
| rs4722551  | 24.8 | 0.168 | 14.7 | 0.308 |
| rs10102164 | 0.0  | 0.485 | 48.9 | 0.034 |
| rs11136341 | 0.0  | 0.526 | 46.9 | 0.068 |
| rs635634   | 0.0  | 0.774 | 0.0  | 0.451 |
| rs11220462 | 0.0  | 0.802 | 0.0  | 0.805 |
| rs4942486  | 14.4 | 0.289 | 0.0  | 0.776 |
| rs8017377  | 16.5 | 0.274 | 0.0  | 0.808 |

## SUPPLEMENTARY DATA

|            |      |       |      |       |
|------------|------|-------|------|-------|
| rs1801689  | 0.0  | 0.670 | 13.5 | 0.282 |
| rs7206971  | 35.3 | 0.080 | 0.0  | 0.892 |
| rs6511720  | 0.0  | 0.993 | 5.2  | 0.388 |
| rs4420638  | 3.7  | 0.411 | 0.0  | 0.926 |
| rs364585   | 0.0  | 0.757 | 0.0  | 0.972 |
| rs2328223  | 0.0  | 0.487 | 0.0  | 0.711 |
| rs6029526  | 4.8  | 0.398 | 9.2  | 0.357 |
| rs5763662  | 0.0  | 0.941 | 0.0  | 0.536 |
| rs2131925  | 13.5 | 0.299 | 11.4 | 0.335 |
| rs1260326  | 0.0  | 0.469 | 0.0  | 0.643 |
| rs645040   | 0.0  | 0.553 | 0.0  | 0.670 |
| rs6831256  | 21.1 | 0.208 | 0.0  | 0.925 |
| rs442177   | 18.1 | 0.241 | 26.8 | 0.189 |
| rs9686661  | 0.0  | 0.776 | 0.0  | 0.483 |
| rs998584   | 29.1 | 0.138 | 51.2 | 0.030 |
| rs38855    | 43.0 | 0.031 | 0.0  | 0.736 |
| rs13238203 | 0.0  | 0.907 | 0.0  | 0.398 |
| rs17145738 | 0.0  | 0.787 | 21.1 | 0.249 |
| rs11776767 | 0.0  | 0.615 | 28.0 | 0.178 |
| rs1495741  | 25.8 | 0.158 | 57.0 | 0.010 |
| rs12678919 | 0.0  | 0.951 | 0.0  | 0.963 |
| rs2954029  | 0.0  | 0.468 | 35.0 | 0.118 |
| rs1832007  | 22.9 | 0.188 | 14.0 | 0.317 |
| rs10761731 | 0.0  | 0.481 | 36.2 | 0.109 |
| rs2068888  | 24.1 | 0.175 | 3.7  | 0.407 |
| rs174546   | 0.0  | 0.668 | 0.0  | 0.483 |
| rs964184   | 0.0  | 0.579 | 55.7 | 0.013 |
| rs11613352 | 9.0  | 0.349 | 9.7  | 0.352 |
| rs2412710  | 0.0  | 0.729 | 0.0  | 0.886 |
| rs2929282  | 10.9 | 0.327 | 33.5 | 0.131 |
| rs3198697  | 9.5  | 0.352 | 54.6 | 0.040 |
| rs11649653 | 25.1 | 0.171 | 14.7 | 0.304 |
| rs8077889  | 51.3 | 0.014 | 40.0 | 0.112 |
| rs7248104  | 24.1 | 0.182 | 45.5 | 0.057 |
| rs731839   | 23.2 | 0.186 | 35.4 | 0.116 |
| rs5756931  | 0.0  | 0.461 | 8.2  | 0.366 |
| rs1077514  | 0.0  | 0.574 | 19.4 | 0.265 |
| rs12027135 | 44.7 | 0.024 | 58.5 | 0.007 |
| rs7515577  | 18.8 | 0.239 | 4.7  | 0.399 |
| rs2642442  | 0.0  | 0.942 | 0.0  | 0.752 |
| rs514230   | 0.0  | 0.539 | 0.0  | 0.975 |
| rs2287623  | 0.0  | 0.693 | 0.0  | 0.901 |
| rs11694172 | 0.0  | 0.913 | 0.0  | 0.705 |

SUPPLEMENTARY DATA

|            |      |       |      |       |
|------------|------|-------|------|-------|
| rs11563251 | 39.9 | 0.046 | 13.2 | 0.319 |
| rs7570971  | 0.0  | 0.976 | 0.0  | 0.547 |
| rs13315871 | 7.0  | 0.376 | 3.3  | 0.405 |
| rs2290159  | 18.5 | 0.237 | 0.0  | 0.842 |
| rs12916    | 27.8 | 0.138 | 0.0  | 0.892 |
| rs6882076  | 24.9 | 0.167 | 1.6  | 0.426 |
| rs2758886  | 0.0  | 0.526 | 0.0  | 0.623 |
| rs9376090  | 0.8  | 0.444 | 34.7 | 0.121 |
| rs3177928  | 0.0  | 0.883 | 0.0  | 0.766 |
| rs2814982  | 54.0 | 0.004 | 0.0  | 0.467 |
| rs9488822  | 18.6 | 0.236 | 19.3 | 0.260 |
| rs1997243  | 0.0  | 0.797 | 4.7  | 0.396 |
| rs12670798 | 1.2  | 0.439 | 30.1 | 0.159 |
| rs2072183  | 48.9 | 0.017 | 57.4 | 0.009 |
| rs2081687  | 26.7 | 0.149 | 15.3 | 0.298 |
| rs3780181  | 15.8 | 0.272 | 0.0  | 0.620 |
| rs10904908 | 0.0  | 0.864 | 0.0  | 0.983 |
| rs2255141  | 0.0  | 0.464 | 0.0  | 0.912 |
| rs11603023 | 3.4  | 0.414 | 0.0  | 0.579 |
| rs10128711 | 0.0  | 0.691 | 0.0  | 0.782 |
| rs7941030  | 28.5 | 0.132 | 21.1 | 0.243 |
| rs4883201  | 1.9  | 0.427 | 25.2 | 0.228 |
| rs11065987 | 0.0  | 0.601 | 20.5 | 0.261 |
| rs1169288  | 23.6 | 0.181 | 0.0  | 0.473 |
| rs2000999  | 5.6  | 0.388 | 17.4 | 0.283 |
| rs314253   | 23.3 | 0.196 | 0.0  | 0.596 |
| rs10401969 | 8.8  | 0.351 | 8.7  | 0.361 |
| rs492602   | 31.6 | 0.116 | 27.9 | 0.187 |
| rs2277862  | 0.0  | 0.739 | 11.0 | 0.339 |
| rs2902940  | 0.0  | 0.701 | 0.4  | 0.437 |
| rs138777   | 4.4  | 0.403 | 47.6 | 0.039 |
| rs4253772  | 0.0  | 0.729 | 3.3  | 0.401 |

---

SUPPLEMENTARY DATA

**Supplementary Table 3.** Summary of previously-reported lipid-associated SNPs and association with diabetic retinopathy in all pooled studies

| SNP ID     | Chromosome | Build 37 Position | Effect/Reference Allele | GLGC Data |         | Any DR  |       |         | Severe DR |       |         |
|------------|------------|-------------------|-------------------------|-----------|---------|---------|-------|---------|-----------|-------|---------|
|            |            |                   |                         | $\beta$   | P value | $\beta$ | SE    | P value | $\beta$   | SE    | P value |
| <b>HDL</b> |            |                   |                         |           |         |         |       |         |           |       |         |
| rs12748152 | 1          | 27138393          | C/T                     | 0.051     | 1.0E-15 | -0.063  | 0.091 | 0.486   | -0.176    | 0.125 | 0.161   |
| rs12145743 | 1          | 156700651         | G/T                     | 0.02      | 2.0E-08 | -0.004  | 0.016 | 0.796   | 0.01      | 0.081 | 0.899   |
| rs4650994  | 1          | 178515312         | G/A                     | 0.021     | 7.0E-09 | -0.039  | 0.042 | 0.351   | -0.038    | 0.063 | 0.546   |
| rs4660293  | 1          | 40028180          | A/G                     | 0.035     | 3.0E-18 | -0.044  | 0.065 | 0.497   | -0.16     | 0.088 | 0.067   |
| rs1689800  | 1          | 182168885         | A/G                     | 0.034     | 5.0E-20 | -0.028  | 0.033 | 0.396   | -0.032    | 0.057 | 0.579   |
| rs4846914  | 1          | 230295691         | A/G                     | 0.048     | 4.0E-41 | -0.007  | 0.049 | 0.893   | -0.048    | 0.068 | 0.478   |
| rs1047891  | 2          | 211540507         | C/A                     | 0.027     | 9.0E-10 | 0.000   | 0.016 | 0.996   | 0.000     | 0.005 | 0.975   |
| rs12328675 | 2          | 165540800         | C/T                     | 0.045     | 2.0E-15 | -0.07   | 0.068 | 0.304   | 0.016     | 0.126 | 0.899   |
| rs2972146  | 2          | 227100698         | G/T                     | 0.032     | 2.0E-17 | -0.077  | 0.045 | 0.09    | -0.009    | 0.046 | 0.847   |
| rs2606736  | 3          | 11400249          | C/T                     | 0.025     | 5.0E-08 | 0.001   | 0.032 | 0.967   | -0.026    | 0.043 | 0.551   |
| rs2290547  | 3          | 47061183          | G/A                     | 0.03      | 4.0E-09 | -0.002  | 0.037 | 0.958   | -0.031    | 0.075 | 0.681   |
| rs2013208  | 3          | 50129399          | T/C                     | 0.025     | 9.0E-12 | -0.026  | 0.029 | 0.362   | -0.002    | 0.023 | 0.939   |
| rs13326165 | 3          | 52532118          | A/G                     | 0.029     | 9.0E-11 | 0.014   | 0.035 | 0.686   | 0.066     | 0.084 | 0.435   |
| rs6805251  | 3          | 119560606         | T/C                     | 0.02      | 1.0E-08 | 0.046   | 0.043 | 0.278   | 0.11      | 0.061 | 0.071   |
| rs10019888 | 4          | 26062990          | A/G                     | 0.027     | 5.0E-08 | -0.073  | 0.057 | 0.205   | -0.086    | 0.087 | 0.327   |
| rs3822072  | 4          | 89741269          | G/A                     | 0.025     | 4.0E-12 | -0.017  | 0.037 | 0.645   | -0.012    | 0.054 | 0.831   |
| rs2602836  | 4          | 100014805         | A/G                     | 0.019     | 5.0E-08 | 0.024   | 0.047 | 0.619   | 0.005     | 0.068 | 0.944   |
| rs13107325 | 4          | 103188709         | C/T                     | 0.071     | 1.0E-15 | -0.124  | 0.131 | 0.344   | -0.142    | 0.219 | 0.515   |
| rs6450176  | 5          | 53298025          | G/A                     | 0.025     | 7.0E-10 | -0.016  | 0.039 | 0.686   | 0.035     | 0.057 | 0.539   |
| rs1936800  | 6          | 127436064         | C/T                     | 0.02      | 3.0E-10 | -0.035  | 0.027 | 0.196   | -0.028    | 0.052 | 0.584   |
| rs605066   | 6          | 139829666         | T/C                     | 0.028     | 3.0E-08 | -0.042  | 0.037 | 0.26    | 0.076     | 0.056 | 0.172   |
| rs702485   | 7          | 6449272           | G/A                     | 0.024     | 7.0E-12 | 0.006   | 0.032 | 0.852   | 0.029     | 0.055 | 0.593   |
| rs4142995  | 7          | 17919258          | G/T                     | 0.026     | 9.0E-12 | -0.046  | 0.041 | 0.26    | -0.087    | 0.063 | 0.166   |
| rs4917014  | 7          | 50305863          | G/T                     | 0.022     | 1.0E-08 | 0       | 0.052 | 0.998   | 0.105     | 0.066 | 0.113   |
| rs17173637 | 7          | 150529449         | T/C                     | 0.036     | 2.0E-08 | -0.061  | 0.055 | 0.267   | -0.193    | 0.144 | 0.181   |

SUPPLEMENTARY DATA

|            |    |           |     |       |          |        |       |       |        |       |       |
|------------|----|-----------|-----|-------|----------|--------|-------|-------|--------|-------|-------|
| rs4731702  | 7  | 130433384 | T/C | 0.029 | 5.0E-17  | -0.076 | 0.039 | 0.051 | 0.038  | 0.06  | 0.532 |
| rs9987289  | 8  | 9183358   | G/A | 0.082 | 2.0E-41  | -0.007 | 0.023 | 0.763 | 0.186  | 0.102 | 0.068 |
| rs2293889  | 8  | 116599199 | G/T | 0.031 | 4.0E-17  | -0.106 | 0.044 | 0.017 | -0.043 | 0.044 | 0.334 |
| rs581080*  | 9  | 15305378  | C/G | 0.042 | 1.0E-19  | 0.128  | 0.055 | 0.02  | 0.025  | 0.079 | 0.756 |
| rs1883025  | 9  | 107664301 | C/T | 0.07  | 2.0E-65  | 0.008  | 0.042 | 0.842 | 0.126  | 0.058 | 0.031 |
| rs970548   | 10 | 46013277  | C/A | 0.026 | 2.0E-10  | 0.023  | 0.037 | 0.522 | 0.072  | 0.06  | 0.233 |
| rs11246602 | 11 | 51512090  | C/T | 0.034 | 2.0E-10  | -0.011 | 0.075 | 0.888 | 0.02   | 0.09  | 0.826 |
| rs12801636 | 11 | 65391317  | A/G | 0.024 | 3.0E-08  | -0.02  | 0.039 | 0.612 | 0.002  | 0.064 | 0.981 |
| rs499974   | 11 | 75455021  | C/A | 0.026 | 1.0E-08  | -0.003 | 0.051 | 0.946 | 0.094  | 0.066 | 0.157 |
| rs2923084  | 11 | 10388782  | A/G | 0.026 | 5.0E-08  | 0.062  | 0.046 | 0.176 | -0.032 | 0.066 | 0.632 |
| rs3136441  | 11 | 46743247  | C/T | 0.054 | 7.0E-29  | -0.022 | 0.02  | 0.291 | 0.014  | 0.062 | 0.827 |
| rs7134375  | 12 | 20473758  | A/C | 0.021 | 1.0E-08  | -0.01  | 0.036 | 0.775 | -0.027 | 0.055 | 0.618 |
| rs7134594  | 12 | 110000193 | T/C | 0.035 | 2.0E-13  | 0.092  | 0.041 | 0.025 | 0.088  | 0.062 | 0.159 |
| rs4759375  | 12 | 123796238 | T/C | 0.056 | 3.0E-08  | 0.044  | 0.03  | 0.135 | 0.011  | 0.063 | 0.86  |
| rs4765127  | 12 | 124460167 | T/G | 0.032 | 8.0E-10  | 0.091  | 0.048 | 0.056 | 0.054  | 0.073 | 0.457 |
| rs838880   | 12 | 125261593 | C/T | 0.048 | 6.0E-32  | -0.026 | 0.047 | 0.582 | 0.022  | 0.066 | 0.738 |
| rs4983559  | 14 | 105277209 | G/A | 0.02  | 1.0E-08  | -0.045 | 0.057 | 0.425 | -0.161 | 0.08  | 0.046 |
| rs1532085  | 15 | 58683366  | A/G | 0.107 | 1.0E-188 | 0.021  | 0.04  | 0.59  | 0.08   | 0.058 | 0.169 |
| rs2652834  | 15 | 63396867  | G/A | 0.028 | 4.0E-11  | 0.048  | 0.051 | 0.351 | 0.134  | 0.08  | 0.094 |
| rs1121980  | 16 | 53809247  | G/A | 0.02  | 7.0E-09  | 0.008  | 0.017 | 0.637 | 0.078  | 0.066 | 0.234 |
| rs3764261  | 16 | 56993324  | A/C | 0.241 | 0.0E+00  | -0.018 | 0.047 | 0.703 | -0.056 | 0.063 | 0.369 |
| rs16942887 | 16 | 67928042  | A/G | 0.083 | 8.0E-54  | 0.06   | 0.056 | 0.284 | 0.046  | 0.087 | 0.603 |
| rs2925979  | 16 | 81534790  | C/T | 0.035 | 1.0E-19  | -0.036 | 0.045 | 0.418 | -0.002 | 0.036 | 0.952 |
| rs11869286 | 17 | 37813856  | C/G | 0.032 | 3.0E-17  | 0.016  | 0.039 | 0.681 | 0.004  | 0.057 | 0.942 |
| rs4148008  | 17 | 66875294  | C/G | 0.028 | 1.0E-12  | 0.032  | 0.025 | 0.2   | 0.013  | 0.044 | 0.764 |
| rs4129767  | 17 | 76403984  | A/G | 0.024 | 2.0E-11  | -0.001 | 0.04  | 0.979 | -0.049 | 0.055 | 0.379 |
| rs7241918  | 18 | 47160953  | T/G | 0.09  | 1.0E-44  | -0.013 | 0.024 | 0.573 | -0.029 | 0.077 | 0.711 |
| rs12967135 | 18 | 57849023  | G/A | 0.026 | 4.0E-08  | -0.079 | 0.048 | 0.101 | -0.027 | 0.073 | 0.715 |
| rs17695224 | 19 | 52324216  | G/A | 0.029 | 2.0E-13  | 0.068  | 0.045 | 0.134 | 0.094  | 0.065 | 0.145 |
| rs7255436  | 19 | 8433196   | A/C | 0.032 | 2.0E-08  | -0.014 | 0.038 | 0.71  | -0.118 | 0.065 | 0.07  |
| rs737337   | 19 | 11347493  | T/C | 0.056 | 5.0E-17  | 0.007  | 0.023 | 0.76  | -0.011 | 0.05  | 0.824 |
| rs386000   | 19 | 54792761  | C/G | 0.048 | 3.0E-23  | -0.009 | 0.051 | 0.867 | 0.008  | 0.054 | 0.875 |

SUPPLEMENTARY DATA

|            |    |           |     |       |          |        |       |       |        |       |       |
|------------|----|-----------|-----|-------|----------|--------|-------|-------|--------|-------|-------|
| rs1800961  | 20 | 43042364  | C/T | 0.127 | 2.0E-34  | -0.036 | 0.142 | 0.802 | -0.236 | 0.206 | 0.252 |
| rs6065906  | 20 | 44554015  | T/C | 0.059 | 5.0E-40  | 0.03   | 0.059 | 0.618 | 0.061  | 0.098 | 0.533 |
| rs181362   | 22 | 21932068  | C/T | 0.038 | 4.0E-18  | 0.004  | 0.042 | 0.926 | -0.127 | 0.058 | 0.028 |
| <b>LDL</b> |    |           |     |       |          |        |       |       |        |       |       |
| rs267733   | 1  | 150958836 | A/G | 0.033 | 5E-9     | 0.081  | 0.065 | 0.212 | -0.141 | 0.128 | 0.274 |
| rs2479409  | 1  | 55504650  | G/A | 0.064 | 3.0E-50  | -0.038 | 0.042 | 0.363 | -0.041 | 0.051 | 0.427 |
| rs629301   | 1  | 109818306 | T/G | 0.167 | 5.0E-241 | -0.025 | 0.051 | 0.621 | -0.031 | 0.105 | 0.767 |
| rs2710642  | 2  | 63149557  | A/G | 0.024 | 6E-9     | 0.02   | 0.045 | 0.665 | -0.071 | 0.059 | 0.229 |
| rs10490626 | 2  | 118835841 | G/A | 0.015 | 2.0E-12  | -0.082 | 0.086 | 0.341 | -0.012 | 0.199 | 0.951 |
| rs2030746  | 2  | 121309488 | T/C | 0.021 | 9.0E-09  | 0.053  | 0.03  | 0.078 | 0.007  | 0.053 | 0.897 |
| rs1250229  | 2  | 216304384 | C/T | 0.024 | 3E-8     | 0.001  | 0.039 | 0.983 | 0.045  | 0.054 | 0.406 |
| rs1367117  | 2  | 21263900  | A/G | 0.1   | 3.0E-139 | 0.009  | 0.032 | 0.791 | -0.032 | 0.07  | 0.642 |
| rs4299376  | 2  | 44072576  | G/T | 0.079 | 3.0E-73  | 0.049  | 0.05  | 0.333 | 0      | 0.01  | 0.979 |
| rs7640978  | 3  | 32533010  | C/T | 0.039 | 1E-8     | 0.023  | 0.07  | 0.743 | 0.052  | 0.098 | 0.594 |
| rs17404153 | 3  | 132163200 | G/T | 0.034 | 2.0E-09  | -0.054 | 0.067 | 0.419 | -0.068 | 0.087 | 0.437 |
| rs4530754  | 5  | 122855416 | A/G | 0.028 | 4.0E-12  | -0.034 | 0.041 | 0.41  | -0.063 | 0.061 | 0.303 |
| rs3757354  | 6  | 16127407  | C/T | 0.038 | 2.0E-17  | -0.037 | 0.035 | 0.297 | -0.047 | 0.052 | 0.368 |
| rs1800562  | 6  | 26093141  | G/A | 0.062 | 8.0E-14  | 0.04   | 0.197 | 0.84  | -0.003 | 0.01  | 0.772 |
| rs1564348  | 6  | 160578860 | C/T | 0.048 | 3.0E-21  | -0.009 | 0.055 | 0.87  | 0.024  | 0.107 | 0.823 |
| rs4722551  | 7  | 25991826  | C/T | 0.039 | 4E-14    | 0.056  | 0.054 | 0.297 | 0.012  | 0.075 | 0.878 |
| rs10102164 | 8  | 55421614  | A/G | 0.032 | 4E-11    | 0.025  | 0.054 | 0.643 | -0.014 | 0.074 | 0.855 |
| rs11136341 | 8  | 145043543 | G/A | 0.045 | 7.0E-12  | 0.07   | 0.049 | 0.156 | 0.078  | 0.074 | 0.293 |
| rs635634   | 9  | 136155000 | T/C |       |          | 0.039  | 0.057 | 0.494 | -0.012 | 0.078 | 0.881 |
| rs11220462 | 11 | 126243952 | A/G | 0.059 | 7.0E-21  | -0.049 | 0.058 | 0.392 | 0.006  | 0.013 | 0.617 |
| rs4942486  | 13 | 32953388  | T/C | 0.024 | 2E-11    | 0.007  | 0.039 | 0.861 | -0.038 | 0.054 | 0.481 |
| rs8017377  | 14 | 24883887  | A/G | 0.03  | 3.0E-15  | 0.103  | 0.05  | 0.041 | -0.066 | 0.084 | 0.435 |
| rs1801689  | 17 | 64210580  | C/A | 0.103 | 1E-11    | 0.017  | 0.272 | 0.95  | 0.275  | 0.458 | 0.549 |
| rs7206971  | 17 | 45425115  | A/G | 0.029 | 3.0E-07  | -0.011 | 0.04  | 0.784 | 0.024  | 0.046 | 0.608 |
| rs6511720  | 19 | 11202306  | G/T | 0.221 | 4.0E-262 | -0.067 | 0.06  | 0.267 | -0.161 | 0.126 | 0.2   |
| rs4420638  | 19 | 45422946  | G/A | 0.225 | 2.0E-178 | -0.059 | 0.067 | 0.379 | -0.174 | 0.095 | 0.065 |
| rs364585   | 20 | 12962718  | G/A | 0.025 | 4E-10    | -0.05  | 0.044 | 0.254 | 0.025  | 0.046 | 0.591 |
| rs2328223  | 20 | 17845921  | C/A | 0.03  | 6E-9     | 0.035  | 0.044 | 0.434 | 0.001  | 0.018 | 0.972 |

SUPPLEMENTARY DATA

|                      |    |           |     |        |          |        |       |       |        |       |       |
|----------------------|----|-----------|-----|--------|----------|--------|-------|-------|--------|-------|-------|
| rs6029526            | 20 | 39672618  | A/T | 0.044  | 5.0E-18  | -0.016 | 0.041 | 0.692 | -0.028 | 0.059 | 0.635 |
| rs5763662            | 22 | 30378703  | T/C | 0.044  | 1E-8     | 0.091  | 0.069 | 0.183 | 0.027  | 0.089 | 0.765 |
| <b>Triglycerides</b> |    |           |     |        |          |        |       |       |        |       |       |
| rs2131925            | 1  | 63025942  | T/G | 0.066  | 3.0E-74  | -0.006 | 0.017 | 0.728 | -0.009 | 0.033 | 0.781 |
| rs1260326            | 2  | 27730940  | T/C | 0.115  | 2.0E-239 | 0.056  | 0.037 | 0.133 | 0.035  | 0.046 | 0.448 |
| rs645040             | 3  | 135926622 | T/G | 0.029  | 2.0E-12  | -0.021 | 0.042 | 0.622 | -0.067 | 0.06  | 0.261 |
| rs6831256            | 4  | 3473139   | G/A | 0.026  | 2.0E-12  | 0.003  | 0.032 | 0.939 | 0.048  | 0.056 | 0.394 |
| rs442177             | 4  | 88030261  | T/G | 0.031  | 1.0E-18  | -0.035 | 0.039 | 0.364 | -0.076 | 0.054 | 0.159 |
| rs9686661            | 5  | 55861786  | T/C | 0.038  | 3.0E-16  | 0.018  | 0.039 | 0.653 | 0.139  | 0.071 | 0.05  |
| rs998584             | 6  | 43757896  | A/C | 0.029  | 3.0E-15  | 0.06   | 0.03  | 0.045 | 0.118  | 0.062 | 0.056 |
| rs38855              | 7  | 116358044 | A/G | -0.019 | 2.0E-08  | -0.017 | 0.041 | 0.683 | 0.032  | 0.057 | 0.575 |
| rs13238203           | 7  | 72129667  | C/T | 0.059  | 3.0E-06  | 0.002  | 0.095 | 0.98  | -0.297 | 0.593 | 0.616 |
| rs17145738           | 7  | 72982874  | C/T | 0.115  | 9.0E-99  | 0.109  | 0.066 | 0.101 | 0.119  | 0.091 | 0.192 |
| rs11776767           | 8  | 10683929  | C/G | 0.022  | 3.0E-11  | 0      | 0.007 | 0.999 | 0.075  | 0.061 | 0.215 |
| rs1495741            | 8  | 18272881  | G/A | 0.04   | 3.0E-12  | 0.045  | 0.041 | 0.27  | 0.086  | 0.055 | 0.118 |
| rs12678919           | 8  | 19844222  | A/G | 0.17   | 2.0E-199 | 0.079  | 0.06  | 0.191 | 0.116  | 0.103 | 0.258 |
| rs2954029            | 8  | 126490972 | A/T | 0.076  | 1.0E-107 | 0.014  | 0.022 | 0.535 | 0.034  | 0.057 | 0.554 |
| rs1832007            | 10 | 5254847   | A/G | -0.033 | 2.0E-12  | -0.02  | 0.048 | 0.678 | -0.016 | 0.047 | 0.737 |
| rs10761731           | 10 | 65027610  | A/T | -0.031 | 8.0E-12  | -0.034 | 0.036 | 0.343 | -0.045 | 0.051 | 0.378 |
| rs2068888            | 10 | 94839642  | G/A | -0.024 | 2.0E-11  | 0.005  | 0.016 | 0.781 | 0.018  | 0.052 | 0.729 |
| rs174546             | 11 | 61569830  | T/C | 0.045  | 7.0E-38  | -0.047 | 0.045 | 0.291 | -0.082 | 0.06  | 0.168 |
| rs964184             | 11 | 116648917 | G/C | 0.234  | 7.0E-224 | 0.076  | 0.048 | 0.115 | 0.105  | 0.068 | 0.123 |
| rs11613352           | 12 | 57792580  | C/T | 0.028  | 9.0E-14  | -0.009 | 0.012 | 0.454 | -0.008 | 0.016 | 0.598 |
| rs2412710            | 15 | 42683787  | A/G | 0.099  | 2.0E-11  | 0.02   | 0.039 | 0.61  | 0.144  | 0.301 | 0.631 |
| rs2929282            | 15 | 44245931  | T/A | 0.072  | 2.0E-09  | -0.079 | 0.057 | 0.162 | -0.006 | 0.057 | 0.923 |
| rs3198697            | 16 | 15129940  | C/T | 0.02   | 2.0E-08  | 0.005  | 0.056 | 0.928 | -0.008 | 0.098 | 0.935 |
| rs11649653           | 16 | 30918487  | C/G | 0.027  | 2.0E-07  | -0.007 | 0.036 | 0.839 | 0.085  | 0.068 | 0.216 |
| rs8077889            | 17 | 41878166  | C/A | 0.025  | 1.0E-08  | -0.066 | 0.058 | 0.254 | -0.011 | 0.044 | 0.796 |
| rs7248104            | 19 | 7224431   | G/A | 0.022  | 5.0E-10  | 0      | 0.002 | 0.904 | -0.042 | 0.06  | 0.479 |
| rs731839             | 19 | 33899065  | G/A | 0.022  | 3.0E-09  | -0.005 | 0.032 | 0.885 | 0.03   | 0.052 | 0.568 |
| rs5756931            | 22 | 38546033  | T/C | 0.02   | 3.0E-08  | 0.067  | 0.033 | 0.042 | 0.046  | 0.042 | 0.275 |

**Total Cholesterol**

SUPPLEMENTARY DATA

|            |    |           |     |        |         |        |       |       |        |       |       |
|------------|----|-----------|-----|--------|---------|--------|-------|-------|--------|-------|-------|
| rs1077514  | 1  | 23766233  | T/C | 0.03   | 6.0E-09 | 0.08   | 0.046 | 0.084 | 0.024  | 0.063 | 0.711 |
| rs12027135 | 1  | 25775733  | T/A | 0.027  | 5.0E-12 | -0.022 | 0.044 | 0.616 | 0.021  | 0.064 | 0.74  |
| rs7515577  | 1  | 93009438  | A/C | 0.037  | 2.0E-08 | 0.019  | 0.068 | 0.779 | -0.039 | 0.072 | 0.59  |
| rs2642442  | 1  | 220973563 | T/C | 0.035  | 3.0E-11 | 0.032  | 0.047 | 0.5   | -0.015 | 0.078 | 0.851 |
| rs514230   | 1  | 234858597 | T/A | 0.039  | 5.0E-14 | -0.004 | 0.013 | 0.741 | -0.003 | 0.061 | 0.962 |
| rs2287623  | 2  | 169830155 | G/A | 0.027  | 4.0E-12 | -0.034 | 0.045 | 0.45  | -0.015 | 0.06  | 0.809 |
| rs11694172 | 2  | 203532304 | G/A | 0.028  | 2.0E-09 | 0.004  | 0.049 | 0.931 | 0.036  | 0.078 | 0.646 |
| rs11563251 | 2  | 234679384 | T/C | 0.037  | 1.0E-09 | 0.109  | 0.058 | 0.059 | 0.018  | 0.082 | 0.828 |
| rs7570971  | 2  | 135837906 | A/C | 0.03   | 1.0E-13 | 0.077  | 0.066 | 0.245 | 0.042  | 0.101 | 0.676 |
| rs13315871 | 3  | 58381287  | G/A | 0.036  | 4.0E-08 | -0.002 | 0.023 | 0.918 | -0.019 | 0.106 | 0.861 |
| rs2290159  | 3  | 12628920  | G/C | 0.037  | 2.0E-09 | -0.007 | 0.014 | 0.61  | 0.047  | 0.094 | 0.615 |
| rs12916    | 5  | 74656539  | C/T | 0.073  | 5.8E-77 | -0.007 | 0.039 | 0.855 | 0.022  | 0.05  | 0.655 |
| rs6882076  | 5  | 156390297 | C/T | 0.051  | 5.0E-04 | 0.017  | 0.04  | 0.671 | 0.024  | 0.065 | 0.715 |
| rs2758886  | 6  | 39250837  | A/G | 0.023  | 3E-8    | -0.135 | 0.058 | 0.02  | -0.095 | 0.073 | 0.194 |
| rs9376090  | 6  | 135411228 | T/C | -0.025 | 3.0E-09 | 0.032  | 0.053 | 0.548 | 0.041  | 0.07  | 0.562 |
| rs3177928  | 6  | 32412435  | A/G | 0.048  | 1.0E-21 | 0.044  | 0.099 | 0.659 | -0.211 | 0.182 | 0.247 |
| rs2814982  | 6  | 34546560  | C/T | 0.044  | 4.0E-15 | -0.013 | 0.05  | 0.796 | 0.024  | 0.05  | 0.632 |
| rs9488822  | 6  | 116312893 | A/T | -0.034 | 1.0E-09 | -0.056 | 0.039 | 0.147 | -0.068 | 0.064 | 0.293 |
| rs1997243  | 7  | 1083777   | G/A | 0.033  | 3.0E-10 | 0.024  | 0.076 | 0.757 | -0.137 | 0.084 | 0.104 |
| rs12670798 | 7  | 21607352  | C/T | 0.034  | 5.0E-14 | -0.001 | 0.008 | 0.864 | -0.034 | 0.05  | 0.497 |
| rs2072183  | 7  | 44579180  | C/G | 0.036  | 4.0E-15 | -0.014 | 0.045 | 0.759 | -0.042 | 0.059 | 0.478 |
| rs2081687  | 8  | 59388565  | T/C | 0.038  | 9.0E-12 | 0.036  | 0.04  | 0.379 | 0.018  | 0.062 | 0.772 |
| rs3780181  | 9  | 2640759   | A/G | 0.044  | 7.0E-10 | 0.006  | 0.067 | 0.925 | -0.13  | 0.09  | 0.149 |
| rs10904908 | 10 | 17260290  | G/A | 0.025  | 3.0E-11 | 0.007  | 0.039 | 0.861 | -0.031 | 0.052 | 0.547 |
| rs2255141  | 10 | 113933886 | A/G | 0.031  | 7.0E-16 | -0.119 | 0.041 | 0.004 | -0.037 | 0.042 | 0.379 |
| rs11603023 | 11 | 118486067 | T/C | 0.022  | 1E-8    | -0.004 | 0.019 | 0.837 | 0.045  | 0.048 | 0.354 |
| rs10128711 | 11 | 18632984  | C/T | 0.031  | 1.0E-11 | -0.004 | 0.042 | 0.924 | -0.036 | 0.063 | 0.57  |
| rs7941030  | 11 | 122522375 | C/T | 0.028  | 2.0E-14 | 0.021  | 0.039 | 0.585 | 0.044  | 0.053 | 0.41  |
| rs4883201  | 12 | 9082581   | A/G | 0.035  | 2.0E-09 | -0.06  | 0.052 | 0.25  | 0.008  | 0.07  | 0.909 |
| rs11065987 | 12 | 112072424 | A/G | 0.031  | 2.0E-16 | 0      | 0.029 | 0.998 | -0.006 | 0.036 | 0.867 |
| rs1169288  | 12 | 121416650 | C/A | 0.032  | 4.0E-17 | 0.021  | 0.042 | 0.615 | 0.043  | 0.058 | 0.458 |
| rs2000999  | 16 | 72108093  | A/G | 0.065  | 4.0E-41 | 0.015  | 0.047 | 0.752 | 0.033  | 0.066 | 0.612 |



SUPPLEMENTARY DATA

|            |    |          |     |       |         |        |       |       |        |       |       |
|------------|----|----------|-----|-------|---------|--------|-------|-------|--------|-------|-------|
| rs314253   | 17 | 7091650  | T/C | 0.023 | 3.0E-10 | 0.048  | 0.044 | 0.277 | 0.001  | 0.067 | 0.994 |
| rs10401969 | 19 | 19407718 | T/C | 0.137 | 4.0E-77 | -0.02  | 0.031 | 0.509 | -0.155 | 0.095 | 0.102 |
| rs492602   | 19 | 49206417 | G/A | 0.031 | 1.0E-16 | -0.062 | 0.043 | 0.149 | -0.117 | 0.076 | 0.123 |
| rs2277862  | 20 | 34152782 | C/T | 0.035 | 5.0E-11 | 0.024  | 0.046 | 0.602 | -0.144 | 0.077 | 0.061 |
| rs2902940  | 20 | 39091487 | A/G | 0.024 | 9.0E-10 | -0.023 | 0.042 | 0.596 | -0.135 | 0.052 | 0.009 |
| rs138777   | 22 | 35711098 | A/G | 0.021 | 5.0E-08 | -0.008 | 0.013 | 0.516 | 0.034  | 0.057 | 0.545 |
| rs4253772  | 22 | 46627603 | T/C | 0.032 | 1.0E-08 | 0.092  | 0.081 | 0.258 | 0.136  | 0.135 | 0.315 |

SUPPLEMENTARY DATA

**Supplementary Table 4.** Summary of previously-reported lipid-associated SNPs and association with diabetic retinopathy in Caucasian and Chinese studies

| SNP ID     | Effect/Reference Allele | $\beta$ | Caucasian |       |         |           |       |         | Chinese |       |         |           |       |         |
|------------|-------------------------|---------|-----------|-------|---------|-----------|-------|---------|---------|-------|---------|-----------|-------|---------|
|            |                         |         | Any DR    |       |         | Severe DR |       |         | Any DR  |       |         | Severe DR |       |         |
|            |                         |         | $\beta$   | SE    | P value | $\beta$   | SE    | P value | $\beta$ | SE    | P value | $\beta$   | SE    | P value |
| <b>HDL</b> |                         |         |           |       |         |           |       |         |         |       |         |           |       |         |
| rs12748152 | C/T                     | 0.051   | -0.068    | 0.122 | 0.576   | -0.040    | 0.173 | 0.816   | 0.077   | 0.351 | 0.827   | -0.380    | 0.257 | 0.140   |
| rs12145743 | G/T                     | 0.02    | 0.038     | 0.070 | 0.582   | 0.063     | 0.139 | 0.650   | -       | -     | -       | -         | -     | -       |
| rs4650994  | G/A                     | 0.021   | 0.074     | 0.074 | 0.320   | 0.147     | 0.150 | 0.328   | -       | -     | -       | -         | -     | -       |
| rs4660293  | A/G                     | 0.035   | -0.035    | 0.095 | 0.711   | -0.060    | 0.155 | 0.699   | -0.029  | 0.158 | 0.855   | -0.203    | 0.125 | 0.105   |
| rs1689800  | A/G                     | 0.034   | -0.051    | 0.063 | 0.413   | 0.102     | 0.116 | 0.381   | -0.267  | 0.124 | 0.031   | -0.018    | 0.091 | 0.847   |
| rs4846914  | A/G                     | 0.048   | 0.004     | 0.090 | 0.968   | -0.112    | 0.127 | 0.378   | 0.073   | 0.133 | 0.582   | 0.025     | 0.104 | 0.810   |
| rs1047891  | C/A                     | 0.027   | 0.040     | 0.056 | 0.475   | 0.092     | 0.133 | 0.489   | -       | -     | -       | -         | -     | -       |
| rs12328675 | C/T                     | 0.045   | -0.070    | 0.098 | 0.472   | -0.138    | 0.204 | 0.499   | -       | -     | -       | -         | -     | -       |
| rs2972146  | G/T                     | 0.032   | -0.154    | 0.062 | 0.013   | -0.028    | 0.053 | 0.594   | 0.029   | 0.212 | 0.892   | 0.178     | 0.165 | 0.280   |
| rs2606736  | C/T                     | 0.025   | -0.067    | 0.064 | 0.302   | -0.116    | 0.143 | 0.419   | -       | -     | -       | -         | -     | -       |
| rs2290547  | G/A                     | 0.03    | 0.029     | 0.053 | 0.585   | 0.144     | 0.171 | 0.400   | -       | -     | -       | -         | -     | -       |
| rs2013208  | T/C                     | 0.025   | -0.043    | 0.036 | 0.231   | 0.005     | 0.024 | 0.838   | -       | -     | -       | -         | -     | -       |
| rs13326165 | A/G                     | 0.029   | -0.017    | 0.041 | 0.691   | 0.190     | 0.143 | 0.184   | -       | -     | -       | -         | -     | -       |
| rs6805251  | T/C                     | 0.02    | 0.063     | 0.067 | 0.352   | 0.157     | 0.120 | 0.191   | -       | -     | -       | -         | -     | -       |
| rs10019888 | A/G                     | 0.027   | -0.190    | 0.090 | 0.035   | -0.218    | 0.171 | 0.204   | -       | -     | -       | -         | -     | -       |
| rs3822072  | G/A                     | 0.025   | 0.099     | 0.060 | 0.098   | 0.054     | 0.105 | 0.611   | -       | -     | -       | -         | -     | -       |
| rs2602836  | A/G                     | 0.019   | 0.024     | 0.074 | 0.751   | 0.036     | 0.108 | 0.742   | -       | -     | -       | -         | -     | -       |
| rs13107325 | C/T                     | 0.071   | -0.263    | 0.160 | 0.101   | -0.260    | 0.255 | 0.308   | -       | -     | -       | -         | -     | -       |
| rs6450176  | G/A                     | 0.025   | 0.118     | 0.075 | 0.118   | 0.233     | 0.145 | 0.109   | -       | -     | -       | -         | -     | -       |
| rs1936800  | C/T                     | 0.02    | -0.029    | 0.034 | 0.400   | -0.044    | 0.097 | 0.645   | -       | -     | -       | -         | -     | -       |
| rs605066   | T/C                     | 0.028   | -0.018    | 0.060 | 0.762   | 0.142     | 0.131 | 0.280   | 0.098   | 0.124 | 0.430   | 0.139     | 0.091 | 0.125   |
| rs702485   | G/A                     | 0.024   | 0.002     | 0.119 | 0.985   | -0.074    | 0.218 | 0.733   | 0.133   | 0.184 | 0.470   | 0.143     | 0.129 | 0.270   |
| rs4142995  | G/T                     | 0.026   | 0.004     | 0.068 | 0.949   | -0.146    | 0.154 | 0.341   | -0.039  | 0.109 | 0.718   | -0.129    | 0.084 | 0.124   |
| rs4917014  | G/T                     | 0.022   | -0.007    | 0.115 | 0.955   | 0.188     | 0.158 | 0.235   | -0.119  | 0.115 | 0.302   | -0.031    | 0.088 | 0.720   |
| rs17173637 | T/C                     | 0.036   | -0.021    | 0.065 | 0.748   | 0.072     | 0.344 | 0.835   | -       | -     | -       | -         | -     | -       |

SUPPLEMENTARY DATA

|            |     |       |        |       |       |        |       |       |        |       |       |        |       |       |
|------------|-----|-------|--------|-------|-------|--------|-------|-------|--------|-------|-------|--------|-------|-------|
| rs4731702  | T/C | 0.029 | -0.203 | 0.069 | 0.003 | -0.179 | 0.141 | 0.205 | -0.096 | 0.119 | 0.419 | 0.022  | 0.094 | 0.812 |
| rs9987289  | G/A | 0.082 | -0.001 | 0.024 | 0.955 | 0.304  | 0.334 | 0.363 | -      | -     | -     | -      | -     | -     |
| rs2293889  | G/T | 0.031 | -0.190 | 0.076 | 0.012 | 0.023  | 0.135 | 0.868 | 0.238  | 0.152 | 0.118 | 0.021  | 0.116 | 0.854 |
| rs581080   | C/G | 0.042 | 0.262  | 0.133 | 0.049 | 0.067  | 0.205 | 0.744 | -      | -     | -     | -      | -     | -     |
| rs1883025  | C/T | 0.07  | -0.108 | 0.081 | 0.184 | 0.155  | 0.139 | 0.266 | 0.380  | 0.147 | 0.010 | 0.065  | 0.100 | 0.513 |
| rs970548   | C/A | 0.026 | 0.051  | 0.048 | 0.292 | 0.049  | 0.091 | 0.591 | -      | -     | -     | -      | -     | -     |
| rs11246602 | C/T | 0.034 | -0.113 | 0.216 | 0.600 | -0.192 | 0.266 | 0.471 | -      | -     | -     | -      | -     | -     |
| rs12801636 | A/G | 0.024 | 0.001  | 0.058 | 0.990 | 0.117  | 0.220 | 0.596 | -0.023 | 0.109 | 0.832 | 0.035  | 0.086 | 0.683 |
| rs499974   | C/A | 0.026 | -0.028 | 0.091 | 0.762 | -0.046 | 0.132 | 0.728 | 0.025  | 0.122 | 0.841 | 0.196  | 0.097 | 0.042 |
| rs2923084  | A/G | 0.026 | 0.088  | 0.084 | 0.291 | 0.089  | 0.364 | 0.807 | 0.087  | 0.111 | 0.432 | -0.140 | 0.085 | 0.098 |
| rs3136441  | C/T | 0.054 | -0.008 | 0.022 | 0.703 | -0.025 | 0.258 | 0.923 | -      | -     | -     | -      | -     | -     |
| rs7134375  | A/C | 0.021 | -0.036 | 0.059 | 0.537 | -0.086 | 0.104 | 0.409 | -      | -     | -     | -      | -     | -     |
| rs7134594  | T/C | 0.035 | 0.016  | 0.087 | 0.855 | 0.086  | 0.280 | 0.758 | 0.099  | 0.121 | 0.413 | -0.006 | 0.091 | 0.951 |
| rs4759375  | T/C | 0.056 | 0.034  | 0.034 | 0.317 | 0.040  | 0.127 | 0.751 | -      | -     | -     | -      | -     | -     |
| rs4765127  | T/G | 0.032 | 0.086  | 0.076 | 0.257 | 0.040  | 0.108 | 0.708 | -      | -     | -     | -      | -     | -     |
| rs838880   | C/T | 0.048 | -0.057 | 0.101 | 0.574 | 0.091  | 0.162 | 0.575 | 0.164  | 0.115 | 0.153 | 0.071  | 0.093 | 0.449 |
| rs4983559  | G/A | 0.02  | 0.118  | 0.341 | 0.729 | -      | -     | -     | -      | -     | -     | -      | -     | -     |
| rs1532085  | A/G | 0.107 | 0.163  | 0.075 | 0.031 | 0.066  | 0.157 | 0.673 | -0.118 | 0.107 | 0.273 | 0.138  | 0.083 | 0.094 |
| rs2652834  | G/A | 0.028 | 0.075  | 0.077 | 0.330 | 0.282  | 0.145 | 0.052 | -      | -     | -     | -      | -     | -     |
| rs1121980  | G/A | 0.02  | 0.029  | 0.045 | 0.516 | 0.172  | 0.115 | 0.135 | -      | -     | -     | -      | -     | -     |
| rs3764261  | A/C | 0.241 | 0.055  | 0.107 | 0.604 | 0.081  | 0.127 | 0.522 | -0.025 | 0.153 | 0.868 | -0.163 | 0.115 | 0.157 |
| rs16942887 | A/G | 0.083 | 0.258  | 0.100 | 0.010 | 0.238  | 0.168 | 0.156 | 0.854  | 0.404 | 0.034 | 0.206  | 0.287 | 0.474 |
| rs2925979  | C/T | 0.035 | -0.084 | 0.108 | 0.436 | -0.085 | 0.106 | 0.422 | -0.003 | 0.112 | 0.978 | 0.033  | 0.084 | 0.693 |
| rs11869286 | C/G | 0.032 | 0.067  | 0.090 | 0.456 | 0.013  | 0.173 | 0.939 | -0.064 | 0.110 | 0.562 | -0.021 | 0.088 | 0.809 |
| rs4148008  | C/G | 0.028 | 0.029  | 0.040 | 0.470 | -0.037 | 0.314 | 0.906 | -      | -     | -     | -      | -     | -     |
| rs4129767  | A/G | 0.024 | -0.058 | 0.086 | 0.502 | -0.010 | 0.121 | 0.932 | -0.153 | 0.117 | 0.189 | -0.084 | 0.091 | 0.356 |
| rs7241918  | T/G | 0.09  | -0.014 | 0.031 | 0.639 | 0.064  | 0.330 | 0.845 | -0.053 | 0.153 | 0.732 | -0.007 | 0.122 | 0.952 |
| rs12967135 | G/A | 0.026 | -0.004 | 0.082 | 0.963 | -0.105 | 0.291 | 0.719 | -      | -     | -     | -      | -     | -     |
| rs17695224 | G/A | 0.029 | -0.079 | 0.086 | 0.356 | 0.124  | 0.127 | 0.328 | 0.180  | 0.141 | 0.202 | 0.079  | 0.108 | 0.461 |
| rs7255436  | A/C | 0.032 | -0.027 | 0.057 | 0.638 | -0.289 | 0.110 | 0.008 | -      | -     | -     | -      | -     | -     |
| rs737337   | T/C | 0.056 | -0.016 | 0.109 | 0.886 | -0.067 | 0.227 | 0.768 | 0.068  | 0.130 | 0.600 | -0.071 | 0.096 | 0.460 |
| rs386000   | C/G | 0.048 | 0.017  | 0.130 | 0.899 | 0.082  | 0.089 | 0.357 | 0.034  | 0.111 | 0.759 | -0.020 | 0.087 | 0.818 |
| rs1800961  | C/T | 0.127 | -0.082 | 0.305 | 0.788 | -0.293 | 0.359 | 0.415 | -      | -     | -     | -      | -     | -     |

SUPPLEMENTARY DATA

|            |     |       |        |       |       |        |       |       |        |       |       |        |       |       |
|------------|-----|-------|--------|-------|-------|--------|-------|-------|--------|-------|-------|--------|-------|-------|
| rs6065906  | T/C | 0.059 | -0.035 | 0.118 | 0.767 | 0.107  | 0.250 | 0.670 | -      | -     | -     | -      | -     | -     |
| rs181362   | C/T | 0.038 | 0.124  | 0.113 | 0.271 | -0.182 | 0.195 | 0.349 | -0.023 | 0.108 | 0.831 | -0.153 | 0.082 | 0.063 |
| <b>LDL</b> |     |       |        |       |       |        |       |       |        |       |       |        |       |       |
| rs267733   | A/G | 0.033 | 0.092  | 0.087 | 0.292 | 0.069  | 0.420 | 0.869 | -      | -     | -     | -      | -     | -     |
| rs2479409  | G/A | 0.064 | -0.060 | 0.081 | 0.462 | -0.158 | 0.122 | 0.194 | -      | -     | -     | -      | -     | -     |
| rs629301   | T/G | 0.167 | -0.027 | 0.082 | 0.746 | 0.038  | 0.688 | 0.956 | 0.032  | 0.236 | 0.893 | -0.100 | 0.166 | 0.547 |
| rs2710642  | A/G | 0.024 | 0.055  | 0.091 | 0.543 | -0.167 | 0.128 | 0.193 | -      | -     | -     | -      | -     | -     |
| rs10490626 | G/A | 0.015 | -0.002 | 0.101 | 0.982 | 0.273  | 0.290 | 0.347 | -      | -     | -     | -      | -     | -     |
| rs2030746  | T/C | 0.021 | 0.039  | 0.041 | 0.336 | 0.136  | 0.129 | 0.294 | -      | -     | -     | -      | -     | -     |
| rs1250229  | C/T | 0.024 | 0.046  | 0.064 | 0.473 | 0.106  | 0.154 | 0.489 | -0.061 | 0.225 | 0.788 | 0.036  | 0.164 | 0.825 |
| rs1367117  | A/G | 0.1   | -0.104 | 0.063 | 0.098 | -0.264 | 0.140 | 0.060 | 0.082  | 0.172 | 0.633 | 0.003  | 0.119 | 0.978 |
| rs4299376  | G/T | 0.079 | 0.129  | 0.087 | 0.140 | 0.144  | 0.184 | 0.433 | -      | -     | -     | -      | -     | -     |
| rs7640978  | C/T | 0.039 | -0.011 | 0.104 | 0.916 | 0.253  | 0.225 | 0.260 | -      | -     | -     | -      | -     | -     |
| rs17404153 | G/T | 0.034 | -0.156 | 0.138 | 0.256 | 0.134  | 0.199 | 0.502 | -      | -     | -     | -      | -     | -     |
| rs4530754  | A/G | 0.028 | -0.040 | 0.080 | 0.618 | 0.072  | 0.221 | 0.744 | -      | -     | -     | -      | -     | -     |
| rs3757354  | C/T | 0.038 | -0.074 | 0.061 | 0.225 | -0.102 | 0.139 | 0.464 | -      | -     | -     | -      | -     | -     |
| rs1800562  | G/A | 0.062 | 0.036  | 0.235 | 0.878 | -0.003 | 0.010 | 0.773 | -      | -     | -     | -      | -     | -     |
| rs1564348  | C/T | 0.048 | 0.027  | 0.072 | 0.714 | 0.131  | 0.138 | 0.343 | -      | -     | -     | -      | -     | -     |
| rs4722551  | C/T | 0.039 | -0.006 | 0.069 | 0.927 | -0.021 | 0.095 | 0.822 | -      | -     | -     | -      | -     | -     |
| rs10102164 | A/G | 0.032 | 0.285  | 0.167 | 0.087 | -0.052 | 0.305 | 0.865 | -      | -     | -     | -      | -     | -     |
| rs11136341 | G/A | 0.045 | 0.104  | 0.085 | 0.219 | 0.110  | 0.160 | 0.490 | 0.181  | 0.160 | 0.257 | -0.028 | 0.127 | 0.825 |
| rs635634   | T/C |       | 0.075  | 0.098 | 0.444 | -0.040 | 0.388 | 0.917 | -      | -     | -     | -      | -     | -     |
| rs11220462 | A/G | 0.059 | 0.067  | 0.168 | 0.692 | 0.003  | 0.013 | 0.788 | 0.019  | 0.112 | 0.867 | 0.043  | 0.096 | 0.653 |
| rs4942486  | T/C | 0.024 | 0.085  | 0.066 | 0.198 | -0.024 | 0.099 | 0.807 | -0.007 | 0.108 | 0.950 | -0.033 | 0.084 | 0.699 |
| rs8017377  | A/G | 0.03  | 0.111  | 0.075 | 0.141 | -0.093 | 0.154 | 0.544 | -      | -     | -     | -      | -     | -     |
| rs1801689  | C/A | 0.103 | -0.744 | 1.023 | 0.467 | -      | -     | -     | -      | -     | -     | -      | -     | -     |
| rs7206971  | A/G | 0.029 | 0.062  | 0.062 | 0.314 | 0.036  | 0.064 | 0.571 | -0.265 | 0.126 | 0.036 | -0.015 | 0.100 | 0.883 |
| rs6511720  | G/T | 0.221 | -0.078 | 0.072 | 0.281 | -0.318 | 0.179 | 0.075 | -      | -     | -     | -      | -     | -     |
| rs4420638  | G/A | 0.225 | -0.082 | 0.120 | 0.495 | -0.206 | 0.193 | 0.285 | 0.176  | 0.196 | 0.370 | -0.112 | 0.144 | 0.438 |
| rs364585   | G/A | 0.025 | -0.080 | 0.109 | 0.467 | 0.015  | 0.067 | 0.826 | 0.007  | 0.106 | 0.951 | 0.077  | 0.083 | 0.353 |
| rs2328223  | C/A | 0.03  | -0.018 | 0.068 | 0.795 | -0.004 | 0.018 | 0.835 | -      | -     | -     | -      | -     | -     |
| rs6029526  | A/T | 0.044 | 0.141  | 0.075 | 0.059 | 0.081  | 0.120 | 0.497 | -0.112 | 0.140 | 0.422 | -0.068 | 0.106 | 0.517 |
| rs5763662  | T/C | 0.044 | -0.266 | 0.320 | 0.405 | 0.047  | 0.237 | 0.843 | -      | -     | -     | -      | -     | -     |

SUPPLEMENTARY DATA

**Triglyceride**

|                          |     |        |        |       |       |        |       |       |        |       |       |        |       |       |
|--------------------------|-----|--------|--------|-------|-------|--------|-------|-------|--------|-------|-------|--------|-------|-------|
| rs2131925                | T/G | 0.066  | 0.000  | 0.020 | 0.987 | 0.005  | 0.046 | 0.922 | 0.028  | 0.122 | 0.822 | -0.013 | 0.094 | 0.889 |
| rs1260326                | T/C | 0.115  | 0.083  | 0.072 | 0.251 | 0.124  | 0.193 | 0.522 | 0.090  | 0.109 | 0.409 | -0.009 | 0.085 | 0.912 |
| rs645040                 | T/G | 0.029  | -0.038 | 0.074 | 0.608 | -0.236 | 0.144 | 0.101 | -      | -     | -     | -      | -     | -     |
| rs6831256                | G/A | 0.026  | -0.039 | 0.048 | 0.414 | -0.032 | 0.202 | 0.875 | 0.162  | 0.110 | 0.143 | 0.027  | 0.086 | 0.753 |
| rs442177                 | T/G | 0.031  | -0.055 | 0.072 | 0.449 | -0.250 | 0.130 | 0.054 | -0.009 | 0.111 | 0.935 | -0.001 | 0.085 | 0.996 |
| rs9686661                | T/C | 0.038  | 0.012  | 0.054 | 0.822 | -0.135 | 0.200 | 0.499 | -      | -     | -     | -      | -     | -     |
| rs998584                 | A/C | 0.029  | 0.210  | 0.077 | 0.006 | 0.227  | 0.135 | 0.094 | -      | -     | -     | -      | -     | -     |
| rs38855                  | A/G | -0.019 | -0.090 | 0.082 | 0.273 | 0.149  | 0.143 | 0.297 | -      | -     | -     | -      | -     | -     |
| rs13238203               | C/T | 0.059  | -0.002 | 0.096 | 0.983 | 0.171  | 0.665 | 0.797 | -      | -     | -     | -      | -     | -     |
| rs17145738               | C/T | 0.115  | 0.074  | 0.107 | 0.490 | 0.558  | 0.220 | 0.011 | 0.075  | 0.191 | 0.697 | -0.048 | 0.139 | 0.730 |
| rs11776767               | C/G | 0.022  | 0.002  | 0.007 | 0.788 | 0.053  | 0.141 | 0.708 | -      | -     | -     | -      | -     | -     |
| rs1495741                | G/A | 0.04   | 0.170  | 0.084 | 0.043 | 0.296  | 0.144 | 0.040 | 0.034  | 0.109 | 0.757 | 0.100  | 0.084 | 0.232 |
| rs12678919               | A/G | 0.17   | 0.063  | 0.094 | 0.500 | 0.042  | 1.892 | 0.982 | 0.074  | 0.192 | 0.700 | 0.216  | 0.146 | 0.138 |
| rs2954029                | A/T | 0.076  | 0.000  | 0.029 | 0.991 | -0.036 | 0.123 | 0.770 | 0.158  | 0.108 | 0.142 | -0.001 | 0.085 | 0.989 |
| rs1832007                | A/G | -0.033 | -0.158 | 0.089 | 0.076 | -0.304 | 0.145 | 0.036 | 0.440  | 0.184 | 0.017 | 0.082  | 0.140 | 0.561 |
| rs10761731               | A/T | -0.031 | 0.012  | 0.054 | 0.828 | -0.012 | 0.069 | 0.863 | -0.098 | 0.120 | 0.415 | -0.238 | 0.135 | 0.077 |
| rs2068888                | G/A | -0.024 | 0.004  | 0.017 | 0.820 | 0.040  | 0.093 | 0.669 | 0.052  | 0.133 | 0.693 | 0.022  | 0.100 | 0.827 |
| rs174546                 | T/C | 0.045  | -0.131 | 0.080 | 0.100 | -0.289 | 0.144 | 0.044 | 0.037  | 0.109 | 0.735 | -0.040 | 0.086 | 0.644 |
| rs964184                 | G/C | 0.234  | 0.116  | 0.124 | 0.348 | 0.141  | 0.219 | 0.520 | -0.024 | 0.129 | 0.855 | -0.109 | 0.104 | 0.292 |
| rs11613352               | C/T | 0.028  | -0.007 | 0.012 | 0.551 | -0.014 | 0.028 | 0.613 | -      | -     | -     | -      | -     | -     |
| rs2412710                | A/G | 0.099  | 0.009  | 0.041 | 0.817 | 0.154  | 1.630 | 0.925 | -      | -     | -     | -      | -     | -     |
| rs2929282                | T/A | 0.072  | -0.153 | 0.187 | 0.415 | 0.370  | 0.353 | 0.295 | -      | -     | -     | -      | -     | -     |
| rs3198697                | C/T | 0.02   | 0.054  | 0.076 | 0.478 | 0.101  | 0.126 | 0.422 | -      | -     | -     | -      | -     | -     |
| rs11649653               | C/G | 0.027  | 0.000  | 0.046 | 0.995 | 0.111  | 0.117 | 0.341 | -      | -     | -     | -      | -     | -     |
| rs8077889                | C/A | 0.025  | 0.071  | 0.078 | 0.362 | -0.100 | 0.188 | 0.594 | -      | -     | -     | -      | -     | -     |
| rs7248104                | G/A | 0.022  | -0.027 | 0.055 | 0.624 | -0.110 | 0.132 | 0.405 | -      | -     | -     | -      | -     | -     |
| rs731839                 | G/A | 0.022  | -0.017 | 0.045 | 0.701 | -0.066 | 0.106 | 0.537 | -      | -     | -     | -      | -     | -     |
| rs5756931                | T/C | 0.02   | 0.081  | 0.052 | 0.120 | 0.071  | 0.075 | 0.343 | -      | -     | -     | -      | -     | -     |
| <b>Total Cholesterol</b> |     |        |        |       |       |        |       |       |        |       |       |        |       |       |
| rs1077514                | T/C | 0.03   | -0.030 | 0.110 | 0.786 | 0.048  | 0.235 | 0.838 | -      | -     | -     | -      | -     | -     |
| rs12027135               | T/A | 0.027  | 0.030  | 0.099 | 0.762 | -0.069 | 0.303 | 0.821 | -      | -     | -     | -      | -     | -     |
| rs7515577                | A/C | 0.037  | 0.138  | 0.129 | 0.287 | 0.093  | 0.188 | 0.620 | -      | -     | -     | -      | -     | -     |

SUPPLEMENTARY DATA

|            |     |        |        |       |       |        |       |       |   |   |   |   |   |   |
|------------|-----|--------|--------|-------|-------|--------|-------|-------|---|---|---|---|---|---|
| rs2642442  | T/C | 0.035  | -0.008 | 0.068 | 0.911 | -0.014 | 0.640 | 0.982 | - | - | - | - | - | - |
| rs514230   | T/A | 0.039  | -0.106 | 0.100 | 0.289 | -0.074 | 0.159 | 0.644 | - | - | - | - | - | - |
| rs2287623  | G/A | 0.027  | -0.219 | 0.101 | 0.030 | -0.053 | 0.169 | 0.752 | - | - | - | - | - | - |
| rs11694172 | G/A | 0.028  | 0.032  | 0.095 | 0.735 | 0.151  | 0.174 | 0.386 | - | - | - | - | - | - |
| rs11563251 | T/C | 0.037  | 0.236  | 0.122 | 0.053 | 0.021  | 0.172 | 0.901 | - | - | - | - | - | - |
| rs7570971  | A/C | 0.03   | 0.188  | 0.146 | 0.198 | -      | -     | -     | - | - | - | - | - | - |
| rs13315871 | G/A | 0.036  | 0.164  | 0.110 | 0.136 | 0.040  | 0.140 | 0.777 | - | - | - | - | - | - |
| rs2290159  | G/C | 0.037  | -0.009 | 0.014 | 0.539 | -0.108 | 0.195 | 0.580 | - | - | - | - | - | - |
| rs12916    | C/T | 0.073  | 0.123  | 0.070 | 0.076 | 0.034  | 0.087 | 0.700 | - | - | - | - | - | - |
| rs6882076  | C/T | 0.051  | 0.107  | 0.065 | 0.097 | -0.061 | 0.231 | 0.793 | - | - | - | - | - | - |
| rs2758886  | A/G | 0.023  | -0.168 | 0.100 | 0.095 | -0.059 | 0.096 | 0.534 | - | - | - | - | - | - |
| rs9376090  | T/C | -0.025 | -0.081 | 0.091 | 0.375 | -0.018 | 0.158 | 0.908 | - | - | - | - | - | - |
| rs3177928  | A/G | 0.048  | 0.028  | 0.534 | 0.959 | -      | -     | -     | - | - | - | - | - | - |
| rs2814982  | C/T | 0.044  | 0.074  | 0.104 | 0.476 | 0.121  | 0.194 | 0.534 | - | - | - | - | - | - |
| rs9488822  | A/T | -0.034 | -0.053 | 0.057 | 0.357 | -0.291 | 0.125 | 0.020 | - | - | - | - | - | - |
| rs1997243  | G/A | 0.033  | -0.009 | 0.116 | 0.941 | -0.077 | 0.096 | 0.420 | - | - | - | - | - | - |
| rs12670798 | C/T | 0.034  | -0.038 | 0.081 | 0.642 | -0.242 | 0.191 | 0.205 | - | - | - | - | - | - |
| rs2072183  | C/G | 0.036  | 0.089  | 0.097 | 0.355 | 0.400  | 0.156 | 0.011 | - | - | - | - | - | - |
| rs2081687  | T/C | 0.038  | 0.081  | 0.079 | 0.303 | 0.262  | 0.142 | 0.066 | - | - | - | - | - | - |
| rs3780181  | A/G | 0.044  | -0.018 | 0.118 | 0.879 | -0.163 | 0.186 | 0.381 | - | - | - | - | - | - |
| rs10904908 | G/A | 0.025  | -0.014 | 0.067 | 0.839 | -0.101 | 0.088 | 0.250 | - | - | - | - | - | - |
| rs2255141  | A/G | 0.031  | -0.104 | 0.060 | 0.081 | -0.079 | 0.085 | 0.351 | - | - | - | - | - | - |
| rs11603023 | T/C | 0.022  | -0.012 | 0.021 | 0.580 | 0.049  | 0.078 | 0.525 | - | - | - | - | - | - |
| rs10128711 | C/T | 0.031  | -0.009 | 0.065 | 0.886 | -0.106 | 0.148 | 0.476 | - | - | - | - | - | - |
| rs7941030  | C/T | 0.028  | 0.064  | 0.068 | 0.352 | 0.071  | 0.107 | 0.506 | - | - | - | - | - | - |
| rs4883201  | A/G | 0.035  | -0.169 | 0.093 | 0.068 | -0.040 | 0.188 | 0.830 | - | - | - | - | - | - |
| rs11065987 | A/G | 0.031  | 0.024  | 0.067 | 0.716 | 0.078  | 0.135 | 0.563 | - | - | - | - | - | - |
| rs1169288  | C/A | 0.032  | 0.113  | 0.085 | 0.185 | 0.184  | 0.156 | 0.240 | - | - | - | - | - | - |
| rs2000999  | A/G | 0.065  | -0.099 | 0.101 | 0.327 | 0.274  | 0.150 | 0.069 | - | - | - | - | - | - |
| rs314253   | T/C | 0.023  | 0.001  | 0.079 | 0.987 | 0.118  | 0.267 | 0.659 | - | - | - | - | - | - |
| rs10401969 | T/C | 0.137  | -0.004 | 0.033 | 0.908 | -0.095 | 0.265 | 0.721 | - | - | - | - | - | - |
| rs492602   | G/A | 0.031  | -0.009 | 0.060 | 0.877 | 0.107  | 0.132 | 0.414 | - | - | - | - | - | - |
| rs2277862  | C/T | 0.035  | 0.047  | 0.081 | 0.564 | -0.118 | 0.304 | 0.698 | - | - | - | - | - | - |

SUPPLEMENTARY DATA

|           |     |       |        |       |       |        |       |       |   |   |   |   |   |   |
|-----------|-----|-------|--------|-------|-------|--------|-------|-------|---|---|---|---|---|---|
| rs2902940 | A/G | 0.024 | 0.066  | 0.098 | 0.502 | -0.074 | 0.089 | 0.401 | - | - | - | - | - | - |
| rs138777  | A/G | 0.021 | -0.009 | 0.013 | 0.505 | -0.175 | 0.135 | 0.192 | - | - | - | - | - | - |
| rs4253772 | T/C | 0.032 | 0.147  | 0.105 | 0.158 | 0.255  | 0.176 | 0.146 | - | - | - | - | - | - |

SUPPLEMENTARY DATA

**Supplementary Table 5.** Instrumental variable SNPs for triglycerides and at least one other lipid fraction that were used in the Mendelian randomization analysis and are near PPAR- $\alpha$  target genes.

| SNPrsID    | Chr | hg19 Position (Mb) | Nearest PPAR- $\alpha$ Target Gene | hg19 Position of Gene (Mb) | Function of PPAR- $\alpha$ Target Gene |
|------------|-----|--------------------|------------------------------------|----------------------------|----------------------------------------|
| rs12678919 | 8   | 19.84              | LPL                                | 19.80-19.82                | Lipoprotein uptake and metabolism      |
| rs174546   | 11  | 61.57              | FADS1                              | 61.567-61.584              | Lipogenesis                            |
| rs964184   | 11  | 116.65             | APOA5                              | 116.660-116.663            | Lipoprotein uptake and metabolism      |

**Supplementary Table 6.** Post hoc power calculations for lipid-DR association using Mendelian randomization approach.

| Phenotype | No. Cases/controls          | Odds Ratio |      |      |      |      |
|-----------|-----------------------------|------------|------|------|------|------|
|           |                             | 1.1        | 1.2  | 1.23 | 1.3  | 1.4  |
| Any DR    | 2,969 cases/ 4,096 controls | 0.24       | 0.68 | 0.80 | 0.94 | 1.00 |
| Severe DR | 1277 cases/ 3980 controls   | 0.16       | 0.47 | 0.58 | 0.79 | 0.95 |

**Supplementary Table 7.** Mendelian Randomization Estimate of the Association between Lipids and Diabetic Retinopathy in Chinese using only Genome-wide Significant SNPs.

|               | Any DR (N = 273 cases, 826 controls) |                     |         |                    | Severe DR (N = 524 cases, 1296 controls) |                    |         |                    |
|---------------|--------------------------------------|---------------------|---------|--------------------|------------------------------------------|--------------------|---------|--------------------|
|               | No. of SNP*                          | OR (95% CI)         | P value | I <sup>2</sup> , % | No. of SNP*                              | OR (95% CI)        | P value | I <sup>2</sup> , % |
| HDL           | 3                                    | 1.05 (0.38 – 2.88)  | 0.923   | 73.0               | 3                                        | 0.98 (0.46 – 2.08) | 0.951   | 60.9               |
| LDL           | 2                                    | 1.96 (0.25 – 15.16) | 0.520   | 0.0                | 2                                        | 0.50 (0.11 – 2.14) | 0.347   | 0.0                |
| Triglycerides | 6                                    | 1.42 (0.61 – 3.30)  | 0.422   | 0.0                | 6                                        | 0.87 (0.45 – 1.70) | 0.684   | 0.0                |

HDL = high-density lipoprotein cholesterol; LDL = low-density lipoprotein cholesterol; OR = odds ratio

\*Number of SNPs included in meta-analysis.

HDL: rs1532085, rs1883025, rs3764261; LDL: rs4420638, rs629301; Triglyceride: rs1260326, rs12678919, rs17145738, rs2131925, rs2954029, rs964184.



SUPPLEMENTARY DATA

**Supplementary Table 8.** Comparison of results for lipid-associated SNPs in Caucasians identified by the Global Lipids Genetic Consortium (GLGC) to findings from genetic studies of lipid levels in Hispanics.

| SNP        | EA/RA | GLGC   |          | Below et al |         | Zubair et al |         | Coram et al |         |
|------------|-------|--------|----------|-------------|---------|--------------|---------|-------------|---------|
|            |       | Beta   | P Value  | $\beta$     | P Value | $\beta$      | P Value | $\beta$     | P Value |
| <b>HDL</b> |       |        |          |             |         |              |         |             |         |
| rs11613352 | T/C   | 0.028  | 2.0E-13  | -           | -       | 0.300        | 6.3E-03 | -           | -       |
| rs11869286 | G/C   | -0.032 | 3.0E-17  | -           | -       | 0.280        | 5.3E-02 | -           | -       |
| rs12328675 | C/T   | 0.045  | 2.0E-15  | -           | -       | 0.600        | 1.2E-02 | -           | -       |
| rs12678919 | G/A   | 0.155  | 1.0E-149 | -           | -       | 1.580        | 2.9E-09 | -           | -       |
| rs1532085  | A/G   | 0.107  | 1.0E-188 | -           | -       | 1.290        | 1.4E-16 | -           | -       |
| rs16942887 | A/G   | 0.083  | 8.0E-54  | -           | -       | 1.180        | 1.3E-09 | -           | -       |
| rs17145738 | T/C   | 0.041  | 5.0E-13  | -           | -       | 0.340        | 2.2E-01 | -           | -       |
| rs174546   | T/C   | -0.039 | 8.0E-28  | -           | -       | -            | -       | -           | -       |
| rs1800961  | T/C   | -0.127 | 2.0E-34  | -           | -       | -2.520       | 5.2E-13 | -           | -       |
| rs2652834  | A/G   | -0.028 | 4.0E-11  | -           | -       | -0.220       | 2.8E-01 | -           | -       |
| rs2954029  | T/A   | 0.040  | 3.0E-29  | -           | -       | 0.300        | 4.4E-02 | -           | -       |
| rs3136441  | C/T   | 0.054  | 7.0E-29  | -           | -       | 0.150        | 3.7E-01 | -           | -       |
| rs3764261  | A/C   | 0.241  | 1E-769   | -           | -       | 2.900        | 3.8E-76 | -           | -       |
| rs386000   | C/G   | 0.048  | 3.0E-23  | -           | -       | -0.470       | 5.8E-03 | -           | -       |
| rs4148008  | G/C   | -0.028 | 1.0E-12  | -           | -       | -0.260       | 1.1E-01 | -           | -       |
| rs4846914  | G/A   | -0.048 | 4.0E-41  | -           | -       | -0.380       | 9.9E-03 | -           | -       |
| rs581080   | G/C   | -0.042 | 1.0E-19  | -           | -       | 0.060        | 7.4E-01 | -           | -       |
| rs6065906  | C/T   | -0.059 | 5.0E-40  | -           | -       | -0.540       | 1.1E-02 | -           | -       |
| rs838880   | C/T   | 0.048  | 6.0E-32  | -           | -       | 0.180        | 2.2E-01 | -           | -       |
| rs964184   | C/G   | 0.106  | 6.0E-48  | -           | -       | -            | -       | -0.046      | 2.8E-12 |
| rs10019888 | G/A   | -0.027 | 5.0E-08  | -           | -       | -            | -       | -           | -       |
| rs1047891  | A/C   | -0.027 | 9.0E-10  | -           | -       | -            | -       | -           | -       |
| rs1121980  | A/G   | -0.020 | 7.0E-09  | -           | -       | -            | -       | -           | -       |
| rs11246602 | C/T   | 0.034  | 2.0E-10  | -           | -       | -            | -       | -           | -       |
| rs12145743 | G/T   | 0.020  | 2.0E-08  | -           | -       | -            | -       | -           | -       |
| rs12748152 | T/C   | -0.051 | 1.0E-15  | -           | -       | -            | -       | -           | -       |
| rs12801636 | A/G   | 0.024  | 3.0E-08  | -           | -       | -            | -       | -           | -       |
| rs12967135 | A/G   | -0.026 | 4.0E-08  | -           | -       | -            | -       | -           | -       |
| rs13107325 | T/C   | -0.071 | 1.0E-15  | -           | -       | -            | -       | -           | -       |
| rs13326165 | A/G   | 0.029  | 9.0E-11  | -           | -       | -            | -       | -           | -       |
| rs1689800  | G/A   | -0.034 | 5.0E-20  | -           | -       | -            | -       | -           | -       |
| rs17173637 | C/T   | -0.036 | 2.0E-08  | -           | -       | -            | -       | -           | -       |
| rs17695224 | A/G   | -0.029 | 2.0E-13  | -           | -       | -            | -       | -           | -       |
| rs181362   | T/C   | -0.038 | 4.0E-18  | -           | -       | -            | -       | -           | -       |
| rs1883025  | T/C   | -0.070 | 2.0E-65  | -           | -       | -            | -       | -           | -       |
| rs1936800  | C/T   | 0.020  | 3.0E-10  | -           | -       | -            | -       | -           | -       |
| rs2013208  | T/C   | 0.025  | 9.0E-12  | -           | -       | -            | -       | -           | -       |
| rs2290547  | A/G   | -0.030 | 4.0E-09  | -           | -       | -            | -       | -           | -       |
| rs2293889  | T/G   | -0.031 | 4.0E-17  | -           | -       | -            | -       | -           | -       |
| rs2602836  | A/G   | 0.019  | 5.0E-08  | -           | -       | -            | -       | -           | -       |
| rs2606736  | C/T   | 0.025  | 5.0E-08  | -           | -       | -            | -       | -           | -       |
| rs2923084  | G/A   | -0.026 | 5.0E-08  | -           | -       | -            | -       | -           | -       |
| rs2925979  | T/C   | -0.035 | 1.0E-19  | -           | -       | -            | -       | -           | -       |
| rs2972146  | G/T   | 0.032  | 2.0E-17  | -           | -       | -            | -       | -           | -       |
| rs3822072  | A/G   | -0.025 | 4.0E-12  | -           | -       | -            | -       | -           | -       |
| rs4129767  | G/A   | -0.024 | 2.0E-11  | -           | -       | -            | -       | -           | -       |
| rs4142995  | T/G   | -0.026 | 9.0E-12  | -           | -       | -            | -       | -           | -       |
| rs4420638  | G/A   | -0.067 | 2.0E-21  | -           | -       | -            | -       | -           | -       |
| rs4650994  | G/A   | 0.021  | 7.0E-09  | -           | -       | -            | -       | -           | -       |
| rs4660293  | G/A   | -0.035 | 3.0E-18  | -           | -       | -            | -       | -           | -       |
| rs4731702  | T/C   | 0.029  | 5.0E-17  | -           | -       | -            | -       | -           | -       |

SUPPLEMENTARY DATA

|            |     |        |          |   |   |        |         |   |   |
|------------|-----|--------|----------|---|---|--------|---------|---|---|
| rs4759375  | T/C | 0.056  | 3.0E-08  | - | - | -      | -       | - | - |
| rs4765127  | T/G | 0.032  | 8.0E-10  | - | - | -      | -       | - | - |
| rs4917014  | G/T | 0.022  | 1.0E-08  | - | - | -      | -       | - | - |
| rs4983559  | G/A | 0.020  | 1.0E-08  | - | - | -      | -       | - | - |
| rs499974   | A/C | -0.026 | 1.0E-08  | - | - | -      | -       | - | - |
| rs605066   | C/T | -0.028 | 3.0E-08  | - | - | -      | -       | - | - |
| rs6450176  | A/G | -0.025 | 7.0E-10  | - | - | -      | -       | - | - |
| rs6805251  | T/C | 0.020  | 1.0E-08  | - | - | -      | -       | - | - |
| rs702485   | G/A | 0.024  | 7.0E-12  | - | - | -      | -       | - | - |
| rs7134375  | A/C | 0.021  | 1.0E-08  | - | - | -      | -       | - | - |
| rs7134594  | C/T | -0.035 | 2.0E-13  | - | - | -      | -       | - | - |
| rs7241918  | G/T | -0.090 | 1.0E-44  | - | - | -      | -       | - | - |
| rs7255436  | C/A | -0.032 | 2.0E-08  | - | - | -      | -       | - | - |
| rs731839   | G/A | -0.022 | 3.0E-09  | - | - | -      | -       | - | - |
| rs737337   | C/T | -0.056 | 5.0E-17  | - | - | -      | -       | - | - |
| rs7941030  | C/T | 0.027  | 1.0E-14  | - | - | -      | -       | - | - |
| rs970548   | C/A | 0.026  | 2.0E-10  | - | - | -      | -       | - | - |
| rs998584   | A/C | -0.026 | 2.0E-11  | - | - | -      | -       | - | - |
| rs9987289  | A/G | -0.082 | 2.0E-41  | - | - | -      | -       | - | - |
| rs17404153 | T/G | 0.028  | 5.0E-09  | - | - | -      | -       | - | - |
| <b>LDL</b> |     |        |          |   |   |        |         |   |   |
| rs11220462 | A/G | 0.059  | 7.0E-21  | - | - | 1.940  | 3.2E-01 | - | - |
| rs12027135 | A/T | -0.030 | 2.0E-14  | - | - | 0.730  | 9.0E-02 | - | - |
| rs12916    | C/T | 0.073  | 5.8E-77  | - | - | 3.280  | 3.9E-13 | - | - |
| rs1367117  | A/G | 0.119  | 1.0E-182 | - | - | 3.970  | 8.4E-12 | - | - |
| rs2000999  | A/G | 0.065  | 4.0E-41  | - | - | 2.310  | 2.2E-04 | - | - |
| rs2479409  | G/A | 0.064  | 3.0E-50  | - | - | 1.470  | 1.1E-03 | - | - |
| rs2902940  | G/A | -0.027 | 2.0E-11  | - | - | -0.370 | 4.3E-01 | - | - |
| rs2954029* | T/A | -0.056 | 2.0E-50  | - | - | -2.760 | 5.5E-10 | - | - |
| rs3757354  | T/C | -0.038 | 2.0E-17  | - | - | -1.600 | 6.8E-04 | - | - |
| rs3764261  | A/C | -0.053 | 2.0E-34  | - | - | -0.520 | 2.8E-01 | - | - |
| rs4299376  | G/T | 0.081  | 4.0E-72  | - | - | 2.830  | 7.1E-07 | - | - |
| rs6511720  | T/G | -0.221 | 4.0E-262 | - | - | -6.710 | 3.5E-19 | - | - |
| rs6882076  | T/C | -0.046 | 3.0E-31  | - | - | -1.690 | 3.7E-04 | - | - |
| rs9987289  | A/G | -0.071 | 9.0E-24  | - | - | -1.000 | 8.4E-02 | - | - |
| rs10102164 | A/G | 0.032  | 4E-11    | - | - | -      | -       | - | - |
| rs10401969 | C/T | -0.118 | 3.0E-54  | - | - | -      | -       | - | - |
| rs10490626 | A/G | -0.015 | 2.0E-12  | - | - | -      | -       | - | - |
| rs11065987 | G/A | -0.027 | 1.0E-11  | - | - | -      | -       | - | - |
| rs11136341 | G/A | 0.045  | 7.0E-12  | - | - | -      | -       | - | - |
| rs11563251 | T/C | 0.034  | 5E-8     | - | - | -      | -       | - | - |
| rs1169288  | C/A | 0.038  | 6.0E-21  | - | - | -      | -       | - | - |
| rs1250229  | T/C | -0.024 | 3E-8     | - | - | -      | -       | - | - |
| rs12670798 | C/T | 0.034  | 5.0E-14  | - | - | -      | -       | - | - |
| rs12748152 | T/C | 0.050  | 3.0E-12  | - | - | -      | -       | - | - |
| rs1564348  | C/T | 0.048  | 3.0E-21  | - | - | -      | -       | - | - |
| rs17404153 | T/G | -0.034 | 2.0E-09  | - | - | -      | -       | - | - |
| rs174546   | T/C | -0.051 | 2.0E-39  | - | - | -      | -       | - | - |
| rs1800562  | A/G | -0.062 | 8.0E-14  | - | - | -      | -       | - | - |
| rs1801689  | C/A | 0.103  | 1E-11    | - | - | -      | -       | - | - |
| rs2030746  | T/C | 0.021  | 9.0E-09  | - | - | -      | -       | - | - |
| rs2072183  | C/G | 0.039  | 7.0E-16  | - | - | -      | -       | - | - |
| rs2081687  | T/C | 0.031  | 1.0E-07  | - | - | -      | -       | - | - |
| rs2131925  | G/T | -0.049 | 3.0E-32  | - | - | -      | -       | - | - |
| rs2255141  | A/G | 0.030  | 1.0E-13  | - | - | -      | -       | - | - |
| rs2328223  | C/A | 0.030  | 6E-9     | - | - | -      | -       | - | - |
| rs2642442  | C/T | -0.036 | 5.0E-11  | - | - | -      | -       | - | - |
| rs267733   | G/A | -0.033 | 5E-9     | - | - | -      | -       | - | - |
| rs2710642  | G/A | -0.024 | 6E-9     | - | - | -      | -       | - | - |

SUPPLEMENTARY DATA

|                          |     |        |          |        |         |   |   |   |   |
|--------------------------|-----|--------|----------|--------|---------|---|---|---|---|
| rs314253                 | C/T | -0.024 | 3.0E-10  | -      | -       | - | - | - | - |
| rs3177928                | A/G | 0.045  | 3.0E-17  | -      | -       | - | - | - | - |
| rs364585                 | A/G | -0.025 | 4E-10    | -      | -       | - | - | - | - |
| rs3780181                | G/A | -0.044 | 2E-9     | -      | -       | - | - | - | - |
| rs4253772                | T/C | -0.031 | 3.0E-08  | -      | -       | - | - | - | - |
| rs4420638                | G/A | 0.225  | 2.0E-178 | -      | -       | - | - | - | - |
| rs4530754                | G/A | -0.028 | 4.0E-12  | -      | -       | - | - | - | - |
| rs4722551                | C/T | 0.039  | 4E-14    | -      | -       | - | - | - | - |
| rs4942486                | T/C | 0.024  | 2E-11    | -      | -       | - | - | - | - |
| rs514230                 | A/T | -0.036 | 9.0E-12  | -      | -       | - | - | - | - |
| rs5763662                | T/C | 0.077  | 1E-8     | -      | -       | - | - | - | - |
| rs6029526                | A/T | 0.044  | 5.0E-18  | -      | -       | - | - | - | - |
| rs629301                 | G/T | -0.167 | 5.0E-241 | -      | -       | - | - | - | - |
| rs7206971                | A/G | 0.029  | 3.0E-07  | -      | -       | - | - | - | - |
| rs7640978                | T/C | -0.039 | 1E-8     | -      | -       | - | - | - | - |
| rs8017377                | A/G | 0.030  | 3.0E-15  | -      | -       | - | - | - | - |
| rs9411489                | T/C | 0.077  | 2.0E-41  | -      | -       | - | - | - | - |
| rs9488822                | T/A | 0.031  | 2.0E-07  | -      | -       | - | - | - | - |
| rs964184                 | C/G | -0.086 | 2.0E-26  | -      | -       | - | - | - | - |
| rs6831256                | G/A | -0.025 | 2.0E-08  | -      | -       | - | - | - | - |
| <b>Total Cholesterol</b> |     |        |          |        |         |   |   |   |   |
| rs10102164               | A/G | 0.030  | 5.0E-11  | 0.024  | 4.6E-01 | - | - | - | - |
| rs10401969               | C/T | -0.137 | 4.0E-77  | -0.215 | 7.8E-05 | - | - | - | - |
| rs1077514                | C/T | -0.030 | 6.0E-09  | -0.015 | 5.6E-01 | - | - | - | - |
| rs10904908               | G/A | 0.025  | 3.0E-11  | -0.008 | 7.5E-01 | - | - | - | - |
| rs11220462               | A/G | 0.047  | 6.0E-15  | 0.040  | 2.3E-01 | - | - | - | - |
| rs11563251               | T/C | 0.037  | 1.0E-09  | 0.023  | 6.3E-01 | - | - | - | - |
| rs11694172               | G/A | 0.028  | 2.0E-09  | -0.002 | 9.3E-01 | - | - | - | - |
| rs12670798               | C/T | 0.036  | 1.0E-16  | -0.041 | 1.5E-01 | - | - | - | - |
| rs12916                  | C/T | 0.068  | 5.0E-74  | 0.051  | 1.8E-02 | - | - | - | - |
| rs13315871               | A/G | -0.036 | 4.0E-08  | -0.021 | 6.8E-01 | - | - | - | - |
| rs138777                 | A/G | 0.021  | 5.0E-08  | 0.030  | 1.8E-01 | - | - | - | - |
| rs1800961                | T/C | -0.106 | 1.0E-24  | -0.050 | 4.4E-01 | - | - | - | - |
| rs1883025                | T/C | -0.067 | 6.0E-53  | -0.092 | 1.2E-04 | - | - | - | - |
| rs1997243                | G/A | 0.033  | 3.0E-10  | -0.015 | 7.4E-01 | - | - | - | - |
| rs2000999                | A/G | 0.062  | 7.0E-41  | 0.052  | 8.1E-02 | - | - | - | - |
| rs2030746                | T/C | 0.020  | 4.0E-08  | -0.034 | 1.4E-01 | - | - | - | - |
| rs2255141                | A/G | 0.031  | 7.0E-16  | 0.013  | 5.8E-01 | - | - | - | - |
| rs2287623                | G/A | 0.027  | 4.0E-12  | 0.009  | 6.9E-01 | - | - | - | - |
| rs2954029                | T/A | -0.062 | 2.0E-65  | -0.097 | 1.4E-05 | - | - | - | - |
| rs314253                 | C/T | -0.023 | 3.0E-10  | -0.002 | 9.3E-01 | - | - | - | - |
| rs3757354                | T/C | -0.035 | 2.0E-15  | -0.020 | 3.9E-01 | - | - | - | - |
| rs3780181                | G/A | -0.044 | 7.0E-10  | -0.023 | 5.1E-01 | - | - | - | - |
| rs4253772                | T/C | 0.032  | 1.0E-08  | 0.095  | 5.1E-02 | - | - | - | - |
| rs4530754                | G/A | -0.023 | 2.0E-09  | 0.001  | 9.6E-01 | - | - | - | - |
| rs4722551                | C/T | 0.023  | 7.0E-09  | -0.026 | 3.7E-01 | - | - | - | - |
| rs4883201                | G/A | -0.035 | 2.0E-09  | -0.026 | 5.7E-01 | - | - | - | - |
| rs581080                 | G/C | -0.038 | 1.0E-13  | -0.040 | 2.9E-01 | - | - | - | - |
| rs6511720                | T/G | -0.185 | 5.0E-202 | -0.111 | 1.9E-02 | - | - | - | - |
| rs6882076                | T/C | -0.051 | 5.0E-04  | -0.040 | 1.6E-01 | - | - | - | - |
| rs7640978                | T/C | -0.038 | 1.0E-08  | -0.031 | 5.5E-01 | - | - | - | - |
| rs9376090                | T/C | -0.025 | 3.0E-09  | 0.034  | 3.0E-01 | - | - | - | - |
| rs964184                 | C/G | -0.121 | 3.0E-55  | 0.116  | 3.2E-07 | - | - | - | - |
| rs9987289                | A/G | -0.084 | 2.0E-36  | -0.066 | 6.8E-03 | - | - | - | - |
| rs10128711               | T/C | -0.031 | 1.0E-11  | -      | -       | - | - | - | - |
| rs11065987               | G/A | -0.031 | 2.0E-16  | -      | -       | - | - | - | - |
| rs11136341               | G/A | 0.038  | 6.0E-09  | -      | -       | - | - | - | - |
| rs11603023               | T/C | 0.022  | 1E-8     | -      | -       | - | - | - | - |
| rs1169288                | C/A | 0.032  | 4.0E-17  | -      | -       | - | - | - | - |

SUPPLEMENTARY DATA

|                      |     |        |          |        |         |        |         |   |   |
|----------------------|-----|--------|----------|--------|---------|--------|---------|---|---|
| rs12027135           | A/T | -0.027 | 5.0E-12  | -      | -       | -      | -       | - | - |
| rs1260326            | T/C | 0.051  | 3.0E-42  | -      | -       | -      | -       | - | - |
| rs1367117            | A/G | 0.100  | 3.0E-139 | -      | -       | -      | -       | - | - |
| rs1495741            | G/A | 0.032  | 3.0E-08  | -      | -       | -      | -       | - | - |
| rs1532085            | A/G | 0.054  | 7.0E-47  | -      | -       | -      | -       | - | - |
| rs1564348            | C/T | 0.049  | 3.0E-23  | -      | -       | -      | -       | - | - |
| rs174546             | T/C | -0.048 | 3.0E-37  | -      | -       | -      | -       | - | - |
| rs1800562            | A/G | -0.056 | 2.0E-12  | -      | -       | -      | -       | - | - |
| rs2072183            | C/G | 0.036  | 4.0E-15  | -      | -       | -      | -       | - | - |
| rs2081687            | T/C | 0.038  | 9.0E-12  | -      | -       | -      | -       | - | - |
| rs2131925            | G/T | -0.075 | 4.0E-80  | -      | -       | -      | -       | - | - |
| rs2277862            | T/C | -0.035 | 5.0E-11  | -      | -       | -      | -       | - | - |
| rs2290159            | C/G | -0.037 | 2.0E-09  | -      | -       | -      | -       | - | - |
| rs2479409            | G/A | 0.054  | 2.0E-39  | -      | -       | -      | -       | - | - |
| rs2642442            | C/T | -0.035 | 3.0E-11  | -      | -       | -      | -       | - | - |
| rs2758886            | A/G | 0.023  | 3E-8     | -      | -       | -      | -       | - | - |
| rs2814982            | T/C | -0.044 | 4.0E-15  | -      | -       | -      | -       | - | - |
| rs2902940            | G/A | -0.024 | 9E-10/   | -      | -       | -      | -       | - | - |
| rs3177928            | A/G | 0.048  | 1.0E-21  | -      | -       | -      | -       | - | - |
| rs3764261            | A/C | 0.050  | 4.0E-31  | -      | -       | -      | -       | - | - |
| rs4299376            | G/T | 0.079  | 3.0E-73  | -      | -       | -      | -       | - | - |
| rs4420638            | G/A | 0.197  | 1.0E-149 | -      | -       | -      | -       | - | - |
| rs492602             | G/A | 0.031  | 1.0E-16  | -      | -       | -      | -       | - | - |
| rs514230             | A/T | -0.039 | 5.0E-14  | -      | -       | -      | -       | - | - |
| rs6029526            | A/T | 0.040  | 1.0E-16  | -      | -       | -      | -       | - | - |
| rs629301             | G/T | -0.134 | 2.0E-170 | -      | -       | -      | -       | - | - |
| rs7206971            | A/G | 0.030  | 1.0E-07  | -      | -       | -      | -       | - | - |
| rs7241918            | G/T | -0.058 | 4.0E-18  | -      | -       | -      | -       | - | - |
| rs7515577            | C/A | -0.037 | 2.0E-08  | -      | -       | -      | -       | - | - |
| rs7570971            | A/C | 0.030  | 1.0E-13  | -      | -       | -      | -       | - | - |
| rs7941030            | C/T | 0.028  | 2.0E-14  | -      | -       | -      | -       | - | - |
| rs9411489            | T/C | 0.069  | 3.0E-35  | -      | -       | -      | -       | - | - |
| rs9488822            | T/A | 0.034  | 1.0E-09  | -      | -       | -      | -       | - | - |
| rs970548             | C/A | -0.026 | 8.0E-09  | -      | -       | -      | -       | - | - |
| rs10490626           | A/G | 0.042  | 6.0E-09  | -      | -       | -      | -       | - | - |
| rs6831256            | G/A | -0.022 | 1.0E-10  | -      | -       | -      | -       | - | - |
| <b>Triglycerides</b> |     |        |          |        |         |        |         |   |   |
| rs10401969           | C/T | -0.121 | 1.0E-69  | -0.198 | 3.0E-04 | -0.050 | 7.0E-08 | - | - |
| rs11613352           | T/C | -0.028 | 9.0E-14  | -0.013 | 5.5E-01 | 0.000  | 6.0E-01 | - | - |
| rs11776767           | C/G | 0.022  | 3.0E-11  | -      | -       | 0.010  | 3.4E-01 | - | - |
| rs1260326            | T/C | 0.115  | 2.0E-239 | 0.094  | 4.2E-05 | 0.070  | 2.3E-15 | - | - |
| rs12678919           | G/A | -0.170 | 2.0E-199 | -0.185 | 1.6E-04 | -0.100 | 1.4E-21 | - | - |
| rs12748152           | T/C | 0.037  | 1.0E-09  | -0.047 | 5.3E-01 | -      | -       | - | - |
| rs13238203           | T/C | -0.059 | 3.0E-06  | -      | -       | -0.240 | 3.7E-03 | - | - |
| rs1532085            | A/G | 0.031  | 2.0E-18  | -      | -       | 0.010  | 8.2E-02 | - | - |
| rs17145738           | T/C | -0.115 | 9.0E-99  | -      | -       | -0.070 | 7.2E-13 | - | - |
| rs174546             | T/C | 0.045  | 7.0E-38  | -      | -       | 0.030  | 2.7E-06 | - | - |
| rs1832007            | G/A | -0.033 | 2.0E-12  | -0.009 | 7.3E-01 | -      | -       | - | - |
| rs2068888            | A/G | -0.024 | 2.0E-11  | -0.033 | 1.5E-01 | -      | -       | - | - |
| rs2412710            | A/G | 0.099  | 2.0E-11  | 0.040  | 6.0E-01 | 0.020  | 1.0E-01 | - | - |
| rs2954029            | T/A | -0.076 | 1.0E-107 | -      | -       | -0.040 | 5.7E-13 | - | - |
| rs2972146            | G/T | -0.028 | 3.0E-15  | 0.024  | 4.3E-01 | -      | -       | - | - |
| rs3198697            | T/C | -0.020 | 2.0E-08  | 0.022  | 4.2E-01 | -      | -       | - | - |
| rs3764261            | A/C | -0.040 | 2.0E-25  | -      | -       | -0.020 | 7.3E-03 | - | - |
| rs38855              | G/A | -0.019 | 2.0E-08  | -0.007 | 7.5E-01 | -      | -       | - | - |
| rs442177             | G/T | -0.031 | 1.0E-18  | 0.000  | 1.0E+00 | -0.010 | 1.6E-02 | - | - |
| rs4846914            | G/A | 0.040  | 7.0E-31  | -      | -       | 0.020  | 1.4E-04 | - | - |
| rs6065906            | C/T | 0.053  | 2.0E-34  | -      | -       | 0.020  | 2.0E-02 | - | - |
| rs645040             | G/T | -0.029 | 2.0E-12  | -0.003 | 9.2E-01 | -      | -       | - | - |

SUPPLEMENTARY DATA

|            |     |        |          |        |         |        |         |        |         |
|------------|-----|--------|----------|--------|---------|--------|---------|--------|---------|
| rs6831256  | G/A | 0.026  | 2.0E-12  | -0.038 | 9.8E-02 | -      | -       | -      | -       |
| rs6882076  | T/C | -0.029 | 2.0E-15  | -0.040 | 1.5E-01 | -0.020 | 4.4E-05 | -      | -       |
| rs7248104  | A/G | -0.022 | 5.0E-10  | -0.042 | 5.9E-02 | -      | -       | -      | -       |
| rs731839   | G/A | 0.022  | 3.0E-09  | 0.022  | 3.3E-01 | -      | -       | -      | -       |
| rs8077889  | C/A | 0.025  | 1.0E-08  | 0.033  | 3.8E-01 | -      | -       | -      | -       |
| rs964184   | C/G | -0.234 | 7.0E-224 | -      | -       | -      | -       | -0.157 | 3.7E-33 |
| rs9686661  | T/C | 0.038  | 3.0E-16  | 0.019  | 4.7E-01 | 0.020  | 4.5E-03 | -      | -       |
| rs998584   | A/C | 0.029  | 3.0E-15  | 0.037  | 9.9E-02 | -      | -       | -      | -       |
| rs10761731 | T/A | -0.031 | 8.0E-12  | -      | -       | -      | -       | -      | -       |
| rs1121980  | A/G | -0.021 | 3.0E-08  | -      | -       | -      | -       | -      | -       |
| rs11649653 | G/C | -0.027 | 2.0E-07  | -      | -       | -      | -       | -      | -       |
| rs1495741  | G/A | 0.040  | 3.0E-12  | -      | -       | -      | -       | -      | -       |
| rs2131925  | G/T | -0.066 | 3.0E-74  | -      | -       | -      | -       | -      | -       |
| rs2929282  | T/A | 0.072  | 2.0E-09  | -      | -       | -      | -       | -      | -       |
| rs4765127  | T/G | -0.029 | 2.0E-08  | -      | -       | -      | -       | -      | -       |
| rs5756931  | C/T | -0.020 | 3.0E-08  | -      | -       | -      | -       | -      | -       |
| rs1936800  | C/T | -0.020 | 3.0E-08  | -      | -       | -      | -       | -      | -       |
| rs4722551  | C/T | 0.029  | 9E-11    | -      | -       | -      | -       | -      | -       |

Purple cells indicate effects in the same direction as the GLGC study.

Green cells indicate significant P-Values ( $P < 0.05$ )

EA = effect allele, RA = reference allele

SUPPLEMENTARY DATA

**Supplementary Table 9.** Comparison of results for lipid-associated SNPs in Caucasians identified by the Global Lipids Genetic Consortium (GLGC) to findings from genetic studies of lipid levels in African Americans.

| SNP        | Effect/Reference Allele | GLGC    |           | Zubair et al |         |
|------------|-------------------------|---------|-----------|--------------|---------|
|            |                         | $\beta$ | P Value   | $\beta$      | P Value |
| <b>HDL</b> |                         |         |           |              |         |
| rs11613352 | T/C                     | 0.028   | 2.00E-13  | 0.340        | 1.8E-01 |
| rs11869286 | G/C                     | -0.032  | 3.00E-17  | 0.760        | 1.8E-05 |
| rs12328675 | C/T                     | 0.045   | 2.00E-15  | -0.620       | 2.9E-03 |
| rs12678919 | G/A                     | 0.155   | 1.00E-149 | 1.070        | 9.5E-06 |
| rs1532085  | A/G                     | 0.107   | 1.00E-188 | 1.020        | 6.9E-10 |
| rs16942887 | A/G                     | 0.083   | 8.00E-54  | 1.250        | 2.3E-11 |
| rs17145738 | T/C                     | 0.041   | 5.00E-13  | 0.090        | 7.4E-01 |
| rs174546   | T/C                     | -0.039  | 8.00E-28  | -0.990       | 2.2E-04 |
| rs1800961  | T/C                     | -0.127  | 2.00E-34  | -1.990       | 4.2E-02 |
| rs1883025  | T/C                     | -0.07   | 2.00E-65  | -0.330       | 4.1E-02 |
| rs2652834  | A/G                     | -0.028  | 4.00E-11  | -0.290       | 1.1E-01 |
| rs2954029  | T/A                     | 0.04    | 3.00E-29  | 0.200        | 2.1E-01 |
| rs3136441  | C/T                     | 0.054   | 7.00E-29  | 0.460        | 3.3E-01 |
| rs3764261  | A/C                     | 0.241   | 1E-769    | 2.590        | 2.7E-57 |
| rs386000   | C/G                     | 0.048   | 3.00E-23  | -0.640       | 2.2E-03 |
| rs4148008  | G/C                     | -0.028  | 1.00E-12  | -0.380       | 2.0E-02 |
| rs4846914  | G/A                     | -0.048  | 4.00E-41  | -0.720       | 8.5E-04 |
| rs581080   | G/C                     | -0.042  | 1.00E-19  | 0.180        | 2.5E-01 |
| rs6065906  | C/T                     | -0.059  | 5.00E-40  | 0.940        | 5.6E-06 |
| rs838880   | C/T                     | 0.048   | 6.00E-32  | 0.010        | 9.4E-01 |
| rs10019888 | G/A                     | -0.027  | 5.00E-08  | -            | -       |
| rs1047891  | A/C                     | -0.027  | 9.00E-10  | -            | -       |
| rs1121980  | A/G                     | -0.02   | 7.00E-09  | -            | -       |
| rs11246602 | C/T                     | 0.034   | 2.00E-10  | -            | -       |
| rs12145743 | G/T                     | 0.02    | 2.00E-08  | -            | -       |
| rs12748152 | T/C                     | -0.051  | 1.00E-15  | -            | -       |
| rs12801636 | A/G                     | 0.024   | 3.00E-08  | -            | -       |
| rs12967135 | A/G                     | -0.026  | 4E-08     | -            | -       |
| rs13107325 | T/C                     | -0.071  | 1.00E-15  | -            | -       |
| rs13326165 | A/G                     | 0.029   | 9.00E-11  | -            | -       |
| rs1689800  | G/A                     | -0.034  | 5.00E-20  | -            | -       |
| rs17173637 | C/T                     | -0.036  | 2.00E-08  | -            | -       |
| rs17695224 | A/G                     | -0.029  | 2.00E-13  | -            | -       |
| rs181362   | T/C                     | -0.038  | 4.00E-18  | -            | -       |
| rs1936800  | C/T                     | 0.02    | 3.00E-10  | -            | -       |
| rs2013208  | T/C                     | 0.025   | 9.00E-12  | -            | -       |
| rs2290547  | A/G                     | -0.030  | 4.00E-09  | -            | -       |
| rs2293889  | T/G                     | -0.031  | 4.00E-17  | -            | -       |
| rs2602836  | A/G                     | 0.019   | 5.00E-08  | -            | -       |
| rs2606736  | C/T                     | 0.025   | 5.00E-08  | -            | -       |
| rs2923084  | G/A                     | -0.026  | 5E-08     | -            | -       |
| rs2925979  | T/C                     | -0.035  | 1.00E-19  | -            | -       |
| rs2972146  | G/T                     | 0.032   | 2.00E-17  | -            | -       |
| rs3822072  | A/G                     | -0.025  | 4.00E-12  | -            | -       |
| rs4129767  | G/A                     | -0.024  | 2.00E-11  | -            | -       |
| rs4142995  | T/G                     | -0.026  | 9.00E-12  | -            | -       |
| rs4420638  | G/A                     | -0.067  | 2.00E-21  | -            | -       |
| rs4650994  | G/A                     | 0.021   | 7.00E-09  | -            | -       |
| rs4660293  | G/A                     | -0.035  | 3.00E-18  | -            | -       |
| rs4731702  | T/C                     | 0.029   | 5.00E-17  | -            | -       |

SUPPLEMENTARY DATA

|            |     |        |           |        |         |
|------------|-----|--------|-----------|--------|---------|
| rs4759375  | T/C | 0.056  | 3E-08     | -      | -       |
| rs4765127  | T/G | 0.032  | 8.00E-10  | -      | -       |
| rs4917014  | G/T | 0.022  | 1.00E-08  | -      | -       |
| rs4983559  | G/A | 0.02   | 1.00E-08  | -      | -       |
| rs499974   | A/C | -0.026 | 1.00E-08  | -      | -       |
| rs605066   | C/T | -0.028 | 3E-08     | -      | -       |
| rs6450176  | A/G | -0.025 | 7.00E-10  | -      | -       |
| rs6805251  | T/C | 0.02   | 1.00E-08  | -      | -       |
| rs702485   | G/A | 0.024  | 7.00E-12  | -      | -       |
| rs7134375  | A/C | 0.021  | 1E-08     | -      | -       |
| rs7134594  | C/T | -0.035 | 2.00E-13  | -      | -       |
| rs7241918  | G/T | -0.09  | 1.00E-44  | -      | -       |
| rs7255436  | C/A | -0.032 | 2E-08     | -      | -       |
| rs731839   | G/A | -0.022 | 3.00E-09  | -      | -       |
| rs737337   | C/T | -0.056 | 5.00E-17  | -      | -       |
| rs7941030  | C/T | 0.027  | 1.00E-14  | -      | -       |
| rs964184   | C/G | 0.106  | 6.00E-48  | -      | -       |
| rs970548   | C/A | 0.026  | 2.00E-10  | -      | -       |
| rs998584   | A/C | -0.026 | 2.00E-11  | -      | -       |
| rs9987289  | A/G | -0.082 | 2.00E-41  | -      | -       |
| rs17404153 | T/G | 0.028  | 5.00E-09  | -      | -       |
| <b>LDL</b> |     |        |           |        |         |
| rs11220462 | A/G | 0.059  | 7.00E-21  | 0.090  | 9.7E-01 |
| rs12027135 | A/T | -0.03  | 2.00E-14  | 0.060  | 8.9E-01 |
| rs12916    | C/T | 0.073  | 8.00E-78  | 1.960  | 2.5E-05 |
| rs1367117  | A/G | 0.119  | 1.00E-182 | 4.360  | 8.2E-12 |
| rs174546   | T/C | -0.051 | 2.00E-39  | -2.170 | 2.8E-03 |
| rs2000999  | A/G | 0.065  | 4.00E-41  | 1.910  | 1.3E-01 |
| rs2479409  | G/A | 0.064  | 3.00E-50  | 0.980  | 3.6E-02 |
| rs2902940  | G/A | -0.027 | 2.00E-11  | 0.210  | 6.1E-01 |
| rs2954029  | T/A | -0.056 | 2.00E-50  | 0.000  | 1.0E+00 |
| rs3757354  | T/C | -0.038 | 2.00E-17  | -1.110 | 1.1E-02 |
| rs3764261  | A/C | -0.053 | 2.00E-34  | -0.880 | 4.6E-02 |
| rs4299376  | G/T | 0.081  | 4.00E-72  | -2.200 | 2.9E-01 |
| rs6511720  | T/G | -0.221 | 4.00E-262 | -8.080 | 3.7E-38 |
| rs9987289  | A/G | -0.071 | 9.00E-24  | -1.880 | 1.4E-03 |
| rs10102164 | A/G | 0.032  | 4E-11     | -      | -       |
| rs10401969 | C/T | -0.118 | 3.00E-54  | -      | -       |
| rs10490626 | A/G | -0.015 | 2.00E-12  | -      | -       |
| rs11065987 | G/A | -0.027 | 1.00E-11  | -      | -       |
| rs11136341 | G/A | 0.045  | 7.00E-12  | -      | -       |
| rs11563251 | T/C | 0.034  | 5E-8      | -      | -       |
| rs1169288  | C/A | 0.038  | 6.00E-21  | -      | -       |
| rs1250229  | T/C | -0.024 | 3E-8      | -      | -       |
| rs12670798 | C/T | 0.034  | 5.00E-14  | -      | -       |
| rs12748152 | T/C | 0.05   | 3.00E-12  | -      | -       |
| rs1564348  | C/T | 0.048  | 3.00E-21  | -      | -       |
| rs17404153 | T/G | -0.034 | 2.00E-09  | -      | -       |
| rs1800562  | A/G | -0.062 | 8.00E-14  | -      | -       |
| rs1801689  | C/A | 0.103  | 1E-11     | -      | -       |
| rs2030746  | T/C | 0.021  | 9.00E-09  | -      | -       |
| rs2072183  | C/G | 0.039  | 7.00E-16  | -      | -       |
| rs2081687  | T/C | 0.031  | 1.00E-07  | -      | -       |
| rs2131925  | G/T | -0.049 | 3.00E-32  | -      | -       |
| rs2255141  | A/G | 0.03   | 1.00E-13  | -      | -       |
| rs2328223  | C/A | 0.03   | 6E-9      | -      | -       |
| rs2642442  | C/T | -0.036 | 5.00E-11  | -      | -       |
| rs267733   | G/A | -0.033 | 5E-9      | -      | -       |
| rs2710642  | G/A | -0.024 | 6E-9      | -      | -       |

SUPPLEMENTARY DATA

|                          |     |        |           |   |   |
|--------------------------|-----|--------|-----------|---|---|
| rs314253                 | C/T | -0.024 | 3.00E-10  | - | - |
| rs3177928                | A/G | 0.045  | 3.00E-17  | - | - |
| rs364585                 | A/G | -0.025 | 4E-10     | - | - |
| rs3780181                | G/A | -0.044 | 2E-9      | - | - |
| rs4253772                | T/C | -0.031 | 3.00E-08  | - | - |
| rs4420638                | G/A | 0.225  | 2.00E-178 | - | - |
| rs4530754                | G/A | -0.028 | 4.00E-12  | - | - |
| rs4722551                | C/T | 0.039  | 4E-14     | - | - |
| rs4942486                | T/C | 0.024  | 2E-11     | - | - |
| rs514230                 | A/T | -0.036 | 9.00E-12  | - | - |
| rs5763662                | T/C | 0.077  | 1E-8      | - | - |
| rs6029526                | A/T | 0.044  | 5.00E-18  | - | - |
| rs629301                 | G/T | -0.167 | 5.00E-241 | - | - |
| rs6882076                | T/C | -0.046 | 3.00E-31  | - | - |
| rs7206971                | A/G | 0.029  | 3.00E-07  | - | - |
| rs7640978                | T/C | -0.039 | 1E-8      | - | - |
| rs8017377                | A/G | 0.03   | 3.00E-15  | - | - |
| rs9411489                | T/C | 0.077  | 2.00E-41  | - | - |
| rs9488822                | T/A | 0.031  | 2.00E-07  | - | - |
| rs964184                 | C/G | -0.086 | 2.00E-26  | - | - |
| rs6831256                | G/A | -0.025 | 2.00E-08  | - | - |
| <b>Total Cholesterol</b> |     |        |           |   |   |
| rs10102164               | A/G | 0.03   | 5.00E-11  | - | - |
| rs10128711               | T/C | -0.031 | 1.00E-11  | - | - |
| rs10401969               | C/T | -0.137 | 4.00E-77  | - | - |
| rs1077514                | C/T | -0.03  | 6E-9      | - | - |
| rs10904908               | G/A | 0.025  | 3E-11     | - | - |
| rs11065987               | G/A | -0.031 | 2.00E-16  | - | - |
| rs11136341               | G/A | 0.038  | 6.00E-09  | - | - |
| rs11220462               | A/G | 0.047  | 6.00E-15  | - | - |
| rs11563251               | T/C | 0.037  | 1E-9      | - | - |
| rs11603023               | T/C | 0.022  | 1E-8      | - | - |
| rs1169288                | C/A | 0.032  | 4.00E-17  | - | - |
| rs11694172               | G/A | 0.028  | 2E-9      | - | - |
| rs12027135               | A/T | -0.027 | 5.00E-12  | - | - |
| rs1260326                | T/C | 0.051  | 3.00E-42  | - | - |
| rs12670798               | C/T | 0.036  | 1.00E-16  | - | - |
| rs12916                  | C/T | 0.068  | 5.00E-74  | - | - |
| rs13315871               | A/G | -0.036 | 4E-8      | - | - |
| rs1367117                | A/G | 0.1    | 3.00E-139 | - | - |
| rs138777                 | A/G | 0.021  | 5E-8      | - | - |
| rs1495741                | G/A | 0.032  | 3.00E-08  | - | - |
| rs1532085                | A/G | 0.054  | 7.00E-47  | - | - |
| rs1564348                | C/T | 0.049  | 3.00E-23  | - | - |
| rs174546                 | T/C | -0.048 | 3.00E-37  | - | - |
| rs1800562                | A/G | -0.056 | 2.00E-12  | - | - |
| rs1800961                | T/C | -0.106 | 1.00E-24  | - | - |
| rs1883025                | T/C | -0.067 | 6.00E-53  | - | - |
| rs1997243                | G/A | 0.033  | 3E-10     | - | - |
| rs2000999                | A/G | 0.062  | 7.00E-41  | - | - |
| rs2030746                | T/C | 0.02   | 4.00E-08  | - | - |
| rs2072183                | C/G | 0.036  | 4.00E-15  | - | - |
| rs2081687                | T/C | 0.038  | 9.00E-12  | - | - |
| rs2131925                | G/T | -0.075 | 4.00E-80  | - | - |
| rs2255141                | A/G | 0.031  | 7.00E-16  | - | - |
| rs2277862                | T/C | -0.035 | 5.00E-11  | - | - |
| rs2287623                | G/A | 0.027  | 4E-12     | - | - |
| rs2290159                | C/G | -0.037 | 2.00E-09  | - | - |
| rs2479409                | G/A | 0.054  | 2.00E-39  | - | - |



SUPPLEMENTARY DATA

|                      |     |        |           |        |         |
|----------------------|-----|--------|-----------|--------|---------|
| rs2642442            | C/T | -0.035 | 3.00E-11  | -      | -       |
| rs2758886            | A/G | 0.023  | 3E-8      | -      | -       |
| rs2814982            | T/C | -0.044 | 4.00E-15  | -      | -       |
| rs2902940            | G/A | -0.024 | 9E-10/    | -      | -       |
| rs2954029            | T/A | -0.062 | 2.00E-65  | -      | -       |
| rs314253             | C/T | -0.023 | 3E-10     | -      | -       |
| rs3177928            | A/G | 0.048  | 1.00E-21  | -      | -       |
| rs3757354            | T/C | -0.035 | 2.00E-15  | -      | -       |
| rs3764261            | A/C | 0.05   | 4.00E-31  | -      | -       |
| rs3780181            | G/A | -0.044 | 7E-10     | -      | -       |
| rs4253772            | T/C | 0.032  | 1.00E-08  | -      | -       |
| rs4299376            | G/T | 0.079  | 3.00E-73  | -      | -       |
| rs4420638            | G/A | 0.197  | 1.00E-149 | -      | -       |
| rs4530754            | G/A | -0.023 | 2.00E-09  | -      | -       |
| rs4722551            | C/T | 0.023  | 7.0E-9    | -      | -       |
| rs4883201            | G/A | -0.035 | 2E-9      | -      | -       |
| rs492602             | G/A | 0.031  | 1.00E-16  | -      | -       |
| rs514230             | A/T | -0.039 | 5.00E-14  | -      | -       |
| rs581080             | G/C | -0.038 | 1.00E-13  | -      | -       |
| rs6029526            | A/T | 0.04   | 1.00E-16  | -      | -       |
| rs629301             | G/T | -0.134 | 2.00E-170 | -      | -       |
| rs6511720            | T/G | -0.185 | 5.00E-202 | -      | -       |
| rs6882076            | T/C | -0.051 | 5.00E-41  | -      | -       |
| rs7206971            | A/G | 0.03   | 1.00E-07  | -      | -       |
| rs7241918            | G/T | -0.058 | 4.00E-18  | -      | -       |
| rs7515577            | C/A | -0.037 | 2.00E-08  | -      | -       |
| rs7570971            | A/C | 0.03   | 1.00E-13  | -      | -       |
| rs7640978            | T/C | -0.038 | 1E-8      | -      | -       |
| rs7941030            | C/T | 0.028  | 2.00E-14  | -      | -       |
| rs9376090            | T/C | -0.025 | 3E-9      | -      | -       |
| rs9411489            | T/C | 0.069  | 3.00E-35  | -      | -       |
| rs9488822            | T/A | 0.034  | 1.00E-09  | -      | -       |
| rs964184             | C/G | -0.121 | 3.00E-55  | -      | -       |
| rs970548             | C/A | -0.026 | 8.00E-09  | -      | -       |
| rs9987289            | A/G | -0.084 | 2.00E-36  | -      | -       |
| rs10490626           | A/G | 0.042  | 6.00E-09  | -      | -       |
| rs6831256            | G/A | -0.022 | 1.00E-10  | -      | -       |
| <b>Triglycerides</b> |     |        |           |        |         |
| rs10401969           | C/T | -0.121 | 1.00E-69  | 0.000  | 7.8E-01 |
| rs11613352           | T/C | -0.028 | 9.00E-14  | -0.010 | 4.1E-01 |
| rs11776767           | C/G | 0.022  | 3.00E-11  | 0.000  | 6.2E-01 |
| rs1260326            | T/C | 0.115  | 2.00E-239 | 0.050  | 2.3E-15 |
| rs12678919           | G/A | -0.17  | 2.00E-199 | -0.030 | 2.0E-05 |
| rs13238203           | T/C | -0.059 | 0.000003  | -0.070 | 5.7E-01 |
| rs1532085            | A/G | 0.031  | 2.00E-18  | 0.010  | 5.5E-03 |
| rs17145738           | T/C | -0.115 | 9.00E-99  | -0.040 | 6.0E-07 |
| rs174546             | T/C | 0.045  | 7.00E-38  | 0.030  | 2.9E-04 |
| rs2412710            | A/G | 0.099  | 2.00E-11  | 0.010  | 4.9E-01 |
| rs2954029            | T/A | -0.076 | 1.00E-107 | 0.000  | 5.8E-01 |
| rs3764261            | A/C | -0.04  | 2.00E-25  | -0.010 | 2.0E-02 |
| rs442177             | G/T | -0.031 | 1.00E-18  | -0.010 | 6.7E-02 |
| rs4846914            | G/A | 0.04   | 7.00E-31  | 0.010  | 7.2E-02 |
| rs6065906            | C/T | 0.053  | 2.00E-34  | 0.020  | 2.6E-04 |
| rs6882076            | T/C | -0.029 | 2.00E-15  | -0.020 | 4.8E-04 |
| rs9686661            | T/C | 0.038  | 3.00E-16  | 0.030  | 2.8E-06 |
| rs10761731           | T/A | -0.031 | 8.00E-12  | -      | -       |
| rs1121980            | A/G | -0.021 | 3.00E-08  | -      | -       |
| rs11649653           | G/C | -0.027 | 2.00E-07  | -      | -       |
| rs12748152           | T/C | 0.037  | 1.00E-09  | -      | -       |

## SUPPLEMENTARY DATA

|           |     |        |           |   |   |
|-----------|-----|--------|-----------|---|---|
| rs1495741 | G/A | 0.04   | 3.00E-12  | - | - |
| rs1832007 | G/A | -0.033 | 2E-12     | - | - |
| rs2068888 | A/G | -0.024 | 2.00E-11  | - | - |
| rs2131925 | G/T | -0.066 | 3.00E-74  | - | - |
| rs2929282 | T/A | 0.072  | 2.00E-09  | - | - |
| rs2972146 | G/T | -0.028 | 3.00E-15  | - | - |
| rs3198697 | T/C | -0.020 | 2E-8      | - | - |
| rs38855   | G/A | -0.019 | 2E-8      | - | - |
| rs4765127 | T/G | -0.029 | 2.00E-08  | - | - |
| rs5756931 | C/T | -0.02  | 3.00E-08  | - | - |
| rs645040  | G/T | -0.029 | 2.00E-12  | - | - |
| rs6831256 | G/A | 0.026  | 2.00E-12  | - | - |
| rs7248104 | A/G | -0.022 | 5E-10     | - | - |
| rs731839  | G/A | 0.022  | 3.00E-09  | - | - |
| rs8077889 | C/A | 0.025  | 1E-8      | - | - |
| rs964184  | C/G | -0.234 | 7.00E-224 | - | - |
| rs998584  | A/C | -0.026 | 3.00E-15  | - | - |
| rs1936800 | C/T | -0.02  | 3.00E-08  | - | - |
| rs4722551 | C/T | 0.029  | 9E-11     | - | - |

Purple cells indicate effects in the same direction as the GLGC study.

Green cells indicate significant P-Values ( $P < 0.05$ )

SUPPLEMENTARY DATA

**Supplementary Table 10.** Comparison of results for lipid-associated SNPs in Caucasians identified by the Global Lipids Genetic Consortium (GLGC) to findings from genetic studies of lipid levels in Asians.

| SNP        | EA/RA | GLGC    |          | AGEN    |         | Zubair et al |         | Braun et al |         |
|------------|-------|---------|----------|---------|---------|--------------|---------|-------------|---------|
|            |       | $\beta$ | P Value  | $\beta$ | P Value | $\beta$      | P Value | $\beta$     | P Value |
| <b>HDL</b> |       |         |          |         |         |              |         |             |         |
| rs1121980  | A/G   | -0.020  | 7.0E-09  | 0.001   | 9.6E-01 | -            | -       | -           | -       |
| rs11246602 | C/T   | 0.034   | 2.0E-10  | -0.002  | 8.8E-01 | -            | -       | -           | -       |
| rs11613352 | T/C   | 0.028   | 2.0E-13  | 0.039   | 8.5E-02 | -0.600       | 4.8E-03 | -           | -       |
| rs11869286 | G/C   | -0.032  | 3.0E-17  | -0.027  | 4.8E-04 | 0.250        | 2.4E-01 | -           | -       |
| rs12145743 | G/T   | 0.020   | 2.0E-08  | 0.015   | 2.3E-01 | -            | -       | -           | -       |
| rs12328675 | C/T   | 0.045   | 2.0E-15  | -       | -       | 1.840        | 4.7E-01 | -           | -       |
| rs12678919 | G/A   | 0.155   | 1.0E-149 | 0.163   | 9.6E-37 | 2.000        | 1.9E-09 | -           | -       |
| rs12748152 | T/C   | -0.051  | 1.0E-15  | -0.116  | 4.5E-02 | -            | -       | -           | -       |
| rs12801636 | A/G   | 0.024   | 3.0E-08  | 0.030   | 8.7E-04 | -            | -       | -           | -       |
| rs12967135 | A/G   | -0.026  | 4.0E-08  | -0.017  | 8.4E-02 | -            | -       | -           | -       |
| rs13326165 | A/G   | 0.029   | 9.0E-11  | 0.075   | 1.8E-01 | -            | -       | -           | -       |
| rs1532085  | A/G   | 0.107   | 1.0E-188 | -       | -       | -1.330       | 2.0E-08 | -           | -       |
| rs1689800  | G/A   | -0.034  | 5.0E-20  | -0.026  | 3.5E-03 | -            | -       | -           | -       |
| rs16942887 | A/G   | 0.083   | 8.0E-54  | 0.160   | 1.4E-02 | 1.140        | 9.7E-02 | -           | -       |
| rs17145738 | T/C   | 0.041   | 5.0E-13  | 0.022   | 7.8E-02 | 0.200        | 5.7E-01 | -           | -       |
| rs17173637 | C/T   | -0.036  | 2.0E-08  | -0.052  | 3.3E-01 | -            | -       | -           | -       |
| rs174546   | T/C   | -0.039  | 8.0E-28  | -0.033  | 3.0E-04 | -0.600       | 4.8E-03 | -           | -       |
| rs17695224 | A/G   | -0.029  | 2.0E-13  | -0.036  | 1.3E-04 | -            | -       | -           | -       |
| rs1800961  | T/C   | -0.127  | 2.0E-34  | -       | -       | 0.190        | 8.2E-01 | -           | -       |
| rs1883025  | T/C   | -0.070  | 2.0E-65  | -       | -       | -1.330       | 2.0E-08 | -           | -       |
| rs1936800  | C/T   | 0.020   | 3.0E-10  | 0.007   | 3.8E-01 | -            | -       | -           | -       |
| rs2013208  | T/C   | 0.025   | 9.0E-12  | 0.025   | 1.7E-02 | -            | -       | -           | -       |
| rs2290547  | A/G   | -0.030  | 4.0E-09  | -0.009  | 4.8E-01 | -            | -       | -           | -       |
| rs2293889  | T/G   | -0.031  | 4.0E-17  | -0.038  | 3.2E-04 | -            | -       | -           | -       |
| rs2602836  | A/G   | 0.019   | 5.0E-08  | 0.000   | 9.9E-01 | -            | -       | -           | -       |
| rs2606736  | C/T   | 0.025   | 5.0E-08  | -0.010  | 2.7E-01 | -            | -       | -           | -       |
| rs2652834  | A/G   | -0.028  | 4.0E-11  | -       | -       | 0.021        | 8.2E-01 | -           | -       |
| rs2923084  | G/A   | -0.026  | 5.0E-08  | 0.009   | 3.1E-01 | -            | -       | -           | -       |
| rs2925979  | T/C   | -0.035  | 1.0E-19  | -0.036  | 1.7E-04 | -            | -       | -           | -       |
| rs2954029  | T/A   | 0.040   | 3.0E-29  | 0.006   | 4.1E-01 | 0.170        | 4.2E-01 | -           | -       |
| rs2972146  | G/T   | 0.032   | 2.0E-17  | 0.023   | 8.4E-02 | -            | -       | -           | -       |
| rs3136441  | C/T   | 0.054   | 7.0E-29  | 0.023   | 5.7E-03 | 0.220        | 2.8E-01 | -           | -       |
| rs3764261  | A/C   | 0.241   | 1E-729   | 0.262   | 1.7E-74 | 3.390        | 1.0E-35 | 0.160       | 2.0E-26 |
| rs3822072  | A/G   | -0.025  | 4.0E-12  | -0.005  | 5.2E-01 | -            | -       | -           | -       |
| rs386000   | C/G   | 0.048   | 3.0E-23  | 0.029   | 5.3E-02 | 0.440        | 6.7E-01 | -           | -       |
| rs4129767  | G/A   | -0.024  | 2.0E-11  | -0.029  | 5.2E-04 | -            | -       | -           | -       |
| rs4142995  | T/G   | -0.026  | 9.0E-12  | -0.042  | 6.4E-08 | -            | -       | -           | -       |
| rs4148008  | G/C   | -0.028  | 1.0E-12  | -0.029  | 4.4E-04 | -0.180       | 4.1E-01 | -           | -       |
| rs4420638  | G/A   | -0.067  | 2.0E-21  | -0.110  | 1.0E-16 | -            | -       | -           | -       |
| rs4650994  | G/A   | 0.021   | 7.0E-09  | 0.015   | 4.7E-02 | -            | -       | -           | -       |
| rs4660293  | G/A   | -0.035  | 3.0E-18  | -0.036  | 3.3E-03 | -            | -       | -           | -       |
| rs4731702  | T/C   | 0.029   | 5.0E-17  | 0.022   | 1.1E-02 | -            | -       | -           | -       |
| rs4765127  | T/G   | 0.032   | 8.0E-10  | -0.011  | 4.3E-01 | -            | -       | -           | -       |
| rs4846914  | G/A   | -0.048  | 4.0E-41  | -       | -       | -0.650       | 7.2E-03 | -           | -       |
| rs4917014  | G/T   | 0.022   | 1.0E-08  | 0.028   | 5.8E-04 | -            | -       | -           | -       |
| rs4983559  | G/A   | 0.020   | 1.0E-08  | 0.010   | 4.7E-01 | -            | -       | -           | -       |
| rs499974   | A/C   | -0.026  | 1.0E-08  | -0.032  | 3.7E-04 | -            | -       | -           | -       |
| rs581080   | G/C   | -0.042  | 1.0E-19  | -0.003  | 8.5E-01 | 0.210        | 5.4E-01 | -           | -       |
| rs605066   | C/T   | -0.028  | 3.0E-08  | -0.015  | 7.2E-02 | -            | -       | -           | -       |
| rs6065906  | C/T   | -0.059  | 5.0E-40  | 0.060   | 2.7E-01 | 0.180        | 7.8E-01 | -           | -       |
| rs6450176  | A/G   | -0.025  | 7.0E-10  | -0.010  | 1.8E-01 | -            | -       | -           | -       |

SUPPLEMENTARY DATA

|            |     |        |            |        |         |        |         |   |   |
|------------|-----|--------|------------|--------|---------|--------|---------|---|---|
| rs6805251  | T/C | 0.020  | 1.0E-08    | 0.007  | 3.7E-01 | -      | -       | - | - |
| rs702485   | G/A | 0.024  | 7.0E-12    | 0.052  | 5.1E-05 | -      | -       | - | - |
| rs7134375  | A/C | 0.021  | 1.0E-08    | 0.020  | 8.5E-02 | -      | -       | - | - |
| rs7134594  | C/T | -0.035 | 2.0E-13    | -0.037 | 2.2E-05 | -      | -       | - | - |
| rs7241918  | G/T | -0.090 | 1.0E-44    | -0.043 | 3.8E-04 | -      | -       | - | - |
| rs7255436  | C/A | -0.032 | 2.0E-08    | -0.005 | 7.8E-01 | -      | -       | - | - |
| rs731839   | G/A | -0.022 | 3.0E-09    | -0.001 | 8.9E-01 | -      | -       | - | - |
| rs737337   | C/T | -0.056 | 5.0E-17    | -0.058 | 5.5E-08 | -      | -       | - | - |
| rs838880   | C/T | 0.048  | 6.0E-32    | 0.047  | 3.3E-05 | 0.820  | 5.4E-05 | - | - |
| rs970548   | C/A | 0.026  | 2.0E-10    | -0.001 | 9.4E-01 | -      | -       | - | - |
| rs998584   | A/C | -0.026 | 2.0E-11    | -0.020 | 3.1E-02 | -      | -       | - | - |
| rs9987289  | A/G | -0.082 | 2.0E-41    | 0.123  | 9.3E-02 | -1.580 | 8.1E-02 | - | - |
| rs17404153 | T/G | 0.028  | 5.0E-09    | 0.004  | 7.5E-01 | -      | -       | - | - |
| rs10019888 | G/A | -0.027 | 5.0E-08    | -      | -       | -      | -       | - | - |
| rs1047891  | A/C | -0.027 | 9.0E-10    | -      | -       | -      | -       | - | - |
| rs13107325 | T/C | -0.071 | 1.0E-15    | -      | -       | -      | -       | - | - |
| rs181362   | T/C | -0.038 | 4.0E-18    | -      | -       | -      | -       | - | - |
| rs4759375  | T/C | 0.056  | 3.0E-08    | -      | -       | -      | -       | - | - |
| rs7941030  | C/T | 0.027  | 1.0E-14    | -      | -       | -      | -       | - | - |
| rs964184   | C/G | 0.106  | 6.0E-48    | -      | -       | -      | -       | - | - |
| <b>LDL</b> |     |        |            |        |         |        |         |   |   |
| rs10102164 | A/G | 0.032  | 4.0E-11    | 0.012  | 2.0E-01 | -      | -       | - | - |
| rs10401969 | C/T | -0.118 | 3.0E-54    | -0.033 | 3.4E-02 | -0.860 | 4.0E-01 | - | - |
| rs11136341 | G/A | 0.045  | 7.0E-12    | 0.033  | 3.3E-02 | -      | -       | - | - |
| rs11220462 | A/G | 0.059  | 7.0E-21    | 0.024  | 5.2E-03 | 0.870  | 2.3E-01 | - | - |
| rs11563251 | T/C | 0.034  | 5.0E-08    | 0.022  | 3.2E-01 | -      | -       | - | - |
| rs1169288  | C/A | 0.032  | 4.0E-17    | 0.032  | 3.1E-03 | -      | -       | - | - |
| rs12027135 | A/T | -0.030 | 2.0E-14    | -0.028 | 2.3E-03 | 1.460  | 3.3E-02 | - | - |
| rs1250229  | T/C | -0.024 | 3.0E-08    | -0.035 | 1.3E-02 | -      | -       | - | - |
| rs12670798 | C/T | 0.034  | 5.0E-14    | 0.001  | 9.2E-01 | -      | -       | - | - |
| rs12748152 | T/C | 0.050  | 3.0E-12    | 0.059  | 3.1E-01 | -      | -       | - | - |
| rs12916    | C/T | 0.073  | 8.0E-78    | 0.077  | 1.0E-21 | 2.810  | 4.4E-06 | - | - |
| rs1367117  | A/G | 0.119  | 1.0E-182   | 0.078  | 4.1E-07 | 3.240  | 3.1E-04 | - | - |
| rs17404153 | T/G | -0.034 | 2.0E-09    | -0.017 | 1.6E-01 | -      | -       | - | - |
| rs174546   | T/C | -0.051 | 2.0E-39    | -0.048 | 3.9E-07 | -1.350 | 3.2E-02 | - | - |
| rs2000999  | A/G | 0.065  | 4.0E-41    | 0.052  | 1.7E-06 | 2.860  | 9.6E-05 | - | - |
| rs2030746  | T/C | 0.021  | 9.0E-09    | 0.013  | 2.3E-01 | -      | -       | - | - |
| rs2072183  | C/G | 0.039  | 7.0E-16    | 0.001  | 9.7E-01 | -      | -       | - | - |
| rs2081687  | T/C | 0.031  | 1.0E-07    | 0.025  | 1.8E-02 | -      | -       | - | - |
| rs2131925  | G/T | -0.049 | 3.0E-32    | -0.015 | 1.2E-01 | -      | -       | - | - |
| rs2255141  | A/G | 0.030  | 1.0E-13    | 0.027  | 3.6E-03 | -      | -       | - | - |
| rs2328223  | C/A | 0.030  | 6.0E-09    | 0.038  | 6.2E-03 | -      | -       | - | - |
| rs2479409  | G/A | 0.064  | 3.0E-50    | -0.001 | 9.1E-01 | 0.000  | 1.0E+00 | - | - |
| rs2642442  | C/T | -0.036 | 5.0E-11    | -0.047 | 3.3E-04 | -      | -       | - | - |
| rs267733   | G/A | -0.033 | 5.0E-09    | 0.018  | 5.4E-01 | -      | -       | - | - |
| rs2710642  | G/A | -0.024 | 6.0E-09    | -0.024 | 7.7E-03 | -      | -       | - | - |
| rs2902940  | G/A | -0.027 | 2.0E-11    | 0.006  | 5.4E-01 | 0.560  | 4.0E-01 | - | - |
| rs2954029  | T/A | -0.056 | 2.0E-50    | -0.047 | 1.1E-08 | -0.840 | 1.7E-01 | - | - |
| rs314253   | C/T | -0.024 | 3.0E-10    | -0.012 | 2.1E-01 | -      | -       | - | - |
| rs3177928  | A/G | 0.045  | 3.0E-17    | 0.029  | 2.0E-01 | -      | -       | - | - |
| rs364585   | A/G | -0.025 | 4.0E-10    | -0.020 | 1.8E-02 | -      | -       | - | - |
| rs3757354  | T/C | -0.038 | 2.0E-17    | 0.000  | 9.7E-01 | 0.600  | 3.5E-01 | - | - |
| rs3764261  | A/C | -0.053 | 2.0E-34    | -0.003 | 8.2E-01 | 1.070  | 1.9E-01 | - | - |
| rs3780181  | G/A | -0.044 | 7E-10/2E-9 | -0.024 | 7.9E-02 | -      | -       | - | - |
| rs4299376  | G/T | 0.081  | 4.0E-72    | -      | -       | 7.880  | 8.7E-02 | - | - |
| rs4420638  | G/A | 0.225  | 2.0E-178   | 0.127  | 1.9E-19 | -      | -       | - | - |
| rs4530754  | G/A | -0.028 | 4.0E-12    | -0.014 | 1.0E-01 | -      | -       | - | - |
| rs4942486  | T/C | 0.024  | 2.0E-11    | 0.031  | 1.8E-04 | -      | -       | - | - |
| rs514230   | A/T | -0.036 | 9.0E-12    | 0.018  | 1.3E-01 | -      | -       | - | - |

SUPPLEMENTARY DATA

|                          |     |        |          |        |         |        |         |   |   |
|--------------------------|-----|--------|----------|--------|---------|--------|---------|---|---|
| rs5763662                | T/C | 0.077  | 1.0E-08  | 0.027  | 5.9E-02 | -      | -       | - | - |
| rs629301                 | G/T | -0.167 | 5.0E-241 | -0.197 | 4.2E-24 | -      | -       | - | - |
| rs6511720                | T/G | -0.221 | 4.0E-262 | -      | -       | -3.110 | 3.0E-01 | - | - |
| rs6882076                | T/C | -0.046 | 3.0E-31  | -0.035 | 1.2E-04 | -1.870 | 6.3E-03 | - | - |
| rs8017377                | A/G | 0.030  | 3.0E-15  | 0.015  | 5.6E-01 | -      | -       | - | - |
| rs964184                 | C/G | -0.086 | 2.0E-26  | 0.007  | 4.9E-01 | -      | -       | - | - |
| rs9987289                | A/G | -0.071 | 9.0E-24  | 0.064  | 3.8E-01 | -2.810 | 2.9E-01 | - | - |
| rs6831256                | G/A | -0.025 | 2.0E-08  | 0.012  | 2.6E-01 | -      | -       | - | - |
| rs10490626               | A/G | -0.015 | 2.0E-12  | -      | -       | -      | -       | - | - |
| rs11065987               | G/A | -0.027 | 1.0E-11  | -      | -       | -      | -       | - | - |
| rs1564348                | C/T | 0.048  | 3.0E-21  | -      | -       | -      | -       | - | - |
| rs1800562                | A/G | -0.062 | 8.0E-14  | -      | -       | -      | -       | - | - |
| rs1801689                | C/A | 0.103  | 1E-11    | -      | -       | -      | -       | - | - |
| rs4253772                | T/C | -0.031 | 3.0E-08  | -      | -       | -      | -       | - | - |
| rs4722551                | C/T | 0.039  | 4E-14    | -      | -       | -      | -       | - | - |
| rs6029526                | A/T | 0.044  | 5.0E-18  | -      | -       | -      | -       | - | - |
| rs7206971                | A/G | 0.029  | 3.0E-07  | -      | -       | -      | -       | - | - |
| rs7640978                | T/C | -0.039 | 1E-8     | -      | -       | -      | -       | - | - |
| rs9411489                | T/C | 0.077  | 2.0E-41  | -      | -       | -      | -       | - | - |
| rs9488822                | T/A | 0.031  | 2.0E-07  | -      | -       | -      | -       | - | - |
| <b>Total Cholesterol</b> |     |        |          |        |         |        |         |   |   |
| rs10102164               | A/G | 0.030  | 5.0E-11  | 0.004  | 6.5E-01 | -      | -       | - | - |
| rs10128711               | T/C | -0.031 | 1.0E-11  | -0.005 | 5.2E-01 | -      | -       | - | - |
| rs10401969               | C/T | -0.137 | 4.0E-77  | -0.053 | 5.3E-04 | -      | -       | - | - |
| rs1077514                | C/T | -0.030 | 6.0E-09  | 0.001  | 9.3E-01 | -      | -       | - | - |
| rs10904908               | G/A | 0.025  | 3.0E-11  | 0.011  | 2.2E-01 | -      | -       | - | - |
| rs11136341               | G/A | 0.038  | 6.0E-09  | 0.041  | 7.7E-03 | -      | -       | - | - |
| rs11220462               | A/G | 0.047  | 6.0E-15  | 0.020  | 1.9E-02 | -      | -       | - | - |
| rs11603023               | T/C | 0.022  | 1.0E-08  | 0.032  | 6.3E-03 | -      | -       | - | - |
| rs1169288                | C/A | 0.038  | 6.0E-21  | 0.035  | 1.2E-03 | -      | -       | - | - |
| rs11694172               | G/A | 0.028  | 2.0E-09  | -0.008 | 5.6E-01 | -      | -       | - | - |
| rs12027135               | A/T | -0.027 | 5.0E-12  | -0.029 | 1.4E-03 | -      | -       | - | - |
| rs1260326                | T/C | 0.051  | 3.0E-42  | 0.036  | 3.8E-04 | -      | -       | - | - |
| rs12670798               | C/T | 0.036  | 1.0E-16  | 0.001  | 8.9E-01 | -      | -       | - | - |
| rs12916                  | C/T | 0.068  | 5.0E-74  | 0.078  | 5.7E-22 | -      | -       | - | - |
| rs1367117                | A/G | 0.100  | 3.0E-139 | 0.067  | 1.5E-05 | -      | -       | - | - |
| rs138777                 | A/G | 0.021  | 5.0E-08  | 0.016  | 1.0E-01 | -      | -       | - | - |
| rs1495741                | G/A | 0.032  | 3.0E-08  | 0.015  | 7.7E-02 | -      | -       | - | - |
| rs1532085                | A/G | 0.054  | 7.0E-47  | 0.058  | 3.3E-09 | -      | -       | - | - |
| rs174546                 | T/C | -0.048 | 3.0E-37  | -0.045 | 2.0E-06 | -      | -       | - | - |
| rs1883025                | T/C | -0.067 | 6.0E-53  | -0.074 | 1.5E-14 | -      | -       | - | - |
| rs2000999                | A/G | 0.062  | 7.0E-41  | 0.051  | 2.0E-06 | -      | -       | - | - |
| rs2030746                | T/C | 0.020  | 4.0E-08  | 0.005  | 6.0E-01 | -      | -       | - | - |
| rs2072183                | C/G | 0.036  | 4.0E-15  | -0.006 | 6.8E-01 | -      | -       | - | - |
| rs2081687                | T/C | 0.038  | 9.0E-12  | 0.033  | 1.7E-03 | -      | -       | - | - |
| rs2131925                | G/T | -0.075 | 4.0E-80  | -0.043 | 4.6E-06 | -      | -       | - | - |
| rs2255141                | A/G | 0.031  | 7.0E-16  | 0.030  | 1.1E-03 | -      | -       | - | - |
| rs2277862                | T/C | -0.035 | 5.0E-11  | -0.019 | 1.0E-01 | -      | -       | - | - |
| rs2287623                | G/A | 0.027  | 4.0E-12  | 0.021  | 2.6E-02 | -      | -       | - | - |
| rs2479409                | G/A | 0.054  | 2.0E-39  | -0.004 | 6.3E-01 | -      | -       | - | - |
| rs2642442                | C/T | -0.035 | 3.0E-11  | -0.057 | 9.9E-06 | -      | -       | - | - |
| rs2814982                | T/C | -0.044 | 4.0E-15  | 0.004  | 8.2E-01 | -      | -       | - | - |
| rs2954029                | T/A | -0.062 | 2.0E-65  | -0.066 | 3.8E-16 | -      | -       | - | - |
| rs3177928                | A/G | 0.048  | 1.0E-21  | 0.047  | 3.8E-02 | -      | -       | - | - |
| rs3757354                | T/C | -0.035 | 2.0E-15  | 0.008  | 4.4E-01 | -      | -       | - | - |
| rs3764261                | A/C | 0.050  | 4.0E-31  | 0.080  | 4.8E-08 | -      | -       | - | - |
| rs4420638                | G/A | 0.197  | 1.0E-149 | 0.091  | 6.1E-11 | -      | -       | - | - |
| rs4530754                | G/A | -0.023 | 2.0E-09  | -0.010 | 2.4E-01 | -      | -       | - | - |
| rs4883201                | G/A | -0.035 | 2.0E-09  | -0.030 | 3.2E-03 | -      | -       | - | - |

SUPPLEMENTARY DATA

|                      |     |        |          |        |         |        |         |   |   |
|----------------------|-----|--------|----------|--------|---------|--------|---------|---|---|
| rs514230             | A/T | -0.039 | 5.0E-14  | 0.023  | 5.1E-02 | -      | -       | - | - |
| rs581080             | G/C | -0.038 | 1.0E-13  | -0.007 | 6.0E-01 | -      | -       | - | - |
| rs629301             | G/T | -0.134 | 2.0E-170 | -0.176 | 5.8E-20 | -      | -       | - | - |
| rs6882076            | T/C | -0.051 | 5.0E-04  | -0.038 | 3.1E-05 | -      | -       | - | - |
| rs7241918            | G/T | -0.058 | 4.0E-18  | -0.004 | 7.6E-01 | -      | -       | - | - |
| rs7515577            | C/A | -0.037 | 2.0E-08  | -0.004 | 9.3E-01 | -      | -       | - | - |
| rs9376090            | T/C | -0.025 | 3.0E-09  | 0.058  | 1.3E-09 | -      | -       | - | - |
| rs964184             | C/G | -0.121 | 3.0E-55  | -0.045 | 4.3E-06 | -      | -       | - | - |
| rs970548             | C/A | -0.026 | 8.0E-09  | -0.001 | 9.5E-01 | -      | -       | - | - |
| rs9987289            | A/G | -0.084 | 2.0E-36  | 0.091  | 2.1E-01 | -      | -       | - | - |
| rs6831256            | G/A | -0.022 | 1.0E-10  | 0.015  | 2.4E-01 | -      | -       | - | - |
| rs11065987           | G/A | -0.031 | 2.0E-16  | -      | -       | -      | -       | - | - |
| rs11563251           | T/C | 0.037  | 1E-9     | -      | -       | -      | -       | - | - |
| rs13315871           | A/G | -0.036 | 4E-8     | -      | -       | -      | -       | - | - |
| rs1564348            | C/T | 0.049  | 3.0E-23  | -      | -       | -      | -       | - | - |
| rs1800562            | A/G | -0.056 | 2.0E-12  | -      | -       | -      | -       | - | - |
| rs1800961            | T/C | -0.106 | 1.0E-24  | -      | -       | -      | -       | - | - |
| rs1997243            | G/A | 0.033  | 3E-10    | -      | -       | -      | -       | - | - |
| rs2290159            | C/G | -0.037 | 2.0E-09  | -      | -       | -      | -       | - | - |
| rs2758886            | A/G | 0.023  | 3E-8     | -      | -       | -      | -       | - | - |
| rs2902940            | G/A | -0.024 | 9E-10/   | -      | -       | -      | -       | - | - |
| rs314253             | C/T | -0.023 | 3E-10    | -      | -       | -      | -       | - | - |
| rs3780181            | G/A | -0.044 | 7E-10    | -      | -       | -      | -       | - | - |
| rs4253772            | T/C | 0.032  | 1.0E-08  | -      | -       | -      | -       | - | - |
| rs4299376            | G/T | 0.079  | 3.0E-73  | -      | -       | -      | -       | - | - |
| rs4722551            | C/T | 0.023  | 7.0E-9   | -      | -       | -      | -       | - | - |
| rs492602             | G/A | 0.031  | 1.0E-16  | -      | -       | -      | -       | - | - |
| rs6029526            | A/T | 0.040  | 1.0E-16  | -      | -       | -      | -       | - | - |
| rs6511720            | T/G | -0.185 | 5.0E-202 | -      | -       | -      | -       | - | - |
| rs7206971            | A/G | 0.030  | 1.0E-07  | -      | -       | -      | -       | - | - |
| rs7570971            | A/C | 0.030  | 1.0E-13  | -      | -       | -      | -       | - | - |
| rs7640978            | T/C | -0.038 | 1E-8     | -      | -       | -      | -       | - | - |
| rs7941030            | C/T | 0.028  | 2.0E-14  | -      | -       | -      | -       | - | - |
| rs9411489            | T/C | 0.069  | 3.0E-35  | -      | -       | -      | -       | - | - |
| rs9488822            | T/A | 0.034  | 1.0E-09  | -      | -       | -      | -       | - | - |
| rs10490626           | A/G | 0.042  | 6.0E-09  | -      | -       | -      | -       | - | - |
| <b>Triglycerides</b> |     |        |          |        |         |        |         |   |   |
| rs10401969           | C/T | -0.121 | 1.0E-69  | -0.067 | 4.0E-05 | 0.060  | 6.3E-06 | - | - |
| rs1121980            | A/G | -0.021 | 3.0E-08  | 0.007  | 5.3E-01 | -      | -       | - | - |
| rs11613352           | T/C | -0.028 | 9.0E-14  | -0.025 | 2.7E-01 | 0.010  | 6.9E-01 | - | - |
| rs11776767           | C/G | 0.022  | 3.0E-11  | 0.018  | 1.1E-01 | 0.000  | 7.2E-01 | - | - |
| rs1260326            | T/C | 0.115  | 2.0E-239 | 0.105  | 3.2E-21 | 0.050  | 4.8E-16 | - | - |
| rs12678919           | G/A | -0.170 | 2.0E-199 | -0.150 | 2.6E-26 | -0.100 | 6.0E-16 | - | - |
| rs12748152           | T/C | 0.037  | 1.0E-09  | 0.026  | 6.6E-01 | -      | -       | - | - |
| rs1495741            | G/A | 0.040  | 3.0E-12  | 0.038  | 1.8E-05 | -      | -       | - | - |
| rs1532085            | A/G | 0.031  | 2.0E-18  | 0.058  | 9.9E-08 | 0.020  | 3.7E-03 | - | - |
| rs17145738           | T/C | -0.115 | 9.0E-99  | -0.112 | 8.5E-16 | -0.060 | 3.1E-06 | - | - |
| rs174546             | T/C | 0.045  | 7.0E-38  | 0.035  | 6.5E-04 | 0.020  | 2.4E-02 | - | - |
| rs1832007            | G/A | -0.033 | 2.0E-12  | -0.050 | 9.2E-04 | -      | -       | - | - |
| rs2068888            | A/G | -0.024 | 2.0E-11  | -0.032 | 3.9E-02 | -      | -       | - | - |
| rs2131925            | G/T | -0.066 | 3.0E-74  | -0.065 | 9.5E-11 | -      | -       | - | - |
| rs2929282            | T/A | 0.072  | 2.0E-09  | 0.011  | 6.7E-01 | -      | -       | - | - |
| rs2954029            | T/A | -0.076 | 1.0E-107 | -0.061 | 2.1E-12 | -0.040 | 5.9E-06 | - | - |
| rs2972146            | G/T | -0.028 | 3.0E-15  | -0.008 | 5.7E-01 | -      | -       | - | - |
| rs3764261            | A/C | -0.040 | 2.0E-25  | -0.054 | 1.4E-03 | -0.030 | 1.1E-02 | - | - |
| rs38855              | G/A | -0.019 | 2.0E-08  | -0.017 | 5.4E-02 | -      | -       | - | - |
| rs442177             | G/T | -0.031 | 1.0E-18  | -0.024 | 2.4E-02 | -0.030 | 7.0E-05 | - | - |
| rs4765127            | T/G | -0.029 | 2.0E-08  | -0.005 | 7.6E-01 | -      | -       | - | - |
| rs4846914            | G/A | 0.040  | 7.0E-31  | 0.028  | 3.1E-02 | 0.020  | 3.6E-02 | - | - |

SUPPLEMENTARY DATA

|            |     |        |          |        |         |        |         |       |         |
|------------|-----|--------|----------|--------|---------|--------|---------|-------|---------|
| rs5756931  | C/T | -0.020 | 3.0E-08  | -0.016 | 3.2E-01 | -      | -       | -     | -       |
| rs6065906  | C/T | 0.053  | 2.0E-34  | -      | -       | 0.000  | 9.1E-01 | -     | -       |
| rs645040   | G/T | -0.029 | 2.0E-12  | -0.020 | 1.2E-01 | -      | -       | -     | -       |
| rs6831256  | G/A | 0.026  | 2.0E-12  | 0.050  | 2.8E-05 | -      | -       | -     | -       |
| rs6882076  | T/C | -0.029 | 2.0E-15  | -0.022 | 2.4E-02 | -0.030 | 5.2E-04 | -     | -       |
| rs7248104  | A/G | -0.022 | 5.0E-10  | -0.012 | 1.9E-01 | -      | -       | -     | -       |
| rs731839   | G/A | 0.022  | 3.0E-09  | 0.012  | 2.7E-01 | -      | -       | -     | -       |
| rs964184   | C/G | -0.234 | 7.0E-224 | -0.211 | 1.5E-92 | -      | -       | 0.210 | 1.6E-40 |
| rs9686661  | T/C | 0.038  | 3.0E-16  | 0.029  | 9.7E-02 | 0.020  | 1.1E-01 | -     | -       |
| rs998584   | A/C | 0.029  | 3.0E-15  | 0.021  | 6.8E-02 | -      | -       | -     | -       |
| rs1936800  | C/T | -0.020 | 3.0E-08  | -0.009 | 2.9E-01 | -      | -       | -     | -       |
| rs10761731 | T/A | -0.031 | 8.0E-12  | -      | -       | -      | -       | -     | -       |
| rs11649653 | G/C | -0.027 | 2.0E-07  | -      | -       | -      | -       | -     | -       |
| rs13238203 | T/C | -0.059 | 3.0E-06  | -      | -       | -      | -       | -     | -       |
| rs2412710  | A/G | 0.099  | 2.0E-11  | -      | -       | -      | -       | -     | -       |
| rs3198697  | T/C | -0.020 | 2E-8     | -      | -       | -      | -       | -     | -       |
| rs8077889  | C/A | 0.025  | 1E-8     | -      | -       | -      | -       | -     | -       |
| rs4722551  | C/T | 0.029  | 9E-11    | -      | -       | -      | -       | -     | -       |

Purple cells indicate effects in the same direction as the GLGC study.

Green cells indicate significant P-Values ( $P < 0.05$ )

EA = effect allele; RA = reference allele

SUPPLEMENTARY DATA

**Supplementary Table 11.** Comparison of results for lipid-associated SNPs in Caucasians identified by the Global Lipids Genetic Consortium (GLGC) to findings from genetic studies of lipid levels in non-Caucasians: Information on covariates and sample sizes for each study.

|                          | Sample Size | Covariates                                                                            | BMI adjusted? |
|--------------------------|-------------|---------------------------------------------------------------------------------------|---------------|
| GLGC [1]                 | 188,578     | age, sex                                                                              | NO            |
| <b>Hispanic</b>          |             |                                                                                       |               |
| Zubair et al [2]         | 19829       | age, sex, PCs, and study cite                                                         | NO            |
| Wang et al [3]           | 1450        | age, gender, BMI, smoking, study canter, genetic ancestry, Mexican/Non-Mexican status | YES           |
| Coram et a l[4]          | 3,587       | age, BMI, smoking history, all lipid traits, fasting status (LDL)                     | YES           |
| Below et al[5]           | 4,383       | sex, age, BMI first PC, diabetes status                                               | -             |
| <b>African Americans</b> |             |                                                                                       |               |
| Zubair et al             | 21304       | age, sex, and PCs and some study cite                                                 | NO            |
| Wang et al               | 1677        | age, gender, BMI, smoking, study center, genetic ancestry                             | YES           |
| <b>Asian</b>             |             |                                                                                       |               |
| Zubair et al             | 12,456      | age, sex, and PCs and some study cite                                                 | NO            |
| Wang et al               | 775         | age, gender, BMI, smoking, study cite, genetic ancestry                               | YES           |
| AGEN[6]                  | 69,414      | age, sex                                                                              | NO            |
| Braun et al [7]          | 6,530       | age, gender, BMI, disease status                                                      | YES           |

1. Willer, C.J., et al., *Discovery and Refinement of Loci Associated with Lipid Levels*. Nat Genet, 2013. **45**(11): p. 1274-83.
2. Zubair, N., et al., *Fine-mapping of lipid regions in global populations discovers ethnic-specific signals and refines previously identified lipid loci*. Hum Mol Genet, 2016. **25**(24): p. 5500-5512.
3. Wang, Z., et al., *Genetic associations with lipoprotein subfraction measures differ by ethnicity in the multi-ethnic study of atherosclerosis (MESA)*. Hum Genet, 2017. **136**(6): p. 715-726.
4. Coram, M.A., et al., *Genome-wide characterization of shared and distinct genetic components that influence blood lipid levels in ethnically diverse human populations*. Am J Hum Genet, 2013. **92**(6): p. 904-16.
5. Below, J.E., et al., *Meta-analysis of lipid-traits in Hispanics identifies novel loci, population-specific effects, and tissue-specific enrichment of eQTLs*. Sci Rep, 2016. **6**: p. 19429.
6. Spracklen, C.N., et al., *Association analyses of East Asian individuals and trans-ancestry analyses with European individuals reveal new loci associated with cholesterol and triglyceride levels*. Hum Mol Genet, 2017. **26**(9): p. 1770-1784.
7. Braun, T.R., et al., *A replication study of GWAS-derived lipid genes in Asian Indians: the chromosomal region 11q23.3 harbors loci contributing to triglycerides*. PLoS One, 2012. **7**(5): p. e37056.



SUPPLEMENTARY DATA

**Supplementary Table 12.** Comparison of findings for lipid-associated SNPs from the Global Lipids Genetic Consortium (GLGC) study and findings for lipid-associated SNPs in the exclusively diabetic population of the ACCORD study[8].

| SNP        | Minor/major allele | GLGC Study        |                        |               |                        |         |                        |               |                        | ACCORD Results    |                        |               |                        |         |                        |               |                        |
|------------|--------------------|-------------------|------------------------|---------------|------------------------|---------|------------------------|---------------|------------------------|-------------------|------------------------|---------------|------------------------|---------|------------------------|---------------|------------------------|
|            |                    | Total Cholesterol |                        | LDL           |                        | HDL     |                        | Triglycerides |                        | Total Cholesterol |                        | LDL           |                        | HDL     |                        | Triglycerides |                        |
|            |                    | $\beta$           | $-\log_{10}$ (p-value) | $\beta$       | $-\log_{10}$ (p-value) | $\beta$ | $-\log_{10}$ (p-value) | $\beta$       | $-\log_{10}$ (p-value) | $\beta$           | $-\log_{10}$ (p-value) | $\beta$       | $-\log_{10}$ (p-value) | $\beta$ | $-\log_{10}$ (p-value) | $\beta$       | $-\log_{10}$ (p-value) |
| rs1077514  | C/T                | -0.030            | 8.22                   |               |                        |         |                        |               |                        | -0.052            | 2.50                   |               |                        |         |                        |               |                        |
| rs12027135 | A/T                | -0.027            | 11.30                  | -0.030        | 13.70                  |         |                        |               |                        | 0.001             | 0.03                   | -0.004        | 0.10                   |         |                        |               |                        |
| rs12748152 | T/C                |                   |                        | 0.050         | 11.52                  | -0.051  | 15.00                  | 0.037         | 9.00                   |                   |                        | -0.013        | 0.18                   | -0.003  | 0.04                   | -0.030        | 0.50                   |
| rs4660293  | G/A                |                   |                        |               |                        | -0.035  | 17.52                  |               |                        |                   |                        |               |                        | -0.015  | 0.44                   |               |                        |
| rs2479409  | G/A                | 0.054             | 38.70                  | 0.064         | 49.52                  |         |                        |               |                        | 0.016             | 0.58                   | 0.010         | 0.30                   |         |                        |               |                        |
| rs2131925  | G/T                | -0.075            | 79.40                  | -0.049        | 31.52                  |         |                        | <b>-0.066</b> | <b>73.52</b>           | -0.054            | 3.67                   | -0.003        | 0.09                   |         |                        | <b>-0.093</b> | <b>9.31</b>            |
| rs7515577  | C/A                | -0.037            | 7.70                   |               |                        |         |                        |               |                        | -0.002            | 0.03                   |               |                        |         |                        |               |                        |
| rs629301   | G/T                | <b>-0.134</b>     | <b>169.70</b>          | <b>-0.167</b> | <b>240.30</b>          |         |                        |               |                        | <b>-0.096</b>     | <b>8.43</b>            | <b>-0.135</b> | <b>14.63</b>           |         |                        |               |                        |
| rs267733   | G/A                |                   |                        | -0.033        | 8.30                   |         |                        |               |                        |                   |                        | -0.039        | 1.10                   |         |                        |               |                        |
| rs12145743 | G/T                |                   |                        |               |                        | 0.020   | 7.70                   |               |                        |                   |                        |               |                        | 0.017   | 0.58                   |               |                        |
| rs4650994  | G/A                |                   |                        |               |                        | 0.021   | 8.15                   |               |                        |                   |                        |               |                        | -0.003  | 0.07                   |               |                        |
| rs1689800  | G/A                |                   |                        |               |                        | -0.034  | 19.30                  |               |                        |                   |                        |               |                        | -0.020  | 0.82                   |               |                        |
| rs2642442  | C/T                | -0.035            | 10.52                  | -0.036        | 10.30                  |         |                        |               |                        | -0.019            | 0.68                   | -0.014        | 0.41                   |         |                        |               |                        |
| rs4846914  | G/A                |                   |                        |               |                        | -0.048  | 40.40                  | 0.040         | 30.15                  |                   |                        |               |                        | 0.037   | 1.95                   | -0.022        | 0.83                   |
| rs514230   | A/T                | -0.039            | 13.30                  | -0.036        | 11.05                  |         |                        |               |                        | -0.012            | 0.41                   | -0.018        | 0.63                   |         |                        |               |                        |
| rs1367117  | A/G                | 0.100             | 138.52                 | 0.119         | 182.00                 |         |                        |               |                        | 0.051             | 2.81                   | 0.054         | 2.87                   |         |                        |               |                        |
| rs1260326  | T/C                | 0.051             | 41.52                  |               |                        |         |                        | <b>0.115</b>  | <b>238.70</b>          | 0.045             | 2.60                   |               |                        |         |                        | <b>0.093</b>  | <b>8.88</b>            |
| rs4299376  | G/T                | 0.079             | 72.52                  | 0.081         | 71.40                  |         |                        |               |                        | -0.034            | 1.49                   | -0.038        | 1.68                   |         |                        |               |                        |
| rs2710642  | G/A                |                   |                        | -0.024        | 8.22                   |         |                        |               |                        |                   |                        | 0.006         | 0.17                   |         |                        |               |                        |
| rs10490626 | A/G                | -0.042            | 8.22                   | -0.051        | 11.70                  |         |                        |               |                        | 0.025             | 0.41                   | 0.015         | 0.21                   |         |                        |               |                        |
| rs2030746  | T/C                | 0.020             | 7.40                   | 0.021         | 8.05                   |         |                        |               |                        | 0.034             | 1.78                   | 0.042         | 2.37                   |         |                        |               |                        |
| rs7570971  | A/C                | 0.030             | 13.00                  |               |                        |         |                        |               |                        | -0.018            | 0.61                   |               |                        |         |                        |               |                        |
| rs12328675 | C/T                |                   |                        |               |                        | 0.045   | 14.70                  |               |                        |                   |                        |               |                        | 0.001   | 0.02                   |               |                        |
| rs2287623  | G/A                | 0.027             | 11.40                  |               |                        |         |                        |               |                        | 0.020             | 0.77                   |               |                        |         |                        |               |                        |
| rs11694172 | G/A                | 0.028             | 8.70                   |               |                        |         |                        |               |                        | 0.000             | 0.00                   |               |                        |         |                        |               |                        |
| rs1047891  | A/C                |                   |                        |               |                        | -0.027  | 9.05                   |               |                        |                   |                        |               |                        | -0.013  | 0.41                   |               |                        |
| rs1250229  | T/C                |                   |                        | -0.024        | 7.52                   |         |                        |               |                        |                   |                        | -0.011        | 0.27                   |         |                        |               |                        |
| rs2972146  | G/T                |                   |                        |               |                        | 0.032   | 16.70                  | -0.028        | 14.52                  |                   |                        |               |                        | 0.028   | 1.17                   | -0.031        | 1.28                   |
| rs11563251 | T/C                | 0.037             | 9.00                   | 0.034         | 7.30                   |         |                        |               |                        | 0.044             | 1.59                   | 0.068         | 3.00                   |         |                        |               |                        |
| rs2606736  | C/T                |                   |                        |               |                        | 0.025   | 7.30                   |               |                        |                   |                        |               |                        | 0.001   | 0.03                   |               |                        |
| rs2290159  | C/G                | -0.037            | 8.70                   |               |                        |         |                        |               |                        | -0.018            | 0.54                   |               |                        |         |                        |               |                        |
| rs7640978  | T/C                | -0.038            | 7.70                   | -0.039        | 8.00                   |         |                        |               |                        | -0.026            | 0.65                   | -0.037        | 1.01                   |         |                        |               |                        |



SUPPLEMENTARY DATA

|            |     |        |       |        |        |              |               |               |               |  |  |  |              |              |               |              |      |
|------------|-----|--------|-------|--------|--------|--------------|---------------|---------------|---------------|--|--|--|--------------|--------------|---------------|--------------|------|
| rs4731702  | T/C |        |       |        | 0.029  | 16.30        |               |               |               |  |  |  | 0.010        | 0.34         |               |              |      |
| rs17173637 | C/T |        |       |        | -0.036 | 7.70         |               |               |               |  |  |  | -0.044       | 1.14         |               |              |      |
| rs9987289  | A/G | -0.084 | 35.70 | -0.071 | 23.05  | -0.082       | 40.70         |               |               |  |  |  | -0.032       | 0.83         | -0.014        | 0.27         |      |
| rs11776767 | C/G |        |       |        |        |              |               | 0.022         | 10.52         |  |  |  |              |              |               | 0.017        | 0.57 |
| rs1495741  | G/A | 0.032  | 7.52  |        |        |              |               | 0.040         | 11.52         |  |  |  | 0.012        | 0.36         |               | 0.013        | 0.39 |
| rs12678919 | G/A |        |       |        |        | <b>0.155</b> | <b>149.00</b> | <b>-0.170</b> | <b>198.70</b> |  |  |  | <b>0.200</b> | <b>17.26</b> | <b>-0.192</b> | <b>14.28</b> |      |
| rs10102164 | A/G | 0.030  | 10.30 | 0.032  | 10.40  |              |               |               |               |  |  |  | 0.009        | 0.23         | 0.025         | 0.77         |      |
| rs2081687  | T/C | 0.038  | 11.05 | 0.031  | 7.00   |              |               |               |               |  |  |  | 0.028        | 1.17         | 0.021         | 0.72         |      |
| rs2293889  | T/G |        |       |        |        | -0.031       | 16.40         |               |               |  |  |  |              |              | -0.038        | 2.01         |      |
| rs2954029  | T/A | -0.062 | 64.70 | -0.056 | 49.70  | 0.040        | 28.52         | -0.076        | 107.00        |  |  |  | -0.057       | 4.42         | -0.036        | 1.89         |      |
| rs11136341 | G/A | 0.038  | 8.22  | 0.045  | 11.15  |              |               |               |               |  |  |  | -0.011       | 0.35         | 0.004         | 0.11         |      |
| rs3780181  | G/A | -0.044 | 9.15  | -0.044 | 8.70   |              |               |               |               |  |  |  | -0.045       | 1.16         | -0.052        | 1.35         |      |
| rs581080   | G/C | -0.038 | 13.00 |        |        | -0.042       | 19.00         |               |               |  |  |  | 0.007        | 0.18         |               | -0.014       | 0.42 |
| rs1883025  | T/C | -0.067 | 52.22 |        |        | -0.070       | 64.70         |               |               |  |  |  | -0.034       | 1.55         |               | -0.035       | 1.73 |
| rs9411489  | T/C | 0.069  | 34.52 | 0.077  | 40.70  |              |               |               |               |  |  |  |              |              |               |              |      |
| rs1832007  | G/A |        |       |        |        |              |               | -0.033        | 11.70         |  |  |  |              |              |               | 0.021        | 0.49 |
| rs10904908 | G/A | 0.025  | 10.52 |        |        |              |               |               |               |  |  |  | 0.013        | 0.44         |               |              |      |
| rs970548   | C/A | 0.025  | 8.10  |        |        | 0.026        | 9.70          |               |               |  |  |  | 0.020        | 0.62         |               | 0.032        | 1.34 |
| rs10761731 | T/A |        |       |        |        |              |               | -0.031        | 11.10         |  |  |  |              |              |               | -0.028       | 1.28 |
| rs2068888  | A/G |        |       |        |        |              |               | -0.024        | 10.70         |  |  |  |              |              |               | -0.042       | 2.38 |
| rs2255141  | A/G | 0.031  | 15.15 | 0.030  | 13.00  |              |               |               |               |  |  |  | -0.011       | 0.29         | -0.020        | 0.64         |      |
| rs2923084  | G/A |        |       |        |        | -0.026       | 7.30          |               |               |  |  |  |              |              | -0.005        | 0.12         |      |
| rs10128711 | T/C | -0.031 | 11.00 |        |        |              |               |               |               |  |  |  | -0.039       | 1.96         |               |              |      |
| rs3136441  | C/T |        |       |        |        | 0.054        | 28.15         |               |               |  |  |  |              |              | 0.005         | 0.08         |      |
| rs11246602 | C/T |        |       |        |        | 0.034        | 9.70          |               |               |  |  |  |              |              | -0.018        | 0.39         |      |
| rs174546   | T/C | -0.048 | 36.52 | -0.051 | 38.70  | -0.039       | 27.10         | 0.045         | 37.15         |  |  |  | -0.005       | 0.12         | -0.024        | 0.89         |      |
| rs12801636 | A/G |        |       |        |        | 0.024        | 7.52          |               |               |  |  |  |              |              | -0.061        | 4.41         |      |
| rs499974   | A/C |        |       |        |        | -0.026       | 8.00          |               |               |  |  |  |              |              | 0.016         | 0.51         |      |
| rs964184*  | C/G | -0.121 | 54.52 | -0.086 | 25.70  | 0.106        | 47.22         | <b>-0.234</b> | <b>223.15</b> |  |  |  | -0.072       | 4.09         | -0.027        | 0.78         |      |
| rs11603023 | T/C | 0.022  | 8.00  |        |        |              |               |               |               |  |  |  | 0.084        | 5.05         | -0.027        | 0.78         |      |
| rs7941030  | C/T | 0.028  | 13.70 |        |        | 0.027        | 14.00         |               |               |  |  |  | 0.019        | 0.76         |               |              |      |
| rs11220462 | A/G | 0.047  | 14.22 | 0.059  | 20.15  |              |               |               |               |  |  |  | 0.056        | 4.07         |               | 0.030        |      |
| rs4883201  | G/A | -0.035 | 8.70  |        |        |              |               |               |               |  |  |  | 0.039        | 1.17         | 0.036         | 0.99         |      |
| rs7134375  | A/C |        |       |        |        | 0.021        | 8.00          |               |               |  |  |  | 0.004        | 0.07         |               |              |      |
| rs11613352 | T/C |        |       |        |        | 0.028        | 12.70         | -0.028        | 13.05         |  |  |  |              |              | 0.028         | 1.38         |      |
| rs7134594  | C/T |        |       |        |        | -0.035       | 12.70         |               |               |  |  |  |              |              | 0.007         | 0.17         |      |
| rs11065987 | G/A | -0.031 | 15.70 | -0.027 | 11.00  |              |               |               |               |  |  |  | -0.051       | 3.67         | -0.019        | 0.53         |      |
| rs1169288  | C/A | 0.032  | 16.40 | 0.038  | 20.22  |              |               |               |               |  |  |  | -0.039       | 1.93         | -0.034        | 1.46         |      |
| rs4759375  | T/C |        |       |        |        | 0.056        | 7.52          |               |               |  |  |  | 0.048        | 2.66         | 0.048         | 2.55         |      |
|            |     |        |       |        |        |              |               |               |               |  |  |  | 0.028        | 0.73         |               |              |      |

SUPPLEMENTARY DATA

|            |     |        |        |        |               |              |               |        |        |        |        |        |               |              |              |        |      |
|------------|-----|--------|--------|--------|---------------|--------------|---------------|--------|--------|--------|--------|--------|---------------|--------------|--------------|--------|------|
| rs4765127  | T/G |        |        |        | 0.032         | 9.10         | -0.029        | 7.70   |        |        |        |        | 0.017         | 0.63         | -0.011       | 0.32   |      |
| rs838880   | C/T |        |        |        | 0.048         | 31.22        |               |        |        |        |        |        | 0.024         | 1.02         |              |        |      |
| rs4942486  | T/C |        | 0.024  | 10.70  |               |              |               |        | 0.017  | 0.60   |        |        |               |              |              |        |      |
| rs8017377  | A/G |        | 0.030  | 14.52  |               |              |               |        | 0.031  | 1.31   |        |        |               |              |              |        |      |
| rs4983559  | G/A |        |        |        | 0.020         | 8.00         |               |        |        |        |        |        | 0.010         | 0.32         |              |        |      |
| rs2412710  | A/G |        |        |        |               |              | 0.099         | 10.70  |        |        |        |        |               |              | 0.043        | 0.50   |      |
| rs2929282  | T/A |        |        |        |               |              | 0.072         | 8.70   |        |        |        |        |               |              | 0.051        | 1.37   |      |
| rs1532085  | A/G | 0.054  | 46.15  |        | 0.107         | 188.00       | 0.031         | 17.70  | -0.008 | 0.24   |        |        | 0.084         | 9.25         | -0.018       | 0.66   |      |
| rs2652834  | A/G |        |        |        | -0.028        | 10.40        |               |        |        |        |        |        | -0.016        | 0.47         |              |        |      |
| rs3198697  | T/C |        |        |        |               |              | -0.020        | 7.70   |        |        |        |        |               |              | -0.019       | 0.61   |      |
| rs11649653 | G/C |        |        |        |               |              | -0.027        | 6.70   |        |        |        |        |               |              | -0.033       | 1.43   |      |
| rs1121980  | A/G |        |        |        | -0.020        | 8.15         | 0.021         | 7.52   |        |        |        |        | -0.003        | 0.10         | -0.014       | 0.46   |      |
| rs3764261  | A/C | 0.050  | 30.40  | -0.053 | 33.70         | <b>0.241</b> | <b>769.00</b> | -0.040 | 24.70  | 0.048  | 2.84   | 0.001  | 0.03          | <b>0.192</b> | <b>39.66</b> | -0.005 | 0.13 |
| rs16942887 | A/G |        |        |        | 0.083         | 53.10        |               |        |        |        |        |        | 0.072         | 3.79         |              |        |      |
| rs2000999  | A/G | 0.062  | 40.15  | 0.065  | 40.40         |              |               |        |        | 0.057  | 2.86   | 0.061  | 3.03          |              |              |        |      |
| rs2925979  | T/C |        |        |        | -0.035        | 19.00        |               |        |        |        |        |        | -0.019        | 0.69         |              |        |      |
| rs314253   | C/T | -0.023 | 9.52   | -0.024 | 9.52          |              |               |        |        | 0.003  | 0.09   | 0.011  | 0.35          |              |              |        |      |
| rs11869286 | G/C |        |        |        | -0.032        | 16.52        |               |        |        |        |        |        | -0.014        | 0.50         |              |        |      |
| rs8077889  | C/A |        |        |        |               |              | 0.025         | 8.00   |        |        |        |        |               |              | 0.015        | 0.40   |      |
| rs7206971  | A/G | 0.030  | 7.00   | 0.029  | 6.52          |              |               |        | -0.018 | 0.68   | -0.008 | 0.25   |               |              |              |        |      |
| rs1801689  | C/A |        |        | 0.103  | 11.00         |              |               |        |        |        | 0.029  | 0.29   |               |              |              |        |      |
| rs4148008  | G/C |        |        |        | -0.028        | 12.00        |               |        |        |        |        |        | -0.011        | 0.35         |              |        |      |
| rs4129767  | G/A |        |        |        | -0.024        | 10.70        |               |        |        |        |        |        | 0.030         | 1.52         |              |        |      |
| rs7241918  | G/T | -0.058 | 17.40  |        | <b>-0.090</b> | <b>44.00</b> |               |        | 0.009  | 0.18   |        |        | <b>-0.120</b> | <b>8.70</b>  |              |        |      |
| rs12967135 | A/G |        |        |        | -0.026        | 7.40         |               |        |        |        |        |        | 0.000         | 0.01         |              |        |      |
| rs7248104  | A/G |        |        |        |               |              | -0.022        | 9.30   |        |        |        |        |               |              | -0.028       | 1.22   |      |
| rs7255436  | C/A |        |        |        | -0.032        | 7.70         |               |        |        |        |        |        | 0.022         | 0.91         |              |        |      |
| rs6511720  | T/G | -0.185 | 201.30 | -0.221 | 261.40        |              |               |        | -0.056 | 1.96   | -0.065 | 2.37   |               |              |              |        |      |
| rs737337   | C/T |        |        |        | -0.056        | 16.30        |               |        |        |        |        |        | -0.048        | 1.92         |              |        |      |
| rs10401969 | C/T | -0.137 | 76.40  | -0.118 | 53.52         |              |               | -0.121 | 69.00  | -0.050 | 1.55   | -0.015 | 0.28          |              |              | -0.069 | 2.47 |
| rs731839   | G/A |        |        |        | -0.022        | 8.52         | 0.022         | 8.52   |        |        |        |        | 0.011         | 0.38         | -0.004       | 0.10   |      |
| rs4420638  | G/A | 0.197  | 149.00 | 0.225  | 177.70        | -0.067       | 20.70         |        |        | 0.055  | 2.52   | 0.040  | 1.41          | -0.094       | 6.78         |        |      |
| rs492602   | G/A | 0.031  | 16.00  |        |               |              |               |        |        | 0.021  | 0.82   |        |               |              |              |        |      |
| rs17695224 | A/G |        |        |        | -0.029        | 12.70        |               |        |        |        |        |        | -0.005        | 0.13         |              |        |      |
| rs386000   | C/G |        |        |        | 0.048         | 22.52        |               |        |        |        |        |        | 0.054         | 3.08         |              |        |      |
| rs364585   | A/G |        |        | -0.025 | 9.40          |              |               |        |        |        | -0.034 | 1.53   |               |              |              |        |      |
| rs2328223  | C/A |        |        | 0.030  | 8.22          |              |               |        |        |        | -0.001 | 0.01   |               |              |              |        |      |
| rs2277862  | T/C | -0.035 | 10.30  |        |               |              |               |        | -0.025 | 0.74   |        |        |               |              |              |        |      |
| rs2902940  | G/A | -0.024 | 9.05   | -0.027 | 10.70         |              |               |        | 0.014  | 0.44   | 0.029  | 1.19   |               |              |              |        |      |

SUPPLEMENTARY DATA

|           |     |        |       |       |       |        |       |        |       |        |      |        |      |        |      |        |      |
|-----------|-----|--------|-------|-------|-------|--------|-------|--------|-------|--------|------|--------|------|--------|------|--------|------|
| rs6029526 | A/T | 0.040  | 16.00 | 0.044 | 17.30 |        |       |        |       | -0.020 | 0.77 | -0.031 | 1.47 |        |      |        |      |
| rs1800961 | T/C | -0.106 | 24.00 |       |       | -0.127 | 33.70 |        |       | -0.083 | 1.29 |        |      | -0.084 | 1.38 |        |      |
| rs6065906 | C/T |        |       |       |       | -0.059 | 39.30 | 0.053  | 33.70 |        |      |        |      | -0.030 | 0.99 | 0.029  | 0.88 |
| rs181362  | T/C |        |       |       |       | -0.038 | 17.40 |        |       |        |      |        |      | -0.025 | 0.96 |        |      |
| rs5763662 | T/C |        |       | 0.077 | 8.00  |        |       |        |       |        |      | 0.011  | 0.11 |        |      |        |      |
| rs138777  | A/G | 0.021  | 7.30  |       |       |        |       |        |       | 0.005  | 0.15 |        |      |        |      |        |      |
| rs5756931 | C/T |        |       |       |       |        |       | -0.020 | 7.52  |        |      |        |      |        |      | -0.005 | 0.12 |
| rs4253772 | T/C | 0.032  | 8.00  | 0.031 | 7.52  |        |       |        |       | 0.017  | 0.32 | 0.030  | 0.63 |        |      |        |      |

Blue cells indicate effects in the same direction as the GLGC study.

Green cells indicate significant P-Values (P<0.05)

- Marvel, S.W., et al., *Common and rare genetic markers of lipid variation in subjects with type 2 diabetes from the ACCORD clinical trial*. PeerJ, 2017. 5: p. e3187.

## SUPPLEMENTARY DATA

### Supplementary Table 13. List of Collaborators from the Asian Genetic Epidemiology Network (AGEN) Consortium

Cassandra N. Spracklen<sup>1</sup>, Peng Chen<sup>2,3</sup>, Young Jin Kim<sup>4</sup>, Xu Wang<sup>5</sup>, Hui Cai<sup>6</sup>, Shengxu Li<sup>7</sup>, Jirong Long<sup>6</sup>, Ying Wu<sup>1</sup>, Ya-Xing Wang<sup>8</sup>, Fumihiko Takeuchi<sup>9</sup>, Jer-Yuarn Wu<sup>10,11</sup>, Keum-Ji Jung<sup>12</sup>, Cheng Hu<sup>13</sup>, Koichi Akiyama<sup>9</sup>, Yonghong Zhang<sup>14</sup>, Sanghoon Moon<sup>4</sup>, Todd A. Johnson<sup>15</sup>, Huaixing Li<sup>16</sup>, Rajkumar Dorajoo<sup>17</sup>, Meian He<sup>18</sup>, Maren E. Cannon<sup>1</sup>, Tamara S. Roman<sup>1</sup>, Elias Salfati<sup>19</sup>, Keng-Hung Lin<sup>20</sup>, Wayne H.H. Sheu<sup>22,23,24,25</sup>, Devin Absher<sup>26</sup>, Linda S. Adair<sup>27</sup>, Themistocles L. Assimes<sup>19</sup>, Tin Aung<sup>28,29,30</sup>, Qiuyin Cai<sup>6</sup>, Li-Ching Chang<sup>10</sup>, Chien-Hsiun Chen<sup>10,11</sup>, Li-Hsin Chien<sup>31</sup>, Lee-Ming Chuang<sup>32,33,34</sup>, Shu-Chun Chuang<sup>31</sup>, Shufa Du<sup>27,35</sup>, Cathy S.J. Fann<sup>10</sup>, Alan B. Feranil<sup>36,37</sup>, Yechiel Friedlander<sup>38</sup>, Penny Gordon-Larsen<sup>27,35</sup>, Dongfeng Gu<sup>39</sup>, Lixuan Gui<sup>1</sup>, Zhirong Guo<sup>14</sup>, Chew-Kiat Heng<sup>40,41</sup>, James Hixson<sup>42</sup>, Xuhong Hou<sup>13</sup>, Chao Agnes Hsiung<sup>31</sup>, Yao Hu<sup>16</sup>, Mi Yeong Hwang<sup>4</sup>, Chii-Min Hwu<sup>23,43</sup>, Masato Isono<sup>9</sup>, Jyh-Ming Jimmy Juang<sup>33,44</sup>, Chiea-Chuen Khor<sup>17,45</sup>, Yun Kyoung Kim<sup>4</sup>, Woon-Puay Koh<sup>2,29</sup>, Michiaki Kubo<sup>46</sup>, I-Te Lee<sup>22,23,47</sup>, Sun-Ju Lee<sup>12</sup>, Kae-Woei Liang<sup>23,50,51</sup>, Blanche Lim<sup>28</sup>, Sing-Hui Lim<sup>28</sup>, Jianjun Liu<sup>2,17,52</sup>, Toru Nabika<sup>53</sup>, Wen-Harn Pan<sup>10</sup>, Hao Peng<sup>14</sup>, Thomas Quertermous<sup>19</sup>, Charumathi Sabanayagam<sup>28,29</sup>, Jinxiu Shi<sup>54</sup>, Liang Sun<sup>16</sup>, Pok Chien Tan<sup>28</sup>, Shu-Pei Tan<sup>28</sup>, Kent D. Taylor<sup>21</sup>, Yik-Ying Teo<sup>2,5,17,55,56</sup>, Sue-Anne Toh<sup>52</sup>, Tatsuhiko Tsunoda<sup>15,57</sup>, Rob M. van Dam<sup>2</sup>, Aili Wang<sup>14</sup>, Feijie Wang<sup>16</sup>, Jie Wang<sup>13</sup>, Wen Bin Wei<sup>58</sup>, Yong-Bing Xiang<sup>59</sup>, Jie Yao<sup>21</sup>, Jian-Min Yuan<sup>60,61</sup>, Rong Zhang<sup>13</sup>, Wanting Zhao<sup>28,29</sup>, Stephen S. Rich<sup>62</sup>, Tzung-Dau Wang<sup>33,44</sup>, Tangchun Wu<sup>18</sup>, Xu Lin<sup>16</sup>, Bok-Ghee Han<sup>63</sup>, Toshihiro Tanaka<sup>64,65</sup>, Yoon Shin Cho<sup>66</sup>, Tomohiro Katsuya<sup>67</sup>, Weiping Jia<sup>13</sup>, Sun-Ha Jee<sup>12</sup>, Yuan-Tsong Chen<sup>10</sup>, Norihiro Kato<sup>9</sup>, Jost B. Jonas<sup>8,68</sup>, Xiao-Ou Shu<sup>6</sup>, Jiang He<sup>7</sup>, Wei Zheng<sup>6</sup>, Wei Huang<sup>54</sup>, Bong-Jo Kim<sup>4</sup>, E-Shyong Tai<sup>2,29,52</sup>, Karen L. Mohlke<sup>1</sup>, Xueling Sim<sup>2</sup>

<sup>1</sup>Department of Genetics, University of North Carolina, Chapel Hill, North Carolina, USA

<sup>2</sup>Saw Swee Hock School of Public Health, National University Health System, National University of Singapore, Singapore, Singapore

<sup>3</sup>Key Laboratory of Pathobiology, Ministry of Education, Jilin University, Changchun, China

<sup>4</sup>Division of Structural and Functional Genomics, Center for Genome Science, Korean National Institute of Health, Osong, Chungchungbuk-do, South Korea

<sup>5</sup>Life Sciences Institute, National University of Singapore, Singapore, Singapore

<sup>6</sup>Division of Epidemiology, Department of Medicine, Vanderbilt-Ingram Cancer Center, Vanderbilt University Medical Center, Nashville, Tennessee, USA

<sup>7</sup>Department of Epidemiology, Tulane University School of Public Health and Tropical Medicine, New Orleans, Louisiana, USA

<sup>8</sup>Beijing Institute of Ophthalmology, Beijing Ophthalmology and Visual Science Key Lab, Beijing Tongren Eye Center, Beijing Tongren Hospital, Capital Medical University, Beijing, China

<sup>9</sup>National Center for Global Health and Medicine, Tokyo, Japan

<sup>10</sup>Institute of Biomedical Sciences, Academia Sinica, Taipei, Taiwan

<sup>11</sup>School of Chinese Medicine, China Medical University, Taichung, Taiwan

<sup>12</sup>Institute for Health Promotion, Graduate School of Public Health, Yonsei University, Seoul, Korea

<sup>13</sup>Shanghai Diabetes Institute, Shanghai Jiaotong University Affiliated Sixth People's Hospital, Shanghai, China

<sup>14</sup>Department of Epidemiology, School of Public Health and Jiangsu Key Laboratory of Preventive and Translational Medicine for Geriatric Diseases, Medical College of Soochow University, Suzhou, China

<sup>15</sup>Laboratory for Medical Science Mathematics, RIKEN Center for Integrative Medical Sciences, Yokohama, Japan

<sup>16</sup>Institute for Nutritional Sciences, Shanghai Institutes for Biological Sciences, Chinese Academy of Sciences, University of the Chinese Academy of Sciences, Shanghai, China

<sup>17</sup>Genome Institute of Singapore, Agency for Science, Technology and Research, Singapore, Singapore

<sup>18</sup>Department of Occupational and Environmental Health and State Key Laboratory of Environmental Health for Incubating, School of Public Health, Tongji Medical College, Huazhong University of Science and Technology, Wuhan, Hubei, China

<sup>19</sup>Department of Medicine, Stanford University School of Medicine, Stanford, California, USA

<sup>20</sup>Department of Ophthalmology, Taichung Veterans General Hospital, Taichung, Taiwan

## SUPPLEMENTARY DATA

- <sup>22</sup>Division of Endocrinology and Metabolism, Department of Internal Medicine, Taichung Veterans General Hospital, Taichung, Taiwan
- <sup>23</sup>School of Medicine, National Yang-Ming University, Taipei, Taiwan
- <sup>24</sup>School of Medicine, National Defense Medical Center, Taipei, Taiwan
- <sup>25</sup>Institute of Medical Technology, National Chung-Hsing University, Taichung, Taiwan
- <sup>26</sup>HudsonAlpha Institute for Biotechnology, Huntsville, Alabama, USA
- <sup>27</sup>Department of Nutrition, Gillings School of Global Public Health, University of North Carolina, Chapel Hill, North Carolina, USA
- <sup>28</sup>Singapore Eye Research Institute, Singapore National Eye Centre, Singapore, Singapore
- <sup>29</sup>Duke-NUS Medical School Singapore, Singapore, Singapore
- <sup>30</sup>Department of Ophthalmology, Yong Loo Lin School of Medicine, National University of Singapore, Singapore, Singapore
- <sup>31</sup>Institute of Population Health Sciences, National Health Research Institutes, Miaoli, Taiwan
- <sup>32</sup>Division of Endocrinology & Metabolism, Department of Internal Medicine, National Taiwan University Hospital, Taipei, Taiwan
- <sup>33</sup>College of Medicine, National Taiwan University, Taipei, Taiwan
- <sup>34</sup>Institute of Preventive Medicine, School of Public Health, National Taiwan University, Taipei, Taiwan
- <sup>35</sup>Carolina Population Center, University of North Carolina, Chapel Hill, North Carolina, USA
- <sup>36</sup>USC-Office of Population Studies Foundation, Inc., University of San Carlos, Cebu City, Philippines
- <sup>37</sup>Department of Anthropology, Sociology, and History, University of San Carlos, Cebu City, Philippines
- <sup>38</sup>Unit of Epidemiology, Hebrew University-Hadassah Braun School of Public Health, Jerusalem, Israel
- <sup>39</sup>Department of Epidemiology and Population Genetics, Fuwai Hospital, Beijing, China
- <sup>40</sup>Department of Paediatrics, Yong Loo Lin School of Medicine, National University of Singapore, Singapore
- <sup>41</sup>Khoo Teck Puat-National University Children's Medical Institute, National University Health System, Singapore
- <sup>42</sup>Human Genetics Center, University of Texas School of Public Health, Houston, Texas, USA
- <sup>43</sup>Section of Endocrinology and Metabolism, Department of Medicine, Taipei Veterans General Hospital, Taipei, Taiwan
- <sup>44</sup>Cardiovascular Center and Division of Cardiology, Department of Internal Medicine, National Taiwan University Hospital, Taipei, Taiwan
- <sup>45</sup>Department of Biochemistry, National University of Singapore, Singapore, Singapore
- <sup>46</sup>RIKEN Center for Integrative Medical Sciences, Yokohama, Japan
- <sup>47</sup>School of Medicine, Chung Shan Medical University, Taichung, Taiwan
- <sup>50</sup>Cardiovascular Center, Taichung Veterans General Hospital, Taichung, Taiwan
- <sup>51</sup>Department of Medicine, China Medical University, Taichung, Taiwan
- <sup>52</sup>Department of Medicine, Yong Loo Lin School of Medicine, National University of Singapore, Singapore, Singapore
- <sup>53</sup>Department of Functional Pathology, Shimane University School of Medicine, Izumo, Japan
- <sup>54</sup>Department of Genetics, Shanghai-MOST Key Laboratory of Health and Disease Genomics, Chinese National Human Genome Center and Shanghai Industrial Technology Institute, Shanghai, China
- <sup>55</sup>NUS Graduate School for Integrative Science and Engineering, National University of Singapore, Singapore, Singapore
- <sup>56</sup>Department of Statistics and Applied Probability, National University of Singapore, Singapore, Singapore
- <sup>57</sup>Department of Medical Science Mathematics, Medical Research Institute, Tokyo Medical and Dental University, Tokyo, Japan
- <sup>58</sup>Beijing Tongren Eye Center, Beijing Tongren Hospital, Beijing Ophthalmology and Visual Science Key Lab, Beijing Key Laboratory of Intraocular Tumor Diagnosis and Treatment, Capital Medical University, Beijing, China
- <sup>59</sup>Department of Epidemiology, Shanghai Cancer Institute, Shanghai, China
- <sup>60</sup>Department of Epidemiology, Graduate School of Public Health, University of Pittsburgh, Pittsburgh, Pennsylvania, USA
- <sup>61</sup>Division of Cancer Control and Population Sciences, University of Pittsburgh Cancer Institute, Pittsburgh, Pennsylvania, USA
- <sup>62</sup>Center for Public Health Genomics, University of Virginia School of Medicine, Charlottesville, Virginia, USA

## SUPPLEMENTARY DATA

<sup>63</sup>Center for Genome Science, Korean National Institute of Health, Osong, Chungchungbuk-do, South Korea

<sup>64</sup>Laboratory for Cardiovascular Diseases, RIKEN Center for Integrative Medical Sciences, Yokohama, Japan

<sup>65</sup>Department of Human Genetics and Disease Diversity, Graduate School of Medical and Dental Sciences, Tokyo Medical and Dental University, Tokyo, Japan

<sup>66</sup>Department of Biomedical Science, Hallym University, Chuncheon, Korea

<sup>67</sup>Department of Clinical Gene Therapy, Osaka University Graduate School of Medicine, Suita, Japan

<sup>68</sup>Department of Ophthalmology, Medical Faculty Mannheim of the Ruprecht-Karls-University of Heidelberg, Mannheim, Germany
